# Supplementary material for: IL6-mediated HCoV-host interactome regulatory network and GO/Pathway enrichment analysis
Source: PubMed Central journal article supplement (PMC7561109; doi:10.1371/journal.pcbi.1008238), 2020-09-30
Supplement: pcbi.1008238.s004.pdf [file pcbi.1008238.s004.pdf]

|                                   |           |
|-----------------------------------|-----------|
| <b>GO CLASSIFICATION:</b> .....   | <b>2</b>  |
| 1 HCOV-HOST_SET .....             | <b>2</b>  |
| 1.1 GO CLASSIFICATION .....       | 2         |
| 1.2 TABLES CLASSIFICATION .....   | 4         |
| 1.2.1 MOLECULAR FUNCTION .....    | 4         |
| 1.2.2 CELLULAR COMPONENT .....    | 6         |
| 1.2.3 BIOLOGICAL PROCESS .....    | 12        |
| 2 HCOV-CLUSTER_SET .....          | <b>24</b> |
| 2.1 GO CLASSIFICATION .....       | 24        |
| 2.2 TABLES CLASSIFICATION .....   | 26        |
| 2.2.1 MOLECULAR FUNCTION .....    | 26        |
| 2.2.2 CELLULAR COMPONENT .....    | 27        |
| 2.2.3 BIOLOGICAL PROCESS .....    | 29        |
| <b>GO ENRICHMENT:</b> .....       | <b>37</b> |
| 1 HCOV-HOST_SET .....             | <b>38</b> |
| 1.1 GO ENRICHMENT .....           | 38        |
| 1.2 TABLES ENRICHMENT .....       | 41        |
| 1.2.1 MOLECULAR FUNCTION .....    | 41        |
| 1.2.2 CELLULAR COMPONENT .....    | 42        |
| 1.2.3 BIOLOGICAL PROCESS .....    | 43        |
| 2 HCOV-CLUSTER_SET .....          | <b>54</b> |
| 2.1 GO ENRICHMENT .....           | 54        |
| 2.2 TABLES ENRICHMENT .....       | 58        |
| 2.2.1 MOLECULAR FUNCTION .....    | 58        |
| 2.2.2 CELLULAR COMPONENT .....    | 59        |
| 2.2.3 BIOLOGICAL PROCESS .....    | 59        |
| <b>PATHWAY ENRICHMENT:</b> .....  | <b>78</b> |
| 1 HCOV-HOST_SET .....             | <b>78</b> |
| 1.1 KEGG PATHWAY ENRICHMENT ..... | 79        |
| 1.2 WIKI PATHWAY .....            | 81        |
| 2 HCOV-CLUSTER_SET .....          | <b>84</b> |
| 2.1 KEGG PATHWAY ENRICHMENT ..... | 84        |
| 2.2 WIKI PATHWAY .....            | 88        |
| <b>CLUSTER ANALYSIS</b> .....     | <b>93</b> |
| 1 CLUSTER COMPARISON .....        | <b>93</b> |
| 2 TABLES .....                    | <b>95</b> |
| 2.1 GO .....                      | 95        |
| 2.2 KEGG.....                     | 99        |
| 2.3 GO LOCATION .....             | 100       |

# GO CLASSIFICATION:

## 1 HCOV-HOST\_SET

### 1.1 GO CLASSIFICATION

Functional Profile of a gene set at specific GO level. Genes are classified according to their GO distribution at a specific level.

## MOLECULAR FUNCTION

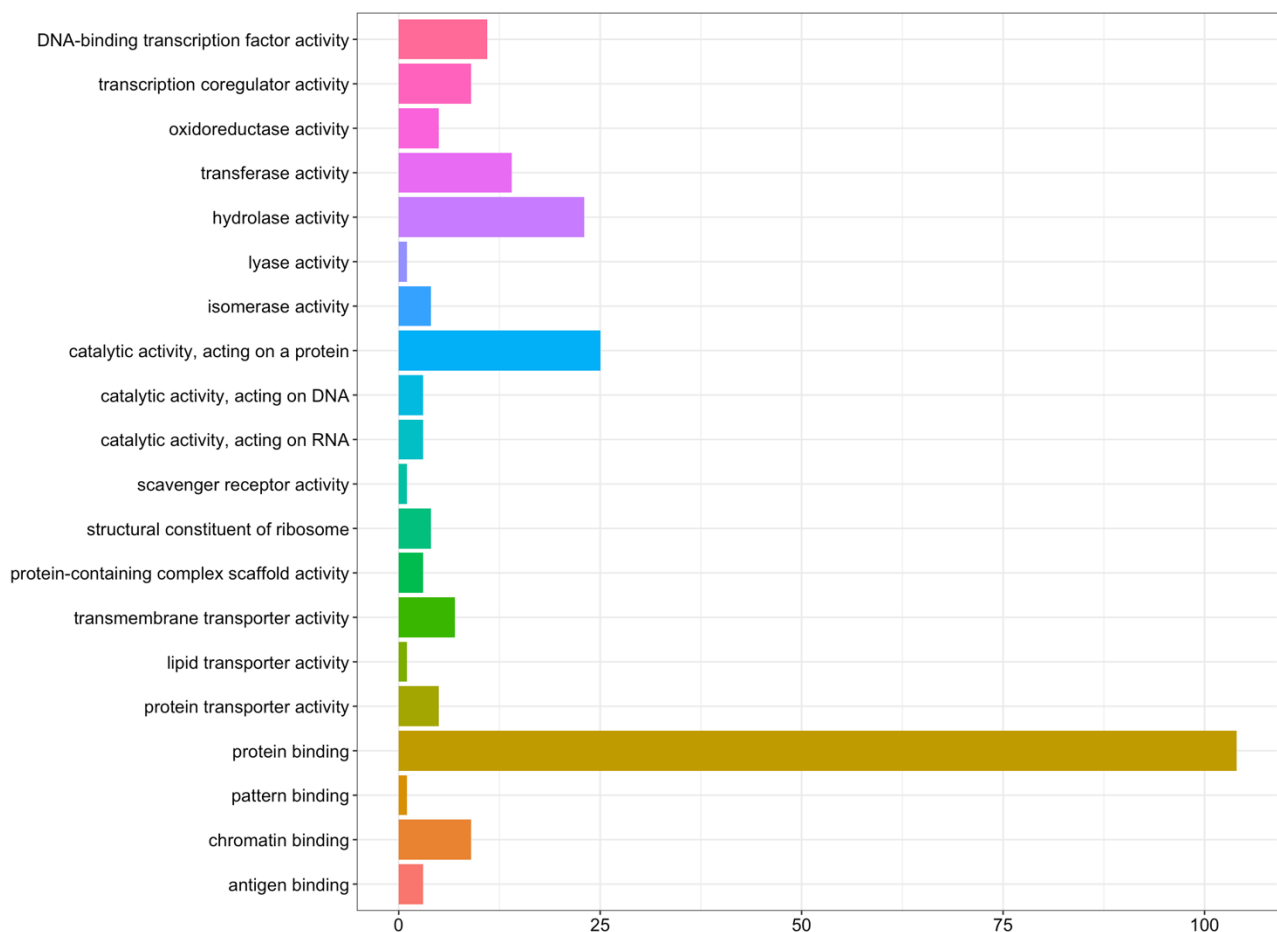

# CELLULAR COMPONENT

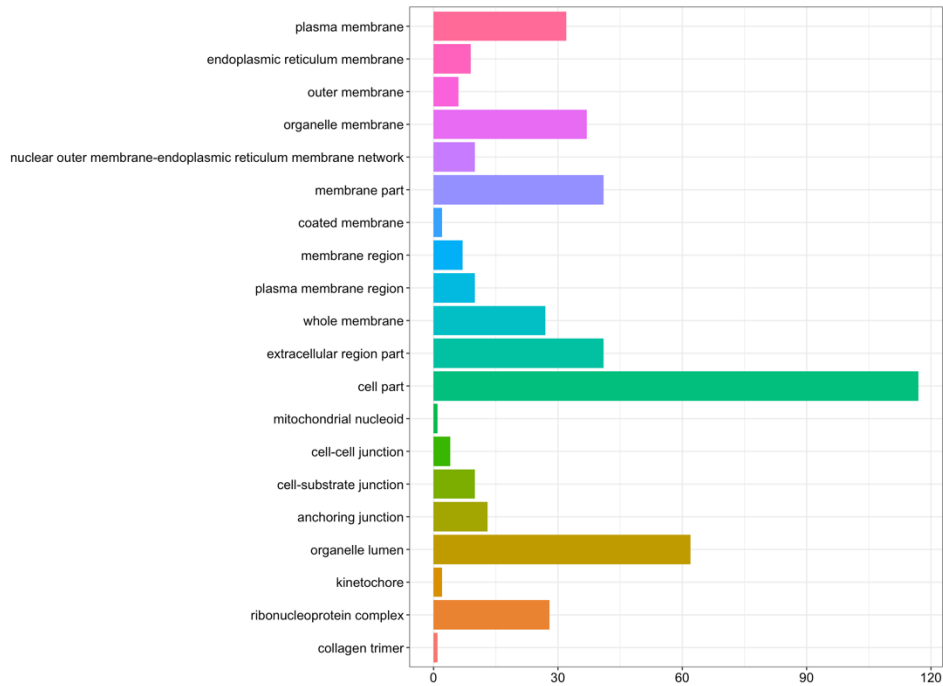

# BIOLOGICAL PROCESS

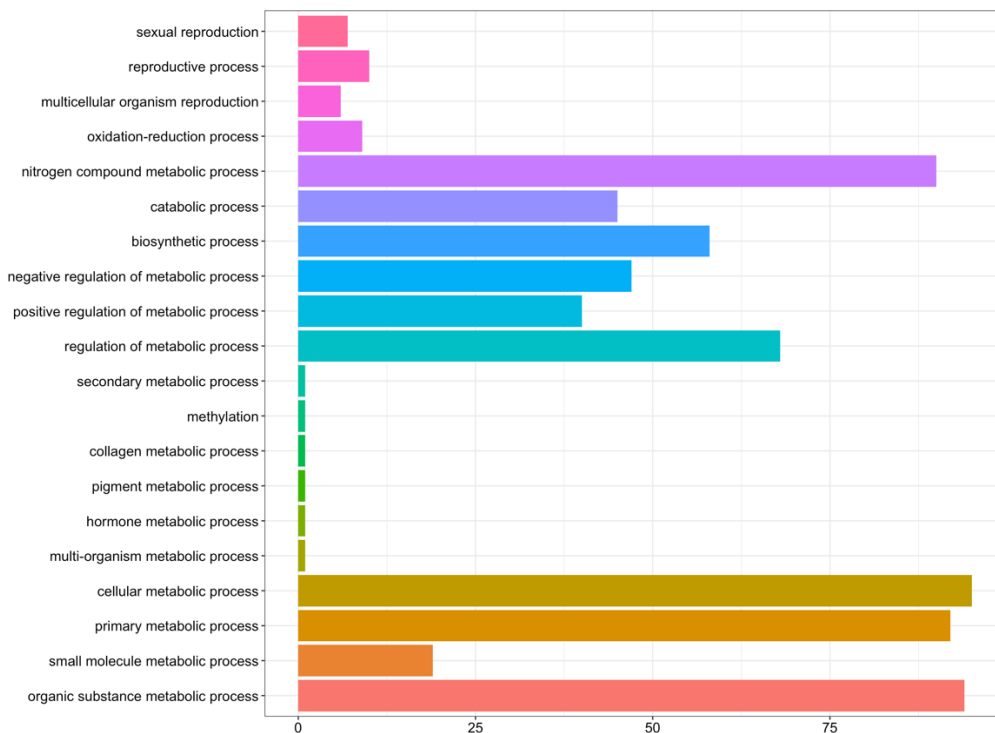

## 1.2 TABLES CLASSIFICATION

### 1.2.1 MOLECULAR FUNCTION

| ID         | Description                                  | GeneRatio | geneID                                                                                                                                                                                                                                                                                                                                                                                                                                                                                                                                                                                                                                               |
|------------|----------------------------------------------|-----------|------------------------------------------------------------------------------------------------------------------------------------------------------------------------------------------------------------------------------------------------------------------------------------------------------------------------------------------------------------------------------------------------------------------------------------------------------------------------------------------------------------------------------------------------------------------------------------------------------------------------------------------------------|
| GO:0003700 | DNA-binding transcription factor activity    | 11/119    | TFEB STAT5A PHB JUN STAT3 SMAD3 ATF5 IRF3 NONO PARP1 TERF1                                                                                                                                                                                                                                                                                                                                                                                                                                                                                                                                                                                           |
| GO:0003712 | transcription coregulator activity           | 9/119     | JUN SMAD3 ATF5 IRF3 DNAJB1 NPM1 DDX1 RYBP PFDN5                                                                                                                                                                                                                                                                                                                                                                                                                                                                                                                                                                                                      |
| GO:0016491 | oxidoreductase activity                      | 5/119     | ND4L COX2 RRM2 NDUFA10 VKORC1                                                                                                                                                                                                                                                                                                                                                                                                                                                                                                                                                                                                                        |
| GO:0016740 | transferase activity                         | 14/119    | YKT6 STAT5A SKP2 IKBKB NMT1 GSK3A GSK3B PARP1 MARK3 MKRN2 MKRN3 CHEK2 TERF1 UBE2I                                                                                                                                                                                                                                                                                                                                                                                                                                                                                                                                                                    |
| GO:0016787 | hydrolase activity                           | 23/119    | PSMC2 PPP1CA FGL2 ACE2 Tmprss2 ANPEP DPP4 HSPD1 HSPA9 EIF3F KIF11 PSMD1 SRP54 G3BP1 DDX1 DDAH2 TPSAB1 PSMA2 ABHD17A DCTN2 DDX5 EEF1A1 ATP6V1G1                                                                                                                                                                                                                                                                                                                                                                                                                                                                                                       |
| GO:0016829 | lyase activity                               | 1/119     | ACO2                                                                                                                                                                                                                                                                                                                                                                                                                                                                                                                                                                                                                                                 |
| GO:0016853 | isomerase activity                           | 4/119     | PPIA FKBP1A PPIG PPIH                                                                                                                                                                                                                                                                                                                                                                                                                                                                                                                                                                                                                                |
| GO:0140096 | catalytic activity, acting on a protein      | 25/119    | YKT6 STAT5A PPP1CA FGL2 ACE2 PPIA SKP2 Tmprss2 IKBKB ANPEP DPP4 EIF3F PSMD1 GSK3A GSK3B PARP1 FKBP1A PPIG MARK3 PPIH TPSAB1 PSMA2 ABHD17A CHEK2 UBE2I                                                                                                                                                                                                                                                                                                                                                                                                                                                                                                |
| GO:0140097 | catalytic activity, acting on DNA            | 3/119     | G3BP1 DDX1 TERF1                                                                                                                                                                                                                                                                                                                                                                                                                                                                                                                                                                                                                                     |
| GO:0140098 | catalytic activity, acting on RNA            | 3/119     | G3BP1 DDX1 DDX5                                                                                                                                                                                                                                                                                                                                                                                                                                                                                                                                                                                                                                      |
| GO:0005044 | scavenger receptor activity                  | 1/119     | Tmprss2                                                                                                                                                                                                                                                                                                                                                                                                                                                                                                                                                                                                                                              |
| GO:0003735 | structural constituent of ribosome           | 4/119     | RSL24D1 RPL13A RPL19 RPS20                                                                                                                                                                                                                                                                                                                                                                                                                                                                                                                                                                                                                           |
| GO:0032947 | protein-containing complex scaffold activity | 3/119     | G3BP2 CAV1 SGTA                                                                                                                                                                                                                                                                                                                                                                                                                                                                                                                                                                                                                                      |
| GO:0022857 | transmembrane transporter activity           | 7/119     | COX2 MCL1 BCL2 CEACAM1 ANXA2 HNRNPA3 ATP6V1G1                                                                                                                                                                                                                                                                                                                                                                                                                                                                                                                                                                                                        |
| GO:0005319 | lipid transporter activity                   | 1/119     | CEACAM1                                                                                                                                                                                                                                                                                                                                                                                                                                                                                                                                                                                                                                              |
| GO:0008565 | protein transporter activity                 | 5/119     | KPNB1 XPO1 KPNA2 MCL1 KPNA4                                                                                                                                                                                                                                                                                                                                                                                                                                                                                                                                                                                                                          |
| GO:0005515 | protein binding                              | 104/119   | BTf3 SCFD1 PSMC2 TFEB TWf2 YKT6 KPNB1 STX5 STAT5A RSL24D1 PHB JUN STAT3 PPP1CA XPO1 TGFB1 SMAD3 ATF5 COX2 HNRNPA1 ACE2 CLEC4G CD209 CLEC4M IRF3 KPNA2 SFTPD PPIA BCL2L1 BCL2L2 MCL1 BCL2A1 BCL2 SKP2 KPNA4 PRKRA CD9 Tmprss2 IKBKB DPP4 SYNCRIP PTBP1 CEACAM1 ANXA2 HNRNPA2B1 HNRNPA3 DNAJB1 HSPD1 HSPA9 COPB2 EIF3E EIF3I CHMP4B EIF3F GBF1 RRM2 KIF11 PSMD1 SRP54 NUDCD1 SNX9 NONO GSK3A GSK3B PABPC1 PABPC4 NPM1 G3BP1 G3BP2 RPL19 PARP1 NCL DDX1 RYBP FKBP1A PPIG MARK3 PPIH RCAN3 HGS BAG6 DDAH2 CAMLG CHMP2B SNAP47 MKRN2 TPSAB1 SERPING1 MKRN3 PSMA2 ABHD17A PFDN5 MIF4GD H2AFY2 RPS20 CHEK2 TERF1 DCTN2 DDX5 EEF1A1 CAV1 UBE2I SGTA ATP6V1G1 |
| GO:0001871 | pattern binding                              | 1/119     | CLEC4G                                                                                                                                                                                                                                                                                                                                                                                                                                                                                                                                                                                                                                               |

| ID         | Description                                | GeneRatio | geneID                                                                                                                                                                                                                                                                                                                                                                                        |
|------------|--------------------------------------------|-----------|-----------------------------------------------------------------------------------------------------------------------------------------------------------------------------------------------------------------------------------------------------------------------------------------------------------------------------------------------------------------------------------------------|
| GO:0003682 | chromatin binding                          | 9/119     | JUN STAT3 SMAD3 ATF5 NONO NPM1 DDX1 H2AFY2 DDX5                                                                                                                                                                                                                                                                                                                                               |
| GO:0003823 | antigen binding                            | 3/119     | TGFB1 CD209 CLEC4M                                                                                                                                                                                                                                                                                                                                                                            |
| GO:0030246 | carbohydrate binding                       | 5/119     | CLEC4G CD209 CLEC4M SFTPD NOMO3                                                                                                                                                                                                                                                                                                                                                               |
| GO:0098631 | cell adhesion mediator activity            | 2/119     | PPP1CA ANXA2                                                                                                                                                                                                                                                                                                                                                                                  |
| GO:0008289 | lipid binding                              | 8/119     | TWF2 ACBD5 SFTPD ANXA2 HSPD1 GBF1 SNX9 CAV1                                                                                                                                                                                                                                                                                                                                                   |
| GO:0008144 | drug binding                               | 19/119    | PSMC2 TWF2 PPIA IKBKB HSPD1 HSPA9 KIF11 SRP54 GSK3A GSK3B G3BP1 DDX1 FKBP1A PPIG MARK3 PPIH CHEK2 DDX5 UBE2I                                                                                                                                                                                                                                                                                  |
| GO:0050840 | extracellular matrix binding               | 1/119     | ANXA2                                                                                                                                                                                                                                                                                                                                                                                         |
| GO:0033218 | amide binding                              | 11/119    | KPNB1 ACBD5 CD209 CLEC4M KPNA2 PPIA ANPEP HSPD1 SRP54 PPIG PPIH                                                                                                                                                                                                                                                                                                                               |
| GO:0036094 | small molecule binding                     | 23/119    | PSMC2 TWF2 ACBD5 CD209 CLEC4M SFTPD IKBKB HSPD1 HSPA9 KIF11 SRP54 GSK3A GSK3B G3BP1 PARP1 DDX1 MARK3 DDAH2 CHEK2 DDX5 EEF1A1 CAV1 UBE2I                                                                                                                                                                                                                                                       |
| GO:0042562 | hormone binding                            | 1/119     | HSPD1                                                                                                                                                                                                                                                                                                                                                                                         |
| GO:0043167 | ion binding                                | 37/119    | PSMC2 TWF2 KPNB1 ACBD5 PPP1CA SMAD3 COX2 ACE2 CD209 CLEC4M IKBKB ANPEP ZCRB1 ANXA2 ACO2 HSPD1 HSPA9 GBF1 RRM2 KIF11 SRP54 SNX9 GSK3A GSK3B G3BP1 PARP1 DDX1 RYBP MARK3 HGS DDAH2 MKRN2 MKRN3 CHEK2 DDX5 EEF1A1 UBE2I                                                                                                                                                                          |
| GO:0044877 | protein-containing complex binding         | 15/119    | SCFD1 TWF2 PPP1CA SMAD3 CD9 HSPD1 KIF11 SRP54 SNX9 NPM1 FKBP1A PPIH BAG6 DDX5 SGTA                                                                                                                                                                                                                                                                                                            |
| GO:0046790 | virion binding                             | 4/119     | CD209 CLEC4M PPIA ANXA2                                                                                                                                                                                                                                                                                                                                                                       |
| GO:0048037 | cofactor binding                           | 4/119     | ACBD5 ACO2 PARP1 VKORC1                                                                                                                                                                                                                                                                                                                                                                       |
| GO:0051540 | metal cluster binding                      | 1/119     | ACO2                                                                                                                                                                                                                                                                                                                                                                                          |
| GO:0060090 | molecular adaptor activity                 | 1/119     | CAV1                                                                                                                                                                                                                                                                                                                                                                                          |
| GO:0072341 | modified amino acid binding                | 1/119     | ANXA2                                                                                                                                                                                                                                                                                                                                                                                         |
| GO:0097159 | organic cyclic compound binding            | 64/119    | BTF3 PSMC2 TFEB TWF2 KPNB1 STAT5A RSL24D1 ACBD5 PHB JUN STAT3 XPO1 SMAD3 ATF5 HNRNPA1 IRF3 KPNA2 PPIA BCL2 PRKRA IKBKB ZCRB1 SYNCRIP PTBP1 ANXA2 HNRNPA2B1 HNRNPA3 HSPD1 HSPA9 RPL13A EIF3E EIF3I EIF3F KIF11 SRP54 NACA NONO GSK3A GSK3B PABPC1 PABPC4 NPM1 G3BP1 G3BP2 RPL19 PARP1 NCL DDX1 RYBP FKBP1A PPIG MARK3 RCAN3 MKRN2 MIF4GD LAS1L H2AFY2 RPS20 CHEK2 TERF1 DDX5 EEF1A1 CAV1 UBE2I |
| GO:0097367 | carbohydrate derivative binding            | 18/119    | PSMC2 TWF2 ACBD5 SFTPD IKBKB HSPD1 HSPA9 KIF11 SRP54 GSK3A GSK3B G3BP1 DDX1 MARK3 CHEK2 DDX5 EEF1A1 UBE2I                                                                                                                                                                                                                                                                                     |
| GO:1901363 | heterocyclic compound binding              | 63/119    | BTF3 PSMC2 TFEB TWF2 KPNB1 STAT5A RSL24D1 ACBD5 PHB JUN STAT3 XPO1 SMAD3 ATF5 HNRNPA1 IRF3 KPNA2 PPIA BCL2 PRKRA IKBKB ZCRB1 SYNCRIP PTBP1 ANXA2 HNRNPA2B1 HNRNPA3 HSPD1 HSPA9 RPL13A EIF3E EIF3I EIF3F KIF11 SRP54 NACA NONO GSK3A GSK3B PABPC1 PABPC4 NPM1 G3BP1 G3BP2 RPL19 PARP1 NCL DDX1 RYBP FKBP1A PPIG MARK3 RCAN3 MKRN2 MIF4GD LAS1L H2AFY2 RPS20 CHEK2 TERF1 DDX5 EEF1A1 UBE2I      |
| GO:1901567 | fatty acid derivative binding              | 1/119     | ACBD5                                                                                                                                                                                                                                                                                                                                                                                         |
| GO:1901681 | sulfur compound binding                    | 1/119     | ACBD5                                                                                                                                                                                                                                                                                                                                                                                         |
| GO:0005085 | guanyl-nucleotide exchange factor activity | 1/119     | GBF1                                                                                                                                                                                                                                                                                                                                                                                          |

| ID         | Description                                                                   | GeneRatio | geneID                                                      |
|------------|-------------------------------------------------------------------------------|-----------|-------------------------------------------------------------|
| GO:0016247 | channel regulator activity                                                    | 2/119     | BCL2 CAV1                                                   |
| GO:0030234 | enzyme regulator activity                                                     | 10/119    | JUN TGFB1 PRKRA ANXA2 DNAJB1 PSMD1 NPM1 RCAN3 SERPING1 CAV1 |
| GO:0030545 | receptor regulator activity                                                   | 1/119     | TGFB1                                                       |
| GO:0090079 | translation regulator activity,<br>nucleic acid binding                       | 2/119     | PABPC1 MIF4GD                                               |
| GO:0038023 | signaling receptor activity                                                   | 2/119     | CLEC4M ANPEP                                                |
| GO:0005072 | transforming growth factor<br>beta receptor, cytoplasmic<br>mediator activity | 1/119     | SMAD3                                                       |
| GO:0001618 | virus receptor activity                                                       | 6/119     | ACE2 CLEC4G CD209 CLEC4M ANPEP DPP4                         |
| GO:0140142 | nucleocytoplasmic carrier<br>activity                                         | 3/119     | XPO1 KPNA2 KPNA4                                            |

## 1.2.2 CELLULAR COMPONENT

| ID         | Description                                                          | GeneRatio | geneID                                                                                                                                                                                                                                                  |
|------------|----------------------------------------------------------------------|-----------|---------------------------------------------------------------------------------------------------------------------------------------------------------------------------------------------------------------------------------------------------------|
| GO:0005886 | plasma membrane                                                      | 32/119    | SCFD1 YKT6 PHB STAT3 PPP1CA TGFB1 SMAD3 ACE2 CLEC4G CD209 CLEC4M KPNA2 CD9 TMRSS2 IKKBK ANPEP DPP4 CEACAM1 ANXA2 HSPD1 NMT1 CHMP4B SNX9 GSK3B FKBP1A MARK3 CHMP2B SNAP47 ABHD17A EEF1A1 CAV1 ATP6V1G1                                                   |
| GO:0005789 | endoplasmic reticulum<br>membrane                                    | 9/119     | SCFD1 STX5 SFTPD BCL2 COPB2 NOMO3 FKBP1A VKORC1 CAV1                                                                                                                                                                                                    |
| GO:0019867 | outer membrane                                                       | 6/119     | PHB BCL2L1 BCL2L2 MCL1 BCL2A1 BCL2                                                                                                                                                                                                                      |
| GO:0031090 | organelle membrane                                                   | 37/119    | SCFD1 YKT6 KPNB1 STX5 ACBD5 PHB STAT3 XPO1 SMAD3 ND4L COX2 BCL2L1 BCL2L2 MCL1 BCL2A1 BCL2 KPNA4 CD9 ANPEP DPP4 CEACAM1 ANXA2 HSPD1 COPB2 CHMP4B GBF1 SNX9 FKBP1A HGS CHMP2B SNAP47 ABHD17A NDUFA10 EEF1A1 CAV1 SGTA ATP6V1G1                            |
| GO:0042175 | nuclear outer membrane-<br>endoplasmic reticulum<br>membrane network | 10/119    | SCFD1 STX5 XPO1 SFTPD BCL2 COPB2 NOMO3 FKBP1A VKORC1 CAV1                                                                                                                                                                                               |
| GO:0044425 | membrane part                                                        | 41/119    | SCFD1 YKT6 STX5 ACBD5 PHB XPO1 ND4L COX2 ACE2 CLEC4G CD209 CLEC4M KPNA2 SFTPD BCL2L1 MCL1 BCL2 CD9 TMRSS2 IKKBK ANPEP DPP4 CEACAM1 ANXA2 HSPD1 COPB2 NMT1 CHMP4B SNX9 NOMO3 FKBP1A CAMLG CHMP2B SNAP47 ABHD17A NDUFA10 VKORC1 EEF1A1 CAV1 SGTA ATP6V1G1 |
| GO:0048475 | coated membrane                                                      | 2/119     | COPB2 CHMP4B                                                                                                                                                                                                                                            |
| GO:0098589 | membrane region                                                      | 7/119     | XPO1 ACE2 IKKBK DPP4 ANXA2 HSPD1 CAV1                                                                                                                                                                                                                   |
| GO:0098590 | plasma membrane region                                               | 10/119    | PHB ACE2 KPNA2 CD9 DPP4 CEACAM1 ANXA2 ABHD17A EEF1A1 CAV1                                                                                                                                                                                               |
| GO:0098805 | whole membrane                                                       | 27/119    | STX5 ACBD5 PHB XPO1 ACE2 BCL2L1 BCL2L2 MCL1 BCL2A1 BCL2 CD9 IKKBK ANPEP DPP4 CEACAM1 ANXA2 HSPD1 COPB2 CHMP4B HGS CHMP2B SNAP47 ABHD17A EEF1A1 CAV1 SGTA ATP6V1G1                                                                                       |
| GO:0044421 | extracellular region part                                            | 41/119    | TWF2 KPNB1 PHB PPP1CA FGL2 TGFB1 HNRNPA1 ACE2 SFTPD PPIA CD9 TMRSS2 ANPEP DPP4 PTBP1 CEACAM1 ANXA2 HNRNPA2B1 DNAJB1 HSPD1 HSPA9 EIF3E                                                                                                                   |

| ID         | Description                                        | GeneRatio | geneID                                                                                                                                                                                                                                                                                                                                                                                                                                                                                                                                                                                                                                                                                                                               |
|------------|----------------------------------------------------|-----------|--------------------------------------------------------------------------------------------------------------------------------------------------------------------------------------------------------------------------------------------------------------------------------------------------------------------------------------------------------------------------------------------------------------------------------------------------------------------------------------------------------------------------------------------------------------------------------------------------------------------------------------------------------------------------------------------------------------------------------------|
|            |                                                    |           | EIF3I CHMP4B SNX9 PABPC1 NCL MARK3 HGS BAG6 DDAH2 CHMP2B TPSAB1 SERPING1 PSMA2 H2AFY2 RPS20 DCTN2 DDX5 EEF1A1 ATP6V1G1                                                                                                                                                                                                                                                                                                                                                                                                                                                                                                                                                                                                               |
| GO:0044464 | cell part                                          | 117/119   | BTF3 SCFD1 PSMC2 TFEB TWF2 YKT6 KPNB1 STX5 STAT5A RSL24D1 ACBD5 PHB JUN STAT3 PPP1CA SPECC1 FGL2 XPO1 TGFB1 SMAD3 ATF5 ND4L COX2 HNRNPA1 ACE2 CLEC4G CD209 CLEC4M IRF3 KPNA2 SFTPD PPIA BCL2L1 BCL2L2 MCL1 BCL2A1 BCL2 SKP2 KPNA4 PRKRA CD9 TMPRSS2 IKBKB ANPEP ZCRB1 DPP4 SYNCRIP PTBP1 CEACAM1 ANXA2 HNRNPA2B1 HNRNPA3 ACO2 DNAJB1 HSPD1 HSPA9 COPB2 RPL13A EIF3E EIF3I NMT1 CHMP4B EIF3F GBF1 RRM2 KIF11 PSMD1 SRP54 NUDCD1 NACA SNX9 NONO GSK3A GSK3B PABPC1 PABPC4 NPM1 G3BP1 G3BP2 RPL19 PARP1 NCL DDX1 RYBP NOMO3 FKBP1A PPIG MARK3 PPIH RCAN3 HGS BAG6 DDAH2 CAMLG CHMP2B SNAP47 MKRN2 SERPING1 PSMA2 ABHD17A PFDN5 MIF4GD NDUFA10 VKORC1 LAS1L H2AFY2 RPS20 CHEK2 TERF1 DCTN2 DDX5 C11orf74 EEF1A1 CAV1 UBE2I SGTA ATP6V1G1 |
| GO:0042645 | mitochondrial nucleoid                             | 1/119     | HSPA9                                                                                                                                                                                                                                                                                                                                                                                                                                                                                                                                                                                                                                                                                                                                |
| GO:0005911 | cell-cell junction                                 | 4/119     | PPP1CA DPP4 CEACAM1 ANXA2                                                                                                                                                                                                                                                                                                                                                                                                                                                                                                                                                                                                                                                                                                            |
| GO:0030055 | cell-substrate junction                            | 10/119    | PPIA CD9 DPP4 HSPA9 RPL13A PABPC1 NPM1 G3BP1 RPL19 CAV1                                                                                                                                                                                                                                                                                                                                                                                                                                                                                                                                                                                                                                                                              |
| GO:0070161 | anchoring junction                                 | 13/119    | PPP1CA PPIA CD9 DPP4 CEACAM1 ANXA2 HSPA9 RPL13A PABPC1 NPM1 G3BP1 RPL19 CAV1                                                                                                                                                                                                                                                                                                                                                                                                                                                                                                                                                                                                                                                         |
| GO:0043233 | organelle lumen                                    | 62/119    | PSMC2 KPNB1 STAT5A RSL24D1 ACBD5 PHB JUN STAT3 PPP1CA FGL2 XPO1 TGFB1 SMAD3 ATF5 HNRNPA1 IRF3 KPNA2 PPIA BCL2L1 MCL1 BCL2 SKP2 KPNA4 PRKRA ZCRB1 SYNCRIP PTBP1 ANXA2 HNRNPA2B1 HNRNPA3 ACO2 DNAJB1 HSPD1 HSPA9 RPL13A EIF3E GBF1 PSMD1 SRP54 NUDCD1 NONO GSK3B NPM1 PARP1 NCL DDX1 RYBP PPIG PPIH BAG6 SERPING1 PSMA2 MIF4GD NDUFA10 LAS1L H2AFY2 RPS20 CHEK2 TERF1 DDX5 EEF1A1 UBE2I                                                                                                                                                                                                                                                                                                                                                |
| GO:0000776 | kinetochore                                        | 2/119     | XPO1 DCTN2                                                                                                                                                                                                                                                                                                                                                                                                                                                                                                                                                                                                                                                                                                                           |
| GO:1990904 | ribonucleoprotein complex                          | 28/119    | PSMC2 KPNB1 RSL24D1 XPO1 HNRNPA1 ZCRB1 SYNCRIP HNRNPA2B1 HNRNPA3 RPL13A EIF3E EIF3I EIF3F SRP54 PABPC1 PABPC4 NPM1 G3BP1 G3BP2 RPL19 NCL DDX1 PPIH MKRN3 PSMA2 LAS1L RPS20 DDX5                                                                                                                                                                                                                                                                                                                                                                                                                                                                                                                                                      |
| GO:0005581 | collagen trimer                                    | 1/119     | SFTPD                                                                                                                                                                                                                                                                                                                                                                                                                                                                                                                                                                                                                                                                                                                                |
| GO:0005577 | fibrinogen complex                                 | 1/119     | FGL2                                                                                                                                                                                                                                                                                                                                                                                                                                                                                                                                                                                                                                                                                                                                 |
| GO:0005643 | nuclear pore                                       | 1/119     | KPNB1                                                                                                                                                                                                                                                                                                                                                                                                                                                                                                                                                                                                                                                                                                                                |
| GO:0005667 | transcription factor complex                       | 6/119     | JUN STAT3 SMAD3 ATF5 NONO PARP1                                                                                                                                                                                                                                                                                                                                                                                                                                                                                                                                                                                                                                                                                                      |
| GO:0005838 | proteasome regulatory particle                     | 2/119     | PSMC2 PSMD1                                                                                                                                                                                                                                                                                                                                                                                                                                                                                                                                                                                                                                                                                                                          |
| GO:0005839 | proteasome core complex                            | 1/119     | PSMA2                                                                                                                                                                                                                                                                                                                                                                                                                                                                                                                                                                                                                                                                                                                                |
| GO:0005852 | eukaryotic translation initiation factor 3 complex | 3/119     | EIF3E EIF3I EIF3F                                                                                                                                                                                                                                                                                                                                                                                                                                                                                                                                                                                                                                                                                                                    |
| GO:0005853 | eukaryotic translation elongation factor 1 complex | 1/119     | EEF1A1                                                                                                                                                                                                                                                                                                                                                                                                                                                                                                                                                                                                                                                                                                                               |
| GO:0005854 | nascent polypeptide-associated complex             | 1/119     | NACA                                                                                                                                                                                                                                                                                                                                                                                                                                                                                                                                                                                                                                                                                                                                 |
| GO:0005875 | microtubule associated complex                     | 2/119     | KIF11 DCTN2                                                                                                                                                                                                                                                                                                                                                                                                                                                                                                                                                                                                                                                                                                                          |
| GO:0008540 | proteasome regulatory particle, base subcomplex    | 2/119     | PSMC2 PSMD1                                                                                                                                                                                                                                                                                                                                                                                                                                                                                                                                                                                                                                                                                                                          |
| GO:0016272 | prefoldin complex                                  | 1/119     | PFDN5                                                                                                                                                                                                                                                                                                                                                                                                                                                                                                                                                                                                                                                                                                                                |

| <b>ID</b>  | <b>Description</b>                             | <b>GeneRatio</b> | <b>geneID</b>                                                                                                          |
|------------|------------------------------------------------|------------------|------------------------------------------------------------------------------------------------------------------------|
| GO:0017053 | transcriptional repressor complex              | 1/119            | JUN                                                                                                                    |
| GO:0019773 | proteasome core complex, alpha-subunit complex | 1/119            | PSMA2                                                                                                                  |
| GO:0022624 | proteasome accessory complex                   | 2/119            | PSMC2 PSMD1                                                                                                            |
| GO:0030877 | beta-catenin destruction complex               | 2/119            | GSK3A GSK3B                                                                                                            |
| GO:0031082 | BLOC complex                                   | 1/119            | SNAP47                                                                                                                 |
| GO:0031519 | PcG protein complex                            | 1/119            | RYBP                                                                                                                   |
| GO:0031941 | filamentous actin                              | 1/119            | SPECC1                                                                                                                 |
| GO:0032993 | protein-DNA complex                            | 4/119            | NPM1 PARP1 H2AFY2 TERF1                                                                                                |
| GO:0036452 | ESCRT complex                                  | 3/119            | CHMP4B HGS CHMP2B                                                                                                      |
| GO:0043235 | receptor complex                               | 4/119            | SMAD3 IKBKB CEACAM1 HSPD1                                                                                              |
| GO:0044815 | DNA packaging complex                          | 1/119            | H2AFY2                                                                                                                 |
| GO:0070069 | cytochrome complex                             | 1/119            | COX2                                                                                                                   |
| GO:0070937 | CRD-mediated mRNA stability complex            | 1/119            | SYNCRIP                                                                                                                |
| GO:0071141 | SMAD protein complex                           | 1/119            | SMAD3                                                                                                                  |
| GO:0072379 | ER membrane insertion complex                  | 2/119            | BAG6 SGTA                                                                                                              |
| GO:0072669 | tRNA-splicing ligase complex                   | 1/119            | DDX1                                                                                                                   |
| GO:0097136 | Bcl-2 family protein complex                   | 3/119            | BCL2L1 BCL2L2 MCL1                                                                                                     |
| GO:0097452 | GAIT complex                                   | 2/119            | SYNCRIP RPL13A                                                                                                         |
| GO:0098796 | membrane protein complex                       | 16/119           | YKT6 STX5 ND4L COX2 BCL2 IKBKB CEACAM1 HSPD1 COPB2 CHMP4B FKBP1A CHMP2B SNAP47 NDUFA10 CAV1 ATP6V1G1                   |
| GO:0098798 | mitochondrial protein complex                  | 3/119            | ND4L COX2 NDUFA10                                                                                                      |
| GO:0120114 | Sm-like protein family complex                 | 1/119            | PIIH                                                                                                                   |
| GO:1902494 | catalytic complex                              | 18/119           | PSMC2 PPP1CA ND4L HNRNPA1 SKP2 PRKRA IKBKB SYNCRIP HNRNPA2B1 HNRNPA3 PSMD1 PABPC1 PSMA2 NDUFA10 LAS1L DCTN2 DDX5 UBE2I |
| GO:1990351 | transporter complex                            | 1/119            | FKBP1A                                                                                                                 |
| GO:1990356 | sumoylated E2 ligase complex                   | 1/119            | UBE2I                                                                                                                  |
| GO:1990667 | PCSK9-AnxA2 complex                            | 1/119            | ANXA2                                                                                                                  |



| ID         | Description                               | GeneRatio | geneID                                                                                                                                                                                                                                                                                                                                                                                                                                                                                                                                                                                                                                                               |
|------------|-------------------------------------------|-----------|----------------------------------------------------------------------------------------------------------------------------------------------------------------------------------------------------------------------------------------------------------------------------------------------------------------------------------------------------------------------------------------------------------------------------------------------------------------------------------------------------------------------------------------------------------------------------------------------------------------------------------------------------------------------|
| GO:1990909 | Wnt signalosome                           | 1/119     | GSK3B                                                                                                                                                                                                                                                                                                                                                                                                                                                                                                                                                                                                                                                                |
| GO:0005929 | cilium                                    | 2/119     | C11orf74 CAV1                                                                                                                                                                                                                                                                                                                                                                                                                                                                                                                                                                                                                                                        |
| GO:0043227 | membrane-bounded organelle                | 107/119   | BTF3 SCFD1 PSMC2 TFEB TWF2 YKT6 KPNB1 STX5 STAT5A RSL24D1 ACBD5 PHB JUN STAT3 PPP1CA SPECC1 FGL2 XPO1 TGFB1 SMAD3 ATF5 ND4L COX2 HNRNPA1 ACE2 IRF3 KPNA2 SFTPD PPIA BCL2L1 BCL2L2 MCL1 BCL2A1 BCL2 SKP2 KPNA4 PRKRA CD9 TMPRSS2 IKBKB ANPEP ZCRB1 DPP4 SYNCRIP PTBP1 CEACAM1 ANXA2 HNRNPA2B1 HNRNPA3 ACO2 DNAJB1 HSPD1 HSPA9 COPB2 RPL13A EIF3E EIF3I NMT1 CHMP4B GBF1 KIF11 PSMD1 SRP54 NUDCD1 NACA SNX9 NONO GSK3A GSK3B PABPC1 PABPC4 NPM1 G3BP1 PARP1 NCL DDX1 RYBP NOMO3 FKBP1A PPIG MARK3 PPIH HGS BAG6 DDAH2 CAMLG CHMP2B SNAP47 SERPING1 PSMA2 ABHD17A PFDN5 MIF4GD NDUFA10 VKORC1 LAS1L H2AFY2 RPS20 CHEK2 TERF1 DCTN2 DDX5 EEF1A1 CAV1 UBE2I SGTA ATP6V1G1 |
| GO:0043228 | non-membrane-bounded organelle            | 47/119    | PSMC2 TWF2 KPNB1 RSL24D1 JUN STAT3 PPP1CA SPECC1 XPO1 SMAD3 ATF5 BCL2L1 SKP2 PTBP1 ANXA2 HNRNPA2B1 HNRNPA3 DNAJB1 HSPA9 RPL13A EIF3E GBF1 KIF11 NONO GSK3B PABPC1 PABPC4 NPM1 G3BP1 RPL19 PARP1 NCL DDX1 FKBP1A DDAH2 PSMA2 MIF4GD LAS1L H2AFY2 RPS20 CHEK2 TERF1 DCTN2 DDX5 EEF1A1 CAV1 UBE2I                                                                                                                                                                                                                                                                                                                                                                       |
| GO:0043229 | intracellular organelle                   | 104/119   | BTF3 SCFD1 PSMC2 TFEB TWF2 YKT6 KPNB1 STX5 STAT5A RSL24D1 ACBD5 PHB JUN STAT3 PPP1CA SPECC1 FGL2 XPO1 TGFB1 SMAD3 ATF5 ND4L COX2 HNRNPA1 IRF3 KPNA2 SFTPD PPIA BCL2L1 BCL2L2 MCL1 BCL2A1 BCL2 SKP2 KPNA4 PRKRA CD9 IKBKB ANPEP ZCRB1 DPP4 SYNCRIP PTBP1 CEACAM1 ANXA2 HNRNPA2B1 HNRNPA3 ACO2 DNAJB1 HSPD1 HSPA9 COPB2 RPL13A EIF3E NMT1 CHMP4B GBF1 KIF11 PSMD1 SRP54 NUDCD1 NACA SNX9 NONO GSK3A GSK3B PABPC1 PABPC4 NPM1 G3BP1 RPL19 PARP1 NCL DDX1 RYBP NOMO3 FKBP1A PPIG PPIH HGS BAG6 DDAH2 CAMLG CHMP2B SNAP47 SERPING1 PSMA2 ABHD17A PFDN5 MIF4GD NDUFA10 VKORC1 LAS1L H2AFY2 RPS20 CHEK2 TERF1 DCTN2 DDX5 EEF1A1 CAV1 UBE2I SGTA ATP6V1G1                    |
| GO:0043230 | extracellular organelle                   | 38/119    | TWF2 KPNB1 PHB PPP1CA FGL2 HNRNPA1 ACE2 PPIA CD9 TMPRSS2 ANPEP DPP4 PTBP1 CEACAM1 ANXA2 HNRNPA2B1 DNAJB1 HSPD1 HSPA9 EIF3E EIF3I CHMP4B SNX9 PABPC1 NCL MARK3 HGS BAG6 DDAH2 CHMP2B SERPING1 PSMA2 H2AFY2 RPS20 DCTN2 DDX5 EEF1A1 ATP6V1G1                                                                                                                                                                                                                                                                                                                                                                                                                           |
| GO:0044422 | organelle part                            | 94/119    | SCFD1 PSMC2 TWF2 YKT6 KPNB1 STX5 STAT5A RSL24D1 ACBD5 PHB JUN STAT3 PPP1CA SPECC1 FGL2 XPO1 TGFB1 SMAD3 ATF5 ND4L COX2 HNRNPA1 IRF3 KPNA2 SFTPD PPIA BCL2L1 BCL2L2 MCL1 BCL2A1 BCL2 SKP2 KPNA4 PRKRA CD9 ANPEP ZCRB1 DPP4 SYNCRIP PTBP1 CEACAM1 ANXA2 HNRNPA2B1 HNRNPA3 ACO2 DNAJB1 HSPD1 HSPA9 COPB2 RPL13A EIF3E CHMP4B GBF1 KIF11 PSMD1 SRP54 NUDCD1 SNX9 NONO GSK3B PABPC1 NPM1 RPL19 PARP1 NCL DDX1 RYBP NOMO3 FKBP1A PPIG PPIH HGS BAG6 DDAH2 CHMP2B SNAP47 SERPING1 PSMA2 ABHD17A MIF4GD NDUFA10 VKORC1 LAS1L H2AFY2 RPS20 CHEK2 TERF1 DCTN2 DDX5 EEF1A1 CAV1 UBE2I SGTA ATP6V1G1                                                                             |
| GO:0099572 | postsynaptic specialization               | 7/119     | PHB STAT3 KPNA2 HNRNPA3 DNAJB1 CHMP2B ABHD17A                                                                                                                                                                                                                                                                                                                                                                                                                                                                                                                                                                                                                        |
| GO:0018995 | host                                      | 4/119     | KPNB1 XPO1 CD209 CLEC4M                                                                                                                                                                                                                                                                                                                                                                                                                                                                                                                                                                                                                                              |
| GO:0044217 | other organism part                       | 4/119     | KPNB1 XPO1 CD209 CLEC4M                                                                                                                                                                                                                                                                                                                                                                                                                                                                                                                                                                                                                                              |
| GO:0044216 | other organism cell                       | 4/119     | KPNB1 XPO1 CD209 CLEC4M                                                                                                                                                                                                                                                                                                                                                                                                                                                                                                                                                                                                                                              |
| GO:0005615 | extracellular space                       | 41/119    | TWF2 KPNB1 PHB PPP1CA FGL2 TGFB1 HNRNPA1 ACE2 SFTPD PPIA CD9 TMPRSS2 ANPEP DPP4 PTBP1 CEACAM1 ANXA2 HNRNPA2B1 DNAJB1 HSPD1 HSPA9 EIF3E EIF3I CHMP4B SNX9 PABPC1 NCL MARK3 HGS BAG6 DDAH2 CHMP2B TPSAB1 SERPING1 PSMA2 H2AFY2 RPS20 DCTN2 DDX5 EEF1A1 ATP6V1G1                                                                                                                                                                                                                                                                                                                                                                                                        |
| GO:0031012 | extracellular matrix                      | 4/119     | TGFB1 ANXA2 TPSAB1 SERPING1                                                                                                                                                                                                                                                                                                                                                                                                                                                                                                                                                                                                                                          |
| GO:0072562 | blood microparticle                       | 2/119     | TGFB1 SERPING1                                                                                                                                                                                                                                                                                                                                                                                                                                                                                                                                                                                                                                                       |
| GO:0031300 | intrinsic component of organelle membrane | 1/119     | ABHD17A                                                                                                                                                                                                                                                                                                                                                                                                                                                                                                                                                                                                                                                              |
| GO:0032420 | stereocilium                              | 1/119     | TWF2                                                                                                                                                                                                                                                                                                                                                                                                                                                                                                                                                                                                                                                                 |

| ID         | Description                                                 | GeneRatio | geneID                                                                                                                                                                                                                                                                                                                                                                                                                                                                                                                                                                                   |
|------------|-------------------------------------------------------------|-----------|------------------------------------------------------------------------------------------------------------------------------------------------------------------------------------------------------------------------------------------------------------------------------------------------------------------------------------------------------------------------------------------------------------------------------------------------------------------------------------------------------------------------------------------------------------------------------------------|
| GO:0044446 | intracellular organelle part                                | 94/119    | SCFD1 PSMC2 TWF2 YKT6 KPNB1 STX5 STAT5A RSL24D1 ACBD5 PHB JUN STAT3 PPP1CA SPECC1 FGL2 XPO1 TGFB1 SMAD3 ATF5 ND4L COX2 HNRNPA1 IRF3 KPNA2 SFTPD PPIA BCL2L1 BCL2L2 MCL1 BCL2A1 BCL2 SKP2 KPNA4 PRKRA CD9 ANPEP ZCRB1 DPP4 SYNCRIP PTBP1 CEACAM1 ANXA2 HNRNPA2B1 HNRNPA3 ACO2 DNAJB1 HSPD1 HSPA9 COPB2 RPL13A EIF3E CHMP4B GBF1 KIF11 PSMD1 SRP54 NUDCD1 SNX9 NONO GSK3B PABPC1 NPM1 RPL19 PARP1 NCL DDX1 RYBP NOMO3 FKBP1A PPIG PPIH HGS BAG6 DDAH2 CHMP2B SNAP47 SERPING1 PSMA2 ABHD17A MIF4GD NDUFA10 VKORC1 LAS1L H2AFY2 RPS20 CHEK2 TERF1 DCTN2 DDX5 EEF1A1 CAV1 UBE2I SGTA ATP6V1G1 |
| GO:0044449 | contractile fiber part                                      | 1/119     | FKBP1A                                                                                                                                                                                                                                                                                                                                                                                                                                                                                                                                                                                   |
| GO:0098892 | extrinsic component of postsynaptic specialization membrane | 1/119     | KPNA2                                                                                                                                                                                                                                                                                                                                                                                                                                                                                                                                                                                    |
| GO:0098948 | intrinsic component of postsynaptic specialization membrane | 1/119     | ABHD17A                                                                                                                                                                                                                                                                                                                                                                                                                                                                                                                                                                                  |
| GO:0099634 | postsynaptic specialization membrane                        | 2/119     | KPNA2 ABHD17A                                                                                                                                                                                                                                                                                                                                                                                                                                                                                                                                                                            |
| GO:0019898 | extrinsic component of membrane                             | 7/119     | PHB KPNA2 ANXA2 NMT1 SNX9 FKBP1A SGTA                                                                                                                                                                                                                                                                                                                                                                                                                                                                                                                                                    |
| GO:0005905 | clathrin-coated pit                                         | 1/119     | HSPD1                                                                                                                                                                                                                                                                                                                                                                                                                                                                                                                                                                                    |
| GO:0031224 | intrinsic component of membrane                             | 26/119    | YKT6 STX5 ACBD5 PHB ND4L COX2 ACE2 CLEC4G CD209 CLEC4M BCL2L1 MCL1 BCL2 CD9 TMRSS2 IKKBK ANPEP DPP4 CEACAM1 HSPD1 NOMO3 FKBP1A CAMLG ABHD17A VKORC1 CAV1                                                                                                                                                                                                                                                                                                                                                                                                                                 |
| GO:0044455 | mitochondrial membrane part                                 | 5/119     | PHB ND4L COX2 HSPD1 NDUFA10                                                                                                                                                                                                                                                                                                                                                                                                                                                                                                                                                              |
| GO:0044459 | plasma membrane part                                        | 19/119    | YKT6 PHB ACE2 CD209 CLEC4M KPNA2 CD9 TMRSS2 IKKBK ANPEP DPP4 CEACAM1 ANXA2 CHMP4B SNX9 FKBP1A ABHD17A EEF1A1 CAV1                                                                                                                                                                                                                                                                                                                                                                                                                                                                        |
| GO:0070469 | respiratory chain                                           | 3/119     | ND4L COX2 NDUFA10                                                                                                                                                                                                                                                                                                                                                                                                                                                                                                                                                                        |
| GO:0098552 | side of membrane                                            | 8/119     | CD209 CD9 IKKBK ANPEP CHMP4B SNX9 FKBP1A EEF1A1                                                                                                                                                                                                                                                                                                                                                                                                                                                                                                                                          |
| GO:0008021 | synaptic vesicle                                            | 3/119     | BCL2L1 SNAP47 SGTA                                                                                                                                                                                                                                                                                                                                                                                                                                                                                                                                                                       |
| GO:0030672 | synaptic vesicle membrane                                   | 3/119     | BCL2L1 SNAP47 SGTA                                                                                                                                                                                                                                                                                                                                                                                                                                                                                                                                                                       |
| GO:0048786 | presynaptic active zone                                     | 1/119     | PHB                                                                                                                                                                                                                                                                                                                                                                                                                                                                                                                                                                                      |
| GO:0097060 | synaptic membrane                                           | 3/119     | PHB KPNA2 ABHD17A                                                                                                                                                                                                                                                                                                                                                                                                                                                                                                                                                                        |
| GO:0098793 | presynapse                                                  | 5/119     | PHB PPP1CA BCL2L1 SNAP47 SGTA                                                                                                                                                                                                                                                                                                                                                                                                                                                                                                                                                            |
| GO:0098794 | postsynapse                                                 | 11/119    | PSMC2 PHB STAT3 PPP1CA KPNA2 HNRNPA3 DNAJB1 GSK3A GSK3B CHMP2B ABHD17A                                                                                                                                                                                                                                                                                                                                                                                                                                                                                                                   |
| GO:0098845 | postsynaptic endosome                                       | 1/119     | ABHD17A                                                                                                                                                                                                                                                                                                                                                                                                                                                                                                                                                                                  |
| GO:0098850 | extrinsic component of synaptic vesicle membrane            | 1/119     | SGTA                                                                                                                                                                                                                                                                                                                                                                                                                                                                                                                                                                                     |
| GO:0098895 | postsynaptic endosome membrane                              | 1/119     | ABHD17A                                                                                                                                                                                                                                                                                                                                                                                                                                                                                                                                                                                  |
| GO:0098949 | intrinsic component of postsynaptic endosome membrane       | 1/119     | ABHD17A                                                                                                                                                                                                                                                                                                                                                                                                                                                                                                                                                                                  |

| ID         | Description                                  | GeneRatio | geneID                                                                                                                                                                                                                                                                                                                                                                                                                                                                                                                                                                                                                                                                                                       |
|------------|----------------------------------------------|-----------|--------------------------------------------------------------------------------------------------------------------------------------------------------------------------------------------------------------------------------------------------------------------------------------------------------------------------------------------------------------------------------------------------------------------------------------------------------------------------------------------------------------------------------------------------------------------------------------------------------------------------------------------------------------------------------------------------------------|
| GO:0099240 | intrinsic component of synaptic membrane     | 1/119     | ABHD17A                                                                                                                                                                                                                                                                                                                                                                                                                                                                                                                                                                                                                                                                                                      |
| GO:0099243 | extrinsic component of synaptic membrane     | 2/119     | PHB KPNA2                                                                                                                                                                                                                                                                                                                                                                                                                                                                                                                                                                                                                                                                                                    |
| GO:0005622 | intracellular                                | 114/119   | BTF3 SCFD1 PSMC2 TFEB TWF2 YKT6 KPNB1 STX5 STAT5A RSL24D1 ACBD5 PHB JUN STAT3 PPP1CA SPECC1 FGL2 XPO1 TGFB1 SMAD3 ATF5 ND4L COX2 HNRNPA1 ACE2 CD209 CLEC4M IRF3 KPNA2 SFTPD PPIA BCL2L1 BCL2L2 MCL1 BCL2A1 BCL2 SKP2 KPNA4 PRKRA CD9 IKBKB ANPEP ZCRB1 DPP4 SYNCRIP PTBP1 CEACAM1 ANXA2 HNRNPA2B1 HNRNPA3 ACO2 DNAJB1 HSPD1 HSPA9 COPB2 RPL13A EIF3E EIF3I NMT1 CHMP4B EIF3F GBF1 RRM2 KIF11 PSMD1 SRP54 NUDCD1 NACA SNX9 NONO GSK3A GSK3B PABPC1 PABPC4 NPM1 G3BP1 G3BP2 RPL19 PARP1 NCL DDX1 RYBP NOMO3 FKBP1A PPIG MARK3 PPIH RCAN3 HGS BAG6 DDAH2 CAMLG CHMP2B SNAP47 MKRN2 SERPING1 PSMA2 ABHD17A PFDN5 MIF4GD NDUFA10 VKORC1 LAS1L H2AFY2 RPS20 CHEK2 TERF1 DCTN2 DDX5 EEF1A1 CAV1 UBE2I SGTA ATP6V1G1 |
| GO:0005642 | annulate lamellae                            | 1/119     | XPO1                                                                                                                                                                                                                                                                                                                                                                                                                                                                                                                                                                                                                                                                                                         |
| GO:0008287 | protein serine/threonine phosphatase complex | 1/119     | PPP1CA                                                                                                                                                                                                                                                                                                                                                                                                                                                                                                                                                                                                                                                                                                       |
| GO:0009986 | cell surface                                 | 10/119    | PHB TGFB1 ACE2 CD209 CD9 ANPEP DPP4 CEACAM1 ANXA2 HSPD1                                                                                                                                                                                                                                                                                                                                                                                                                                                                                                                                                                                                                                                      |
| GO:0012505 | endomembrane system                          | 42/119    | SCFD1 PSMC2 YKT6 KPNB1 STX5 PHB FGL2 XPO1 TGFB1 SMAD3 SFTPD PPIA BCL2L1 BCL2 KPNA4 CD9 ANPEP SYNCRIP CEACAM1 ANXA2 HSPD1 COPB2 CHMP4B GBF1 PSMD1 SNX9 PARP1 NOMO3 FKBP1A HGS CAMLG CHMP2B SNAP47 SERPING1 PSMA2 ABHD17A VKORC1 CHEK2 EEF1A1 CAV1 UBE2I SGTA                                                                                                                                                                                                                                                                                                                                                                                                                                                  |
| GO:0030427 | site of polarized growth                     | 2/119     | TWF2 DCTN2                                                                                                                                                                                                                                                                                                                                                                                                                                                                                                                                                                                                                                                                                                   |
| GO:0030496 | midbody                                      | 2/119     | ANXA2 CHMP4B                                                                                                                                                                                                                                                                                                                                                                                                                                                                                                                                                                                                                                                                                                 |
| GO:0031252 | cell leading edge                            | 6/119     | TWF2 DPP4 ANXA2 GBF1 SNX9 EEF1A1                                                                                                                                                                                                                                                                                                                                                                                                                                                                                                                                                                                                                                                                             |
| GO:0031975 | envelope                                     | 18/119    | KPNB1 PHB STAT3 XPO1 SMAD3 ND4L COX2 BCL2L1 BCL2L2 MCL1 BCL2A1 BCL2 KPNA4 HSPD1 CHMP4B PARP1 NDUFA10 UBE2I                                                                                                                                                                                                                                                                                                                                                                                                                                                                                                                                                                                                   |
| GO:0035749 | myelin sheath adaxonal region                | 1/119     | ANXA2                                                                                                                                                                                                                                                                                                                                                                                                                                                                                                                                                                                                                                                                                                        |
| GO:0042995 | cell projection                              | 22/119    | PSMC2 TWF2 YKT6 PPP1CA TGFB1 ACE2 DPP4 CEACAM1 ANXA2 HNRNPA3 DNAJB1 SNX9 GSK3A GSK3B MARK3 SNAP47 ABHD17A DCTN2 C11orf74 EEF1A1 CAV1 UBE2I                                                                                                                                                                                                                                                                                                                                                                                                                                                                                                                                                                   |
| GO:0043209 | myelin sheath                                | 6/119     | PHB BCL2 ANXA2 ACO2 HSPD1 NDUFA10                                                                                                                                                                                                                                                                                                                                                                                                                                                                                                                                                                                                                                                                            |
| GO:0043218 | compact myelin                               | 1/119     | ANXA2                                                                                                                                                                                                                                                                                                                                                                                                                                                                                                                                                                                                                                                                                                        |
| GO:0043220 | Schmidt-Lanterman incisure                   | 1/119     | ANXA2                                                                                                                                                                                                                                                                                                                                                                                                                                                                                                                                                                                                                                                                                                        |
| GO:0044297 | cell body                                    | 7/119     | YKT6 PPP1CA TGFB1 DNAJB1 GSK3A G3BP1 SNAP47                                                                                                                                                                                                                                                                                                                                                                                                                                                                                                                                                                                                                                                                  |
| GO:0044424 | intracellular part                           | 113/119   | BTF3 SCFD1 PSMC2 TFEB TWF2 YKT6 KPNB1 STX5 STAT5A RSL24D1 ACBD5 PHB JUN STAT3 PPP1CA SPECC1 FGL2 XPO1 TGFB1 SMAD3 ATF5 ND4L COX2 HNRNPA1 ACE2 CD209 CLEC4M IRF3 KPNA2 SFTPD PPIA BCL2L1 BCL2L2 MCL1 BCL2A1 BCL2 SKP2 KPNA4 PRKRA CD9 IKBKB ANPEP ZCRB1 DPP4 SYNCRIP PTBP1 CEACAM1 ANXA2 HNRNPA2B1 HNRNPA3 ACO2 DNAJB1 HSPD1 HSPA9 COPB2 RPL13A EIF3E EIF3I NMT1 CHMP4B EIF3F GBF1 RRM2 KIF11 PSMD1 SRP54 NUDCD1 NACA SNX9 NONO GSK3A GSK3B PABPC1 PABPC4 NPM1 G3BP1 G3BP2 RPL19 PARP1 NCL DDX1 RYBP NOMO3 FKBP1A PPIG MARK3 PPIH RCAN3 HGS BAG6 DDAH2 CAMLG CHMP2B SNAP47 SERPING1 PSMA2 ABHD17A PFDN5 MIF4GD NDUFA10 VKORC1 LAS1L H2AFY2 RPS20 CHEK2 TERF1 DCTN2 DDX5 EEF1A1 CAV1 UBE2I SGTA ATP6V1G1       |
| GO:0044463 | cell projection part                         | 16/119    | PSMC2 TWF2 YKT6 PPP1CA ACE2 DPP4 CEACAM1 DNAJB1 GSK3A GSK3B MARK3 SNAP47 ABHD17A DCTN2 EEF1A1 UBE2I                                                                                                                                                                                                                                                                                                                                                                                                                                                                                                                                                                                                          |

| ID         | Description                             | GeneRatio | geneID                                                                                                                                                                                                    |
|------------|-----------------------------------------|-----------|-----------------------------------------------------------------------------------------------------------------------------------------------------------------------------------------------------------|
| GO:0045177 | apical part of cell                     | 3/119     | CD9 DPP4 CEACAM1                                                                                                                                                                                          |
| GO:0045178 | basal part of cell                      | 1/119     | CEACAM1                                                                                                                                                                                                   |
| GO:0071944 | cell periphery                          | 33/119    | SCFD1 YKT6 PHB STAT3 PPP1CA TGFB1 SMAD3 ACE2 CLEC4G CD209 CLEC4M KPNA2 CD9 TMRSS2 IKBKB ANPEP DPP4 CEACAM1 ANXA2 HSPD1 NMT1 CHMP4B SNX9 GSK3B NCL FKBP1A MARK3 CHMP2B SNAP47 ABHD17A EEF1A1 CAV1 ATP6V1G1 |
| GO:0097223 | sperm part                              | 2/119     | DNAJB1 CAV1                                                                                                                                                                                               |
| GO:0097458 | neuron part                             | 20/119    | PSMC2 TWF2 YKT6 PHB STAT3 PPP1CA TGFB1 BCL2L1 HNRNPA3 DNAJB1 GSK3A GSK3B G3BP1 MARK3 CHMP2B SNAP47 ABHD17A DCTN2 UBE2I SGTA                                                                               |
| GO:0098862 | cluster of actin-based cell projections | 2/119     | TWF2 ACE2                                                                                                                                                                                                 |
| GO:1990204 | oxidoreductase complex                  | 2/119     | ND4L NDUFA10                                                                                                                                                                                              |
| GO:0044456 | synapse part                            | 14/119    | PSMC2 PHB STAT3 PPP1CA KPNA2 BCL2L1 HNRNPA3 DNAJB1 GSK3A GSK3B CHMP2B SNAP47 ABHD17A SGTA                                                                                                                 |
| GO:0098685 | Schaffer collateral - CA1 synapse       | 1/119     | STAT3                                                                                                                                                                                                     |
| GO:0098978 | glutamatergic synapse                   | 9/119     | PHB STAT3 PPP1CA KPNA2 DNAJB1 GSK3B CHMP2B SNAP47 ABHD17A                                                                                                                                                 |
| GO:0098982 | GABA-ergic synapse                      | 1/119     | PHB                                                                                                                                                                                                       |
| GO:0098984 | neuron to neuron synapse                | 6/119     | PHB STAT3 HNRNPA3 DNAJB1 CHMP2B ABHD17A                                                                                                                                                                   |
| GO:0099081 | supramolecular polymer                  | 5/119     | TWF2 SPECC1 KIF11 FKBP1A DCTN2                                                                                                                                                                            |

## 1.2.3 BIOLOGICAL PROCESS

| ID         | Description                         | GeneRatio | geneID                                                                                                                                                                                                                                                                                                                                                                                                                                                                                                                                                      |
|------------|-------------------------------------|-----------|-------------------------------------------------------------------------------------------------------------------------------------------------------------------------------------------------------------------------------------------------------------------------------------------------------------------------------------------------------------------------------------------------------------------------------------------------------------------------------------------------------------------------------------------------------------|
| GO:0019953 | sexual reproduction                 | 7/119     | STAT3 TGFB1 BCL2L1 BCL2L2 BCL2 CD9 BAG6                                                                                                                                                                                                                                                                                                                                                                                                                                                                                                                     |
| GO:0022414 | reproductive process                | 10/119    | TFEB PHB STAT3 TGFB1 BCL2L1 BCL2L2 BCL2 CD9 BAG6 TERF1                                                                                                                                                                                                                                                                                                                                                                                                                                                                                                      |
| GO:0032504 | multicellular organism reproduction | 6/119     | TGFB1 BCL2L1 BCL2L2 BCL2 CD9 BAG6                                                                                                                                                                                                                                                                                                                                                                                                                                                                                                                           |
| GO:0055114 | oxidation-reduction process         | 9/119     | PPP1CA ND4L COX2 ACO2 RRM2 GSK3A GSK3B NDUFA10 VKORC1                                                                                                                                                                                                                                                                                                                                                                                                                                                                                                       |
| GO:0006807 | nitrogen compound metabolic process | 90/119    | BTF3 PSMC2 TFEB KPNB1 STX5 STAT5A RSL24D1 PHB JUN STAT3 PPP1CA FGL2 XPO1 TGFB1 SMAD3 ATF5 ND4L COX2 HNRNPA1 ACE2 IRF3 KPNA2 SFTPD PPIA BCL2 SKP2 PRKRA TMRSS2 IKBKB ANPEP ZCRB1 DPP4 SYNCRIP PTBP1 CEACAM1 ANXA2 HNRNPA2B1 HNRNPA3 DNAJB1 HSPD1 RPL13A EIF3E EIF3I NMT1 CHMP4B EIF3F RRM2 PSMD1 SNX9 NONO GSK3A GSK3B PABPC1 PABPC4 NPM1 G3BP1 G3BP2 RPL19 PARP1 NCL DDX1 RYBP FKBP1A PPIG MARK3 PPIH RCAN3 HGS BAG6 DDAH2 MKRN2 TPSAB1 SERPING1 MKRN3 PSMA2 ABHD17A PFDN5 MIF4GD NDUFA10 VKORC1 LAS1L H2AFY2 RPS20 CHEK2 TERF1 DDX5 EEF1A1 CAV1 UBE2I SGTA |
| GO:0009056 | catabolic process                   | 45/119    | SCFD1 PSMC2 TFEB KPNB1 STX5 ACBD5 PHB STAT3 PPP1CA XPO1 TGFB1 SMAD3 MCL1 BCL2 SKP2 ANPEP SYNCRIP CEACAM1 ANXA2 RPL13A EIF3E CHMP4B PSMD1 SNX9 GSK3A GSK3B PABPC1 PABPC4 NPM1 RPL19 RYBP HGS                                                                                                                                                                                                                                                                                                                                                                 |

| ID         | Description                              | GeneRatio | geneID                                                                                                                                                                                                                                                                                                                                                                                                                                                                                                                                                                                    |
|------------|------------------------------------------|-----------|-------------------------------------------------------------------------------------------------------------------------------------------------------------------------------------------------------------------------------------------------------------------------------------------------------------------------------------------------------------------------------------------------------------------------------------------------------------------------------------------------------------------------------------------------------------------------------------------|
|            |                                          |           | BAG6 DDAH2 CHMP2B PSMA2 ABHD17A RPS20 CHEK2 DDX5 EEF1A1 CAV1 UBE2I SGTA ATP6V1G1                                                                                                                                                                                                                                                                                                                                                                                                                                                                                                          |
| GO:0009058 | biosynthetic process                     | 58/119    | BTF3 PSMC2 TFEB KPNB1 STAT5A RSL24D1 PHB JUN STAT3 PPP1CA XPO1 TGFB1 SMAD3 ATF5 COX2 HNRNPA1 ACE2 IRF3 SFTPD PPIA BCL2 IKKBK SYNCRIP CEACAM1 HNRNPA2B1 DNAJB1 HSPD1 RPL13A EIF3E EIF3I NMT1 EIF3F GBF1 RRM2 NONO GSK3A GSK3B PABPC1 PABPC4 NPM1 G3BP2 RPL19 PARP1 NCL DDX1 RYBP DDAH2 ABHD17A PFDN5 MIF4GD H2AFY2 RPS20 CHEK2 TERF1 DDX5 EEF1A1 CAV1 UBE2I                                                                                                                                                                                                                                |
| GO:0009892 | negative regulation of metabolic process | 47/119    | SCFD1 PHB JUN STAT3 XPO1 TGFB1 SMAD3 ATF5 HNRNPA1 IRF3 SFTPD MCL1 BCL2 PRKRA IKKBK SYNCRIP PTBP1 CEACAM1 ANXA2 HNRNPA2B1 DNAJB1 HSPD1 RPL13A EIF3E CHMP4B NONO GSK3A GSK3B PABPC1 PABPC4 NPM1 RPL19 PARP1 NCL RYBP FKBP1A BAG6 SERPING1 PFDN5 H2AFY2 RPS20 CHEK2 TERF1 DDX5 CAV1 UBE2I SGTA                                                                                                                                                                                                                                                                                               |
| GO:0009893 | positive regulation of metabolic process | 40/119    | PSMC2 TFEB STX5 PHB JUN STAT3 TGFB1 SMAD3 ATF5 COX2 HNRNPA1 ACE2 IRF3 BCL2 SKP2 IKKBK SYNCRIP PTBP1 ANXA2 HNRNPA2B1 HSPD1 EIF3E SNX9 GSK3A GSK3B PABPC1 NPM1 PARP1 NCL RYBP FKBP1A HGS BAG6 DDAH2 MIF4GD CHEK2 DDX5 CAV1 UBE2I SGTA                                                                                                                                                                                                                                                                                                                                                       |
| GO:0019222 | regulation of metabolic process          | 68/119    | SCFD1 PSMC2 TFEB KPNB1 STX5 STAT5A PHB JUN STAT3 PPP1CA XPO1 TGFB1 SMAD3 ATF5 COX2 HNRNPA1 ACE2 IRF3 KPNA2 SFTPD MCL1 BCL2 SKP2 PRKRA IKKBK SYNCRIP PTBP1 CEACAM1 ANXA2 HNRNPA2B1 DNAJB1 HSPD1 RPL13A EIF3E CHMP4B RRM2 PSMD1 SNX9 NONO GSK3A GSK3B PABPC1 PABPC4 NPM1 G3BP2 RPL19 PARP1 NCL DDX1 RYBP FKBP1A RCAN3 HGS BAG6 DDAH2 SERPING1 PFDN5 MIF4GD H2AFY2 RPS20 CHEK2 TERF1 DDX5 EEF1A1 CAV1 UBE2I SGTA ATP6V1G1                                                                                                                                                                    |
| GO:0019748 | secondary metabolic process              | 1/119     | BCL2                                                                                                                                                                                                                                                                                                                                                                                                                                                                                                                                                                                      |
| GO:0032259 | methylation                              | 1/119     | PARP1                                                                                                                                                                                                                                                                                                                                                                                                                                                                                                                                                                                     |
| GO:0032963 | collagen metabolic process               | 1/119     | TGFB1                                                                                                                                                                                                                                                                                                                                                                                                                                                                                                                                                                                     |
| GO:0042440 | pigment metabolic process                | 1/119     | BCL2                                                                                                                                                                                                                                                                                                                                                                                                                                                                                                                                                                                      |
| GO:0042445 | hormone metabolic process                | 1/119     | ACE2                                                                                                                                                                                                                                                                                                                                                                                                                                                                                                                                                                                      |
| GO:0044033 | multi-organism metabolic process         | 1/119     | ANXA2                                                                                                                                                                                                                                                                                                                                                                                                                                                                                                                                                                                     |
| GO:0044237 | cellular metabolic process               | 95/119    | BTF3 SCFD1 PSMC2 TFEB KPNB1 STAT5A RSL24D1 ACBD5 PHB JUN STAT3 PPP1CA XPO1 TGFB1 SMAD3 ATF5 ND4L COX2 HNRNPA1 ACE2 IRF3 KPNA2 SFTPD PPIA MCL1 BCL2 SKP2 PRKRA CD9 IKKBK ANPEP ZCRB1 SYNCRIP PTBP1 CEACAM1 ANXA2 HNRNPA2B1 HNRNPA3 ACO2 DNAJB1 HSPD1 HSPA9 RPL13A EIF3E EIF3I NMT1 CHMP4B EIF3F GBF1 RRM2 PSMD1 SNX9 NONO GSK3A GSK3B PABPC1 PABPC4 NPM1 G3BP1 G3BP2 RPL19 PARP1 NCL DDX1 RYBP FKBP1A PPIG MARK3 PPIH RCAN3 HGS BAG6 DDAH2 CAMLG CHMP2B MKRN2 SERPING1 MKRN3 PSMA2 ABHD17A PFDN5 MIF4GD NDUFA10 VKORC1 LAS1L H2AFY2 RPS20 CHEK2 TERF1 DDX5 EEF1A1 CAV1 UBE2I SGTA ATP6V1G1 |
| GO:0044238 | primary metabolic process                | 92/119    | BTF3 PSMC2 TFEB KPNB1 STX5 STAT5A RSL24D1 ACBD5 PHB JUN STAT3 PPP1CA FGL2 XPO1 TGFB1 SMAD3 ATF5 ND4L COX2 HNRNPA1 ACE2 IRF3 KPNA2 SFTPD PPIA BCL2 SKP2 PRKRA TMPRSS2 IKKBK ANPEP ZCRB1 DPP4 SYNCRIP PTBP1 CEACAM1 ANXA2 HNRNPA2B1 HNRNPA3 ACO2 DNAJB1 HSPD1 RPL13A EIF3E EIF3I NMT1 CHMP4B EIF3F RRM2 PSMD1 SNX9 NONO GSK3A GSK3B PABPC1 PABPC4 NPM1 G3BP1 G3BP2 RPL19 PARP1 NCL DDX1 RYBP FKBP1A PPIG MARK3 PPIH RCAN3 HGS BAG6 DDAH2 MKRN2 TPSAB1 SERPING1 MKRN3 PSMA2 ABHD17A PFDN5 MIF4GD NDUFA10 VKORC1 LAS1L H2AFY2 RPS20 CHEK2 TERF1 DDX5 EEF1A1 CAV1 UBE2I SGTA                   |
| GO:0044281 | small molecule metabolic process         | 19/119    | KPNB1 STAT5A ACBD5 STAT3 PPP1CA TGFB1 ND4L COX2 CEACAM1 ACO2 NMT1 RRM2 GSK3A GSK3B PARP1 DDAH2 NDUFA10 VKORC1 CAV1                                                                                                                                                                                                                                                                                                                                                                                                                                                                        |
| GO:0071704 | organic substance metabolic process      | 94/119    | BTF3 PSMC2 TFEB KPNB1 STX5 STAT5A RSL24D1 ACBD5 PHB JUN STAT3 PPP1CA FGL2 XPO1 TGFB1 SMAD3 ATF5 ND4L COX2 HNRNPA1 ACE2 IRF3 KPNA2 SFTPD PPIA BCL2 SKP2 PRKRA CD9 TMPRSS2 IKKBK ANPEP ZCRB1 DPP4 SYNCRIP PTBP1 CEACAM1 ANXA2 HNRNPA2B1 HNRNPA3 ACO2 DNAJB1 HSPD1 RPL13A EIF3E EIF3I NMT1 CHMP4B EIF3F RRM2 PSMD1 SNX9 NONO GSK3A GSK3B PABPC1 PABPC4 NPM1 G3BP1 G3BP2 RPL19 PARP1 NCL DDX1                                                                                                                                                                                                 |

| ID         | Description                                         | GeneRatio | geneID                                                                                                                                                                                                                  |
|------------|-----------------------------------------------------|-----------|-------------------------------------------------------------------------------------------------------------------------------------------------------------------------------------------------------------------------|
|            |                                                     |           | RYBP FKBP1A PPIG MARK3 PPIH RCAN3 HGS BAG6 DDAH2 CAMLG MKRN2<br>TPSAB1 SERPING1 MKRN3 PSMA2 ABHD17A PFDN5 MIF4GD NDUFA10 VKORC1<br>LAS1L H2AFY2 RPS20 CHEK2 TERF1 DDX5 EEF1A1 CAV1 UBE2I SGTA                           |
| GO:1990845 | adaptive thermogenesis                              | 1/119     | CAV1                                                                                                                                                                                                                    |
| GO:0001909 | leukocyte mediated cytotoxicity                     | 1/119     | CEACAM1                                                                                                                                                                                                                 |
| GO:0031341 | regulation of cell killing                          | 1/119     | CEACAM1                                                                                                                                                                                                                 |
| GO:0031342 | negative regulation of cell killing                 | 1/119     | CEACAM1                                                                                                                                                                                                                 |
| GO:0001776 | leukocyte homeostasis                               | 2/119     | TGFB1 BCL2                                                                                                                                                                                                              |
| GO:0002200 | somatic diversification of immune receptors         | 2/119     | TGFB1 HSPD1                                                                                                                                                                                                             |
| GO:0002252 | immune effector process                             | 21/119    | PSMC2 KPNB1 PHB STAT3 FGL2 TGFB1 CLEC4G IRF3 PPIA BCL2 SKP2 ANPEP<br>CEACAM1 ANXA2 HSPD1 GBF1 PSMD1 DDX1 SERPING1 PSMA2 EEF1A1                                                                                          |
| GO:0002253 | activation of immune response                       | 12/119    | PHB CD209 IRF3 SFTPD BCL2 IKBKB CEACAM1 HSPD1 NONO BAG6 SERPING1<br>CAV1                                                                                                                                                |
| GO:0002262 | myeloid cell homeostasis                            | 2/119     | STAT3 HSPA9                                                                                                                                                                                                             |
| GO:0002440 | production of molecular mediator of immune response | 3/119     | TGFB1 HSPD1 DDX1                                                                                                                                                                                                        |
| GO:0002507 | tolerance induction                                 | 1/119     | TGFB1                                                                                                                                                                                                                   |
| GO:0002520 | immune system development                           | 11/119    | JUN STAT3 TGFB1 SMAD3 BCL2 CEACAM1 ANXA2 HSPD1 HSPA9 PABPC4<br>PARP1                                                                                                                                                    |
| GO:0002682 | regulation of immune system process                 | 21/119    | PHB JUN STAT3 TGFB1 SMAD3 CLEC4G CD209 IRF3 SFTPD BCL2 IKBKB DPP4<br>CEACAM1 HSPD1 HSPA9 NONO DDX1 FKBP1A BAG6 SERPING1 CAV1                                                                                            |
| GO:0002683 | negative regulation of immune system process        | 6/119     | TGFB1 CLEC4G SFTPD CEACAM1 HSPA9 SERPING1                                                                                                                                                                               |
| GO:0002684 | positive regulation of immune system process        | 17/119    | PHB JUN STAT3 TGFB1 CD209 IRF3 SFTPD BCL2 IKBKB DPP4 CEACAM1 HSPD1<br>NONO DDX1 BAG6 SERPING1 CAV1                                                                                                                      |
| GO:0006955 | immune response                                     | 35/119    | PSMC2 TFEB KPNB1 PHB JUN STAT3 FGL2 TGFB1 SMAD3 CLEC4G CD209<br>CLEC4M IRF3 SFTPD PPIA BCL2 SKP2 PRKRA IKBKB ANPEP SYNCRIP CEACAM1<br>ANXA2 HSPD1 RPL13A GBF1 PSMD1 NONO DDX1 FKBP1A BAG6 SERPING1<br>PSMA2 EEF1A1 CAV1 |
| GO:0019882 | antigen processing and presentation                 | 5/119     | CD209 CLEC4M IKBKB KIF11 DCTN2                                                                                                                                                                                          |
| GO:0031294 | lymphocyte costimulation                            | 2/119     | DPP4 CAV1                                                                                                                                                                                                               |
| GO:0045058 | T cell selection                                    | 2/119     | STAT3 BCL2                                                                                                                                                                                                              |
| GO:0045321 | leukocyte activation                                | 23/119    | PSMC2 KPNB1 JUN STAT3 FGL2 TGFB1 SMAD3 CLEC4G CD209 SFTPD PPIA BCL2<br>ANPEP DPP4 CEACAM1 ANXA2 HSPD1 PSMD1 FKBP1A BAG6 PSMA2 EEF1A1<br>CAV1                                                                            |
| GO:0050900 | leukocyte migration                                 | 6/119     | TGFB1 SFTPD PPIA CEACAM1 GBF1 CAV1                                                                                                                                                                                      |
| GO:0016049 | cell growth                                         | 8/119     | TWF2 PHB TGFB1 SMAD3 BCL2 CEACAM1 GSK3A GSK3B                                                                                                                                                                           |
| GO:0040008 | regulation of growth                                | 11/119    | TWF2 STAT5A PHB STAT3 TGFB1 SMAD3 BCL2L1 BCL2 CEACAM1 GSK3A<br>GSK3B                                                                                                                                                    |

| ID         | Description                                  | GeneRatio | geneID                                                                                                                                          |
|------------|----------------------------------------------|-----------|-------------------------------------------------------------------------------------------------------------------------------------------------|
| GO:0045926 | negative regulation of growth                | 5/119     | PHB TGFB1 SMAD3 BCL2 GSK3A                                                                                                                      |
| GO:0045927 | positive regulation of growth                | 2/119     | TWF2 BCL2                                                                                                                                       |
| GO:0048589 | developmental growth                         | 10/119    | TWF2 STAT5A STAT3 TGFB1 SMAD3 ATF5 BCL2 ANXA2 GSK3A GSK3B                                                                                       |
| GO:0002209 | behavioral defense response                  | 2/119     | BCL2 DPP4                                                                                                                                       |
| GO:0007611 | learning or memory                           | 1/119     | JUN                                                                                                                                             |
| GO:0007626 | locomotory behavior                          | 1/119     | DPP4                                                                                                                                            |
| GO:0007631 | feeding behavior                             | 2/119     | STAT3 ACE2                                                                                                                                      |
| GO:0035640 | exploration behavior                         | 1/119     | DPP4                                                                                                                                            |
| GO:0050795 | regulation of behavior                       | 1/119     | STAT3                                                                                                                                           |
| GO:0061744 | motor behavior                               | 1/119     | DPP4                                                                                                                                            |
| GO:0008284 | positive regulation of cell proliferation    | 11/119    | STAT5A JUN STAT3 TGFB1 CD209 BCL2L1 BCL2 SKP2 DPP4 ANXA2 NPM1                                                                                   |
| GO:0008285 | negative regulation of cell proliferation    | 15/119    | PHB JUN STAT3 TGFB1 SMAD3 ATF5 CLEC4G SFTPD BCL2 PRKRA CD9 CEACAM1 NPM1 HGS CAV1                                                                |
| GO:0033002 | muscle cell proliferation                    | 3/119     | JUN STAT3 SKP2                                                                                                                                  |
| GO:0033687 | osteoblast proliferation                     | 2/119     | SMAD3 BCL2                                                                                                                                      |
| GO:0035726 | common myeloid progenitor cell proliferation | 1/119     | CEACAM1                                                                                                                                         |
| GO:0042127 | regulation of cell proliferation             | 23/119    | STAT5A PHB JUN STAT3 TGFB1 SMAD3 ATF5 ACE2 CLEC4G CD209 SFTPD BCL2L1 BCL2 SKP2 PRKRA CD9 DPP4 CEACAM1 ANXA2 NPM1 HGS BAG6 CAV1                  |
| GO:0048144 | fibroblast proliferation                     | 3/119     | JUN TGFB1 ANXA2                                                                                                                                 |
| GO:0050673 | epithelial cell proliferation                | 8/119     | STAT5A JUN STAT3 TGFB1 SMAD3 BCL2L2 CEACAM1 CAV1                                                                                                |
| GO:0061351 | neural precursor cell proliferation          | 2/119     | TGFB1 ATF5                                                                                                                                      |
| GO:0070661 | leukocyte proliferation                      | 6/119     | TGFB1 CLEC4G CD209 SFTPD BCL2 HSPD1                                                                                                             |
| GO:0072089 | stem cell proliferation                      | 1/119     | TGFB1                                                                                                                                           |
| GO:0007059 | chromosome segregation                       | 6/119     | KPNB1 CHMP4B BAG6 CHMP2B TERF1 UBE2I                                                                                                            |
| GO:0007017 | microtubule-based process                    | 11/119    | KPNB1 XPO1 ATF5 CHMP4B KIF11 GSK3B NPM1 MARK3 CHMP2B CHEK2 DCTN2                                                                                |
| GO:0000075 | cell cycle checkpoint                        | 3/119     | TGFB1 BCL2L1 CHEK2                                                                                                                              |
| GO:0000920 | septum digestion after cytokinesis           | 1/119     | CHMP2B                                                                                                                                          |
| GO:0001775 | cell activation                              | 25/119    | PSMC2 KPNB1 JUN STAT3 FGL2 TGFB1 SMAD3 CLEC4G CD209 SFTPD PPIA BCL2 CD9 ANPEP DPP4 CEACAM1 ANXA2 HSPD1 GBF1 PSMD1 FKBP1A BAG6 PSMA2 EEF1A1 CAV1 |
| GO:0006457 | protein folding                              | 9/119     | PPIA DNAJB1 HSPD1 HSPA9 FKBP1A PPIG PPIH PFDN5 SGTA                                                                                             |

| ID         | Description                                                         | GeneRatio | geneID                                                                                                                                                                                                                                                                                                                                                                                                   |
|------------|---------------------------------------------------------------------|-----------|----------------------------------------------------------------------------------------------------------------------------------------------------------------------------------------------------------------------------------------------------------------------------------------------------------------------------------------------------------------------------------------------------------|
| GO:0007165 | signal transduction                                                 | 53/119    | KPNB1 STAT5A PHB JUN STAT3 PPP1CA TGFB1 SMAD3 HNRNPA1 CD209 CLEC4M IRF3 KPNA2 SFTPD PPIA BCL2L1 BCL2L2 MCL1 BCL2A1 BCL2 SKP2 PRKRA CD9 IKBKB PTBP1 CEACAM1 ANXA2 HNRNPA2B1 HSPD1 HSPA9 NMT1 GBF1 NONO GSK3A GSK3B NPM1 G3BP1 G3BP2 PARP1 DDX1 FKBP1A MARK3 RCAN3 HGS BAG6 DDAH2 CAMLG PFDN5 CHEK2 DDX5 CAV1 UBE2I ATP6V1G1                                                                               |
| GO:0006903 | vesicle targeting                                                   | 4/119     | SCFD1 YKT6 STX5 GBF1                                                                                                                                                                                                                                                                                                                                                                                     |
| GO:0006928 | movement of cell or subcellular component                           | 15/119    | KPNB1 STAT5A JUN STAT3 TGFB1 SMAD3 SFTPD PPIA BCL2 CD9 DPP4 CEACAM1 GBF1 KIF11 CAV1                                                                                                                                                                                                                                                                                                                      |
| GO:0007049 | cell cycle                                                          | 24/119    | KPNB1 JUN STAT3 PPP1CA XPO1 TGFB1 SMAD3 ATF5 BCL2L1 BCL2 SKP2 CHMP4B GBF1 RRM2 KIF11 SNX9 NPM1 RYBP BAG6 CHMP2B CHEK2 TERF1 DCTN2 UBE2I                                                                                                                                                                                                                                                                  |
| GO:0007154 | cell communication                                                  | 55/119    | KPNB1 STAT5A PHB JUN STAT3 PPP1CA TGFB1 SMAD3 HNRNPA1 CD209 CLEC4M IRF3 KPNA2 SFTPD PPIA BCL2L1 BCL2L2 MCL1 BCL2A1 BCL2 SKP2 PRKRA CD9 IKBKB DPP4 PTBP1 CEACAM1 ANXA2 HNRNPA2B1 HSPD1 HSPA9 NMT1 GBF1 NONO GSK3A GSK3B NPM1 G3BP1 G3BP2 PARP1 DDX1 FKBP1A MARK3 RCAN3 HGS BAG6 DDAH2 CAMLG SNAP47 PFDN5 CHEK2 DDX5 CAV1 UBE2I ATP6V1G1                                                                   |
| GO:0007163 | establishment or maintenance of cell polarity                       | 3/119     | GBF1 GSK3B MARK3                                                                                                                                                                                                                                                                                                                                                                                         |
| GO:0007272 | ensheathment of neurons                                             | 2/119     | TGFB1 CD9                                                                                                                                                                                                                                                                                                                                                                                                |
| GO:0008219 | cell death                                                          | 33/119    | KPNB1 PHB JUN STAT3 PPP1CA TGFB1 SMAD3 ATF5 COX2 IRF3 BCL2L1 BCL2L2 MCL1 BCL2A1 BCL2 SKP2 PRKRA IKBKB HSPD1 HSPA9 NMT1 CHMP4B NONO GSK3A GSK3B NPM1 PARP1 RYBP BAG6 DDAH2 CHEK2 DDX5 CAV1                                                                                                                                                                                                                |
| GO:0008037 | cell recognition                                                    | 2/119     | CD209 CLEC4M                                                                                                                                                                                                                                                                                                                                                                                             |
| GO:0016043 | cellular component organization                                     | 66/119    | SCFD1 PSMC2 TFEB TWF2 YKT6 KPNB1 STX5 RSL24D1 PHB JUN STAT3 PPP1CA SPECC1 XPO1 TGFB1 SMAD3 ATF5 HNRNPA1 ACE2 SFTPD PPIA BCL2L1 BCL2 CD9 IKBKB DPP4 CEACAM1 ANXA2 HNRNPA2B1 DNAJB1 HSPD1 HSPA9 RPL13A EIF3E EIF3I NMT1 CHMP4B EIF3F GBF1 KIF11 SRP54 SNX9 GSK3A GSK3B NPM1 G3BP1 G3BP2 PARP1 DDX1 RYBP FKBP1A MARK3 PPIH HGS BAG6 CHMP2B SNAP47 TPSAB1 ABHD17A NDUFA10 H2AFY2 CHEK2 TERF1 DCTN2 CAV1 SGTA |
| GO:0016458 | gene silencing                                                      | 7/119     | STAT3 TGFB1 SMAD3 PRKRA HNRNPA2B1 PABPC1 DDX5                                                                                                                                                                                                                                                                                                                                                            |
| GO:0019725 | cellular homeostasis                                                | 10/119    | TGFB1 SMAD3 MCL1 BCL2 ANXA2 FKBP1A CHMP2B TERF1 CAV1 ATP6V1G1                                                                                                                                                                                                                                                                                                                                            |
| GO:0022402 | cell cycle process                                                  | 19/119    | KPNB1 XPO1 TGFB1 SMAD3 ATF5 BCL2L1 BCL2 SKP2 CHMP4B RRM2 KIF11 SNX9 NPM1 RYBP BAG6 CHMP2B CHEK2 TERF1 DCTN2                                                                                                                                                                                                                                                                                              |
| GO:0022406 | membrane docking                                                    | 4/119     | SCFD1 YKT6 STX5 DCTN2                                                                                                                                                                                                                                                                                                                                                                                    |
| GO:0022412 | cellular process involved in reproduction in multicellular organism | 4/119     | TGFB1 BCL2L1 BCL2 CD9                                                                                                                                                                                                                                                                                                                                                                                    |
| GO:0030029 | actin filament-based process                                        | 7/119     | TWF2 SPECC1 TGFB1 SMAD3 BCL2 IKBKB CAV1                                                                                                                                                                                                                                                                                                                                                                  |
| GO:0032940 | secretion by cell                                                   | 21/119    | SCFD1 PSMC2 YKT6 KPNB1 FGL2 TGFB1 IRF3 PPIA CD9 ANPEP DPP4 CEACAM1 ANXA2 HSPD1 PSMD1 GSK3B HGS SNAP47 SERPING1 PSMA2 EEF1A1                                                                                                                                                                                                                                                                              |
| GO:0033059 | cellular pigmentation                                               | 2/119     | BCL2 DCTN2                                                                                                                                                                                                                                                                                                                                                                                               |
| GO:0044764 | multi-organism cellular process                                     | 2/119     | IRF3 PPIA                                                                                                                                                                                                                                                                                                                                                                                                |
| GO:0048522 | positive regulation of cellular process                             | 54/119    | PSMC2 TFEB TWF2 STAT5A PHB JUN STAT3 PPP1CA TGFB1 SMAD3 ATF5 COX2 HNRNPA1 ACE2 CD209 IRF3 SFTPD PPIA BCL2L1 MCL1 BCL2 SKP2 PRKRA IKBKB DPP4 PTBP1 CEACAM1 ANXA2 HNRNPA2B1 HSPD1 EIF3E NMT1 SNX9 GSK3A GSK3B PABPC1 NPM1 PARP1 NCL DDX1 RYBP FKBP1A HGS BAG6 DDAH2 SNAP47 MIF4GD H2AFY2 CHEK2 TERF1 DDX5 CAV1 UBE2I SGTA                                                                                  |



| ID         | Description                                                                               | GeneRatio | geneID                                                                                                                                                                                                                                                                                                                                                                                                                                                                                                                               |
|------------|-------------------------------------------------------------------------------------------|-----------|--------------------------------------------------------------------------------------------------------------------------------------------------------------------------------------------------------------------------------------------------------------------------------------------------------------------------------------------------------------------------------------------------------------------------------------------------------------------------------------------------------------------------------------|
| GO:0048523 | negative regulation of cellular process                                                   | 57/119    | SCFD1 TWF2 PHB JUN STAT3 XPO1 TGFB1 SMAD3 ATF5 HNRNPA1 CLEC4G IRF3 SFTPD BCL2L1 BCL2L2 MCL1 BCL2A1 BCL2 PRKRA CD9 IKBKB DPP4 SYNCRIP PTBP1 CEACAM1 ANXA2 HNRNPA2B1 DNAJB1 HSPD1 HSPA9 RPL13A EIF3E CHMP4B RRM2 NONO GSK3A GSK3B PABPC1 NPM1 G3BP1 PARP1 NCL RYBP FKBP1A MARK3 HGS BAG6 DDAH2 SERPING1 PFDN5 H2AFY2 CHEK2 TERF1 DDX5 CAV1 UBE2I SGTA                                                                                                                                                                                  |
| GO:0048869 | cellular developmental process                                                            | 30/119    | SCFD1 PSMC2 TWF2 PHB JUN STAT3 TGFB1 SMAD3 ATF5 BCL2L1 MCL1 BCL2 CD9 IKBKB ANPEP SYNCRIP PTBP1 CEACAM1 ANXA2 HSPA9 GSK3A GSK3B PABPC4 NPM1 PARP1 BAG6 H2AFY2 CHEK2 DDX5 CAV1                                                                                                                                                                                                                                                                                                                                                         |
| GO:0050794 | regulation of cellular process                                                            | 86/119    | SCFD1 PSMC2 TFEB TWF2 KPNB1 STX5 STAT5A PHB JUN STAT3 PPP1CA XPO1 TGFB1 SMAD3 ATF5 COX2 HNRNPA1 ACE2 CLEC4G CD209 CLEC4M IRF3 KPNA2 SFTPD PPIA BCL2L1 BCL2L2 MCL1 BCL2A1 BCL2 SKP2 PRKRA CD9 IKBKB DPP4 SYNCRIP PTBP1 CEACAM1 ANXA2 HNRNPA2B1 DNAJB1 HSPD1 HSPA9 RPL13A EIF3E NMT1 CHMP4B GBF1 RRM2 KIF11 SNX9 NONO GSK3A GSK3B PABPC1 PABPC4 NPM1 G3BP1 G3BP2 PARP1 NCL DDX1 RYBP FKBP1A MARK3 RCAN3 HGS BAG6 DDAH2 CAMLG CHMP2B SNAP47 SERPING1 ABHD17A PFDN5 MIF4GD H2AFY2 CHEK2 TERF1 DCTN2 DDX5 EEF1A1 CAV1 UBE2I SGTA ATP6V1G1 |
| GO:0051301 | cell division                                                                             | 10/119    | PPP1CA TGFB1 BCL2L1 CHMP4B KIF11 SNX9 CHMP2B CHEK2 TERF1 UBE2I                                                                                                                                                                                                                                                                                                                                                                                                                                                                       |
| GO:0051651 | maintenance of location in cell                                                           | 2/119     | TWF2 CAV1                                                                                                                                                                                                                                                                                                                                                                                                                                                                                                                            |
| GO:0051716 | cellular response to stimulus                                                             | 60/119    | TWF2 KPNB1 STAT5A PHB JUN STAT3 PPP1CA TGFB1 SMAD3 HNRNPA1 CD209 CLEC4M IRF3 KPNA2 SFTPD PPIA BCL2L1 BCL2L2 MCL1 BCL2A1 BCL2 SKP2 PRKRA CD9 IKBKB SYNCRIP PTBP1 CEACAM1 ANXA2 HNRNPA2B1 DNAJB1 HSPD1 HSPA9 RPL13A NMT1 GBF1 NONO GSK3A GSK3B NPM1 G3BP1 G3BP2 PARP1 NCL DDX1 FKBP1A MARK3 RCAN3 HGS BAG6 DDAH2 CAMLG PFDN5 CHEK2 DDX5 EEF1A1 CAV1 UBE2I SGTA ATP6V1G1                                                                                                                                                                |
| GO:0060352 | cell adhesion molecule production                                                         | 1/119     | CAV1                                                                                                                                                                                                                                                                                                                                                                                                                                                                                                                                 |
| GO:0061919 | process utilizing autophagic mechanism                                                    | 11/119    | SCFD1 TFEB ACBD5 MCL1 BCL2 CHMP4B GSK3A HGS CHMP2B EEF1A1 ATP6V1G1                                                                                                                                                                                                                                                                                                                                                                                                                                                                   |
| GO:0071804 | cellular potassium ion transport                                                          | 1/119     | CAV1                                                                                                                                                                                                                                                                                                                                                                                                                                                                                                                                 |
| GO:0097194 | execution phase of apoptosis                                                              | 2/119     | KPNB1 BCL2L1                                                                                                                                                                                                                                                                                                                                                                                                                                                                                                                         |
| GO:0140029 | exocytic process                                                                          | 3/119     | SCFD1 YKT6 SNAP47                                                                                                                                                                                                                                                                                                                                                                                                                                                                                                                    |
| GO:0006808 | regulation of nitrogen utilization                                                        | 1/119     | BCL2                                                                                                                                                                                                                                                                                                                                                                                                                                                                                                                                 |
| GO:0003006 | developmental process involved in reproduction                                            | 6/119     | TFEB PHB TGFB1 BCL2L1 BCL2L2 BCL2                                                                                                                                                                                                                                                                                                                                                                                                                                                                                                    |
| GO:0009566 | fertilization                                                                             | 2/119     | BCL2L1 CD9                                                                                                                                                                                                                                                                                                                                                                                                                                                                                                                           |
| GO:0044703 | multi-organism reproductive process                                                       | 7/119     | STAT3 TGFB1 BCL2L1 BCL2L2 BCL2 CD9 BAG6                                                                                                                                                                                                                                                                                                                                                                                                                                                                                              |
| GO:0048609 | multicellular organismal reproductive process                                             | 5/119     | TGFB1 BCL2L1 BCL2L2 BCL2 BAG6                                                                                                                                                                                                                                                                                                                                                                                                                                                                                                        |
| GO:0051321 | meiotic cell cycle                                                                        | 2/119     | BAG6 TERF1                                                                                                                                                                                                                                                                                                                                                                                                                                                                                                                           |
| GO:0060011 | Sertoli cell proliferation                                                                | 1/119     | BCL2L2                                                                                                                                                                                                                                                                                                                                                                                                                                                                                                                               |
| GO:0090220 | chromosome localization to nuclear envelope involved in homologous chromosome segregation | 1/119     | TERF1                                                                                                                                                                                                                                                                                                                                                                                                                                                                                                                                |
| GO:1903046 | meiotic cell cycle process                                                                | 2/119     | BAG6 TERF1                                                                                                                                                                                                                                                                                                                                                                                                                                                                                                                           |

| ID         | Description                                 | GeneRatio | geneID                                                                                                                                                                                                                                                       |
|------------|---------------------------------------------|-----------|--------------------------------------------------------------------------------------------------------------------------------------------------------------------------------------------------------------------------------------------------------------|
| GO:0007155 | cell adhesion                               | 15/119    | PPP1CA TGFB1 SMAD3 CLEC4G CD209 CLEC4M SFTPD BCL2 CD9 DPP4 CEACAM1 ANXA2 HSPD1 GSK3B CAV1                                                                                                                                                                    |
| GO:0044406 | adhesion of symbiont to host                | 4/119     | ACE2 CD209 CLEC4M SFTPD                                                                                                                                                                                                                                      |
| GO:0007267 | cell-cell signaling                         | 11/119    | STAT3 PPP1CA SMAD3 KPNA2 DPP4 GSK3A GSK3B G3BP1 SNAP47 PFDN5 CAV1                                                                                                                                                                                            |
| GO:0023051 | regulation of signaling                     | 39/119    | PHB JUN STAT3 PPP1CA TGFB1 SMAD3 ACE2 IRF3 BCL2L1 BCL2L2 MCL1 BCL2A1 BCL2 SKP2 PRKRA IKBKB DPP4 PTBP1 CEACAM1 ANXA2 NMT1 GBF1 NONO GSK3A GSK3B G3BP1 PARP1 DDX1 FKBP1A MARK3 RCAN3 HGS CAMLG SNAP47 PFDN5 CHEK2 DDX5 CAV1 UBE2I                              |
| GO:0023056 | positive regulation of signaling            | 25/119    | PHB JUN STAT3 PPP1CA TGFB1 SMAD3 IRF3 BCL2L1 MCL1 BCL2 SKP2 PRKRA IKBKB PTBP1 ANXA2 NMT1 GSK3A GSK3B PARP1 DDX1 FKBP1A SNAP47 DDX5 CAV1 UBE2I                                                                                                                |
| GO:0023057 | negative regulation of signaling            | 17/119    | PHB TGFB1 SMAD3 BCL2L1 BCL2L2 MCL1 BCL2A1 BCL2 CEACAM1 NONO GSK3A GSK3B G3BP1 MARK3 HGS PFDN5 CAV1                                                                                                                                                           |
| GO:0035637 | multicellular organismal signaling          | 2/119     | ACE2 CAV1                                                                                                                                                                                                                                                    |
| GO:0001503 | ossification                                | 7/119     | PSMC2 PHB TGFB1 SMAD3 BCL2 SYNCRIP DDX5                                                                                                                                                                                                                      |
| GO:0001763 | morphogenesis of a branching structure      | 3/119     | PPP1CA TGFB1 BCL2                                                                                                                                                                                                                                            |
| GO:0001816 | cytokine production                         | 8/119     | TGFB1 SMAD3 ACE2 IRF3 SFTPD CEACAM1 HSPD1 DDX1                                                                                                                                                                                                               |
| GO:0003008 | system process                              | 12/119    | JUN TGFB1 SMAD3 ACE2 BCL2 CEACAM1 GSK3A GSK3B PARP1 CHMP2B SERPING1 CAV1                                                                                                                                                                                     |
| GO:0007275 | multicellular organism development          | 44/119    | TFEB TWf2 STAT5A PHB JUN STAT3 PPP1CA TGFB1 SMAD3 ATF5 COX2 SFTPD BCL2L1 BCL2L2 MCL1 BCL2A1 BCL2 PRKRA CD9 IKBKB ANPEP CEACAM1 ANXA2 ACO2 DNAJB1 HSPD1 HSPA9 NMT1 GSK3A GSK3B PABPC4 RPL19 PARP1 NCL DDX1 RYBP FKBP1A HGS BAG6 PFDN5 VKORC1 H2AFY2 DDX5 CAV1 |
| GO:0007389 | pattern specification process               | 1/119     | SMAD3                                                                                                                                                                                                                                                        |
| GO:0007585 | respiratory gaseous exchange                | 1/119     | SFTPD                                                                                                                                                                                                                                                        |
| GO:0009791 | post-embryonic development                  | 2/119     | ATF5 BCL2                                                                                                                                                                                                                                                    |
| GO:0019827 | stem cell population maintenance            | 1/119     | STAT3                                                                                                                                                                                                                                                        |
| GO:0022404 | molting cycle process                       | 1/119     | BCL2                                                                                                                                                                                                                                                         |
| GO:0032922 | circadian regulation of gene expression     | 1/119     | PPP1CA                                                                                                                                                                                                                                                       |
| GO:0033555 | multicellular organismal response to stress | 2/119     | BCL2 DPP4                                                                                                                                                                                                                                                    |
| GO:0034381 | plasma lipoprotein particle clearance       | 1/119     | ANXA2                                                                                                                                                                                                                                                        |
| GO:0035264 | multicellular organism growth               | 4/119     | STAT5A STAT3 ATF5 BCL2                                                                                                                                                                                                                                       |
| GO:0035265 | organ growth                                | 3/119     | BCL2 ANXA2 GSK3A                                                                                                                                                                                                                                             |
| GO:0042303 | molting cycle                               | 1/119     | BCL2                                                                                                                                                                                                                                                         |
| GO:0044706 | multi-multicellular organism process        | 2/119     | TGFB1 BCL2                                                                                                                                                                                                                                                   |

| ID         | Description                                                                 | GeneRatio | geneID                                                                                                                                                                                                                                                                         |
|------------|-----------------------------------------------------------------------------|-----------|--------------------------------------------------------------------------------------------------------------------------------------------------------------------------------------------------------------------------------------------------------------------------------|
| GO:0048771 | tissue remodeling                                                           | 3/119     | TGFB1 CEACAM1 CAV1                                                                                                                                                                                                                                                             |
| GO:0048871 | multicellular organismal homeostasis                                        | 5/119     | STAT3 SFTPD BCL2 CHMP4B CAV1                                                                                                                                                                                                                                                   |
| GO:0050817 | coagulation                                                                 | 7/119     | CD9 CEACAM1 ANXA2 PABPC4 SERPING1 VKORC1 CAV1                                                                                                                                                                                                                                  |
| GO:0051239 | regulation of multicellular organismal process                              | 27/119    | TWF2 STAT5A JUN STAT3 TGFB1 SMAD3 ACE2 IRF3 SFTPD BCL2 CD9 IKKBK CEACAM1 ANXA2 HSPD1 HSPA9 GSK3A GSK3B PARP1 DDX1 HGS BAG6 SERPING1 VKORC1 H2AFY2 DDX5 CAV1                                                                                                                    |
| GO:0051240 | positive regulation of multicellular organismal process                     | 17/119    | TWF2 STAT5A JUN STAT3 TGFB1 SMAD3 ACE2 IRF3 BCL2 CEACAM1 ANXA2 HSPD1 GSK3A PARP1 DDX1 H2AFY2 CAV1                                                                                                                                                                              |
| GO:0051241 | negative regulation of multicellular organismal process                     | 14/119    | STAT3 TGFB1 SMAD3 IRF3 SFTPD BCL2 CD9 CEACAM1 ANXA2 HSPA9 GSK3A GSK3B HGS SERPING1                                                                                                                                                                                             |
| GO:0090130 | tissue migration                                                            | 5/119     | STAT5A JUN TGFB1 DPP4 CEACAM1                                                                                                                                                                                                                                                  |
| GO:0009653 | anatomical structure morphogenesis                                          | 21/119    | SCFD1 TWF2 JUN STAT3 PPP1CA TGFB1 SMAD3 BCL2L1 BCL2 PRKRA CD9 ANPEP CEACAM1 ANXA2 GSK3A GSK3B NCL FKBP1A RCAN3 HGS CAV1                                                                                                                                                        |
| GO:0007568 | aging                                                                       | 8/119     | JUN STAT3 TGFB1 BCL2A1 BCL2 NPM1 SERPING1 CHEK2                                                                                                                                                                                                                                |
| GO:0048646 | anatomical structure formation involved in morphogenesis                    | 12/119    | JUN STAT3 TGFB1 SMAD3 CD9 ANPEP CEACAM1 ANXA2 NCL FKBP1A HGS CAV1                                                                                                                                                                                                              |
| GO:0021700 | developmental maturation                                                    | 1/119     | BCL2                                                                                                                                                                                                                                                                           |
| GO:0044111 | development involved in symbiotic interaction                               | 1/119     | ANXA2                                                                                                                                                                                                                                                                          |
| GO:0048856 | anatomical structure development                                            | 47/119    | SCFD1 TFEF TWF2 STAT5A PHB JUN STAT3 PPP1CA TGFB1 SMAD3 ATF5 COX2 SFTPD BCL2L1 BCL2L2 MCL1 BCL2A1 BCL2 PRKRA CD9 IKKBK ANPEP PTBP1 CEACAM1 ANXA2 ACO2 DNAJB1 HSPD1 HSPA9 NMT1 GSK3A GSK3B PABPC4 RPL19 PARP1 NCL DDX1 RYBP FKBP1A RCAN3 HGS BAG6 PFDN5 VKORC1 H2AFY2 DDX5 CAV1 |
| GO:0050793 | regulation of developmental process                                         | 20/119    | TWF2 STAT5A JUN STAT3 TGFB1 SMAD3 BCL2 IKKBK PTBP1 CEACAM1 ANXA2 HSPA9 GSK3A GSK3B PARP1 HGS BAG6 H2AFY2 DDX5 CAV1                                                                                                                                                             |
| GO:0051093 | negative regulation of developmental process                                | 12/119    | STAT3 TGFB1 SMAD3 BCL2 PTBP1 CEACAM1 ANXA2 HSPA9 GSK3A GSK3B HGS CAV1                                                                                                                                                                                                          |
| GO:0051094 | positive regulation of developmental process                                | 10/119    | TWF2 JUN STAT3 TGFB1 SMAD3 BCL2 CEACAM1 ANXA2 PARP1 H2AFY2                                                                                                                                                                                                                     |
| GO:0098727 | maintenance of cell number                                                  | 1/119     | STAT3                                                                                                                                                                                                                                                                          |
| GO:0040012 | regulation of locomotion                                                    | 10/119    | STAT5A JUN STAT3 TGFB1 SMAD3 BCL2 CEACAM1 CHMP4B CHMP2B CAV1                                                                                                                                                                                                                   |
| GO:0040013 | negative regulation of locomotion                                           | 3/119     | STAT3 TGFB1 BCL2                                                                                                                                                                                                                                                               |
| GO:0040017 | positive regulation of locomotion                                           | 9/119     | STAT5A JUN STAT3 TGFB1 SMAD3 BCL2 CHMP4B CHMP2B CAV1                                                                                                                                                                                                                           |
| GO:0042330 | taxis                                                                       | 4/119     | TGFB1 SMAD3 SFTPD GBF1                                                                                                                                                                                                                                                         |
| GO:0048870 | cell motility                                                               | 12/119    | STAT5A JUN STAT3 TGFB1 SMAD3 SFTPD PPIA BCL2 DPP4 CEACAM1 GBF1 CAV1                                                                                                                                                                                                            |
| GO:0052192 | movement in environment of other organism involved in symbiotic interaction | 3/119     | PPIA CHMP4B CHMP2B                                                                                                                                                                                                                                                             |

| ID         | Description                                                          | GeneRatio | geneID                                                                                                                                                                             |
|------------|----------------------------------------------------------------------|-----------|------------------------------------------------------------------------------------------------------------------------------------------------------------------------------------|
| GO:0048066 | developmental pigmentation                                           | 1/119     | BCL2                                                                                                                                                                               |
| GO:0007623 | circadian rhythm                                                     | 5/119     | JUN PPP1CA ATF5 NONO GSK3B                                                                                                                                                         |
| GO:0043902 | positive regulation of multi-organism process                        | 8/119     | JUN PPIA TMPRSS2 ANXA2 CHMP4B PABPC1 PPIH CHMP2B                                                                                                                                   |
| GO:0044089 | positive regulation of cellular component biogenesis                 | 12/119    | PSMC2 TWF2 JUN TGFB1 SMAD3 ACE2 SNX9 GSK3B PARP1 HGS TERF1 CAV1                                                                                                                    |
| GO:0045785 | positive regulation of cell adhesion                                 | 7/119     | TGFB1 SMAD3 CD209 DPP4 HSPD1 GSK3B CAV1                                                                                                                                            |
| GO:0048087 | positive regulation of developmental pigmentation                    | 1/119     | BCL2                                                                                                                                                                               |
| GO:0048584 | positive regulation of response to stimulus                          | 31/119    | PHB JUN STAT3 PPP1CA TGFB1 SMAD3 CD209 IRF3 SFTPD BCL2L1 MCL1 BCL2 SKP2 PRKRA IKBKB PTBP1 CEACAM1 HSPD1 NMT1 NONO GSK3A GSK3B PARP1 DDX1 FKBP1A BAG6 SERPING1 DDX5 CAV1 UBE2I SGTA |
| GO:0051050 | positive regulation of transport                                     | 14/119    | TGFB1 SMAD3 ACE2 IRF3 SFTPD PPIA BCL2 ANXA2 HSPD1 NMT1 GSK3A GSK3B HGS CAV1                                                                                                        |
| GO:0051091 | positive regulation of DNA-binding transcription factor activity     | 5/119     | TGFB1 SMAD3 IKBKB NPM1 UBE2I                                                                                                                                                       |
| GO:1903829 | positive regulation of cellular protein localization                 | 8/119     | TGFB1 SMAD3 BCL2 NMT1 GSK3A GSK3B PARP1 ABHD17A                                                                                                                                    |
| GO:1904181 | positive regulation of membrane depolarization                       | 1/119     | PARP1                                                                                                                                                                              |
| GO:1904951 | positive regulation of establishment of protein localization         | 9/119     | TGFB1 SMAD3 IRF3 PPIA BCL2 HSPD1 NMT1 GSK3A GSK3B                                                                                                                                  |
| GO:1905954 | positive regulation of lipid localization                            | 1/119     | ANXA2                                                                                                                                                                              |
| GO:0043433 | negative regulation of DNA-binding transcription factor activity     | 1/119     | G3BP2                                                                                                                                                                              |
| GO:0043901 | negative regulation of multi-organism process                        | 2/119     | JUN ANXA2                                                                                                                                                                          |
| GO:0048585 | negative regulation of response to stimulus                          | 23/119    | PHB TGFB1 SMAD3 CLEC4G BCL2L1 BCL2L2 MCL1 BCL2A1 BCL2 CD9 CEACAM1 ANXA2 NONO GSK3A GSK3B G3BP1 MARK3 HGS SERPING1 PFDN5 CHEK2 CAV1 SGTA                                            |
| GO:0051051 | negative regulation of transport                                     | 5/119     | TGFB1 BCL2 CEACAM1 GSK3A CAV1                                                                                                                                                      |
| GO:1900047 | negative regulation of hemostasis                                    | 4/119     | CD9 CEACAM1 ANXA2 SERPING1                                                                                                                                                         |
| GO:1903828 | negative regulation of cellular protein localization                 | 5/119     | TGFB1 BCL2L1 GSK3B ABHD17A TERF1                                                                                                                                                   |
| GO:1904180 | negative regulation of membrane depolarization                       | 1/119     | BCL2                                                                                                                                                                               |
| GO:1904911 | negative regulation of establishment of RNA localization to telomere | 1/119     | TERF1                                                                                                                                                                              |

| ID         | Description                                                                                 | GeneRatio | geneID                                                                                                                                                                                                                                                                                                                                                                                |
|------------|---------------------------------------------------------------------------------------------|-----------|---------------------------------------------------------------------------------------------------------------------------------------------------------------------------------------------------------------------------------------------------------------------------------------------------------------------------------------------------------------------------------------|
| GO:1904914 | negative regulation of establishment of protein-containing complex localization to telomere | 1/119     | TERF1                                                                                                                                                                                                                                                                                                                                                                                 |
| GO:1904950 | negative regulation of establishment of protein localization                                | 1/119     | TERF1                                                                                                                                                                                                                                                                                                                                                                                 |
| GO:0030155 | regulation of cell adhesion                                                                 | 12/119    | TGFB1 SMAD3 CLEC4G CD209 SFTPD BCL2 CD9 DPP4 CEACAM1 HSPD1 GSK3B CAV1                                                                                                                                                                                                                                                                                                                 |
| GO:0032879 | regulation of localization                                                                  | 28/119    | SCFD1 STAT5A JUN STAT3 XPO1 TGFB1 SMAD3 ACE2 IRF3 SFTPD PPIA BCL2L1 BCL2 CD9 DPP4 CEACAM1 ANXA2 HSPD1 NMT1 GBF1 GSK3A GSK3B PARP1 FKBP1A HGS ABHD17A TERF1 CAV1                                                                                                                                                                                                                       |
| GO:0042752 | regulation of circadian rhythm                                                              | 2/119     | PPP1CA NONO                                                                                                                                                                                                                                                                                                                                                                           |
| GO:0043900 | regulation of multi-organism process                                                        | 12/119    | JUN SFTPD PPIA BCL2 TMPRSS2 ANXA2 CHMP4B PABPC1 PPIH CHMP2B DDX5 CAV1                                                                                                                                                                                                                                                                                                                 |
| GO:0044087 | regulation of cellular component biogenesis                                                 | 19/119    | SCFD1 PSMC2 TWF2 JUN TGFB1 SMAD3 ACE2 IKBKB DNAJB1 RPL13A CHMP4B SNX9 GSK3B NPM1 PARP1 HGS CHMP2B TERF1 CAV1                                                                                                                                                                                                                                                                          |
| GO:0048070 | regulation of developmental pigmentation                                                    | 1/119     | BCL2                                                                                                                                                                                                                                                                                                                                                                                  |
| GO:0048518 | positive regulation of biological process                                                   | 63/119    | PSMC2 TFEB TWF2 STX5 STAT5A PHB JUN STAT3 PPP1CA TGFB1 SMAD3 ATF5 COX2 HNRNPA1 ACE2 CD209 IRF3 SFTPD PPIA BCL2L1 MCL1 BCL2 SKP2 PRKRA TMPRSS2 IKBKB DPP4 SYNCRIP PTBP1 CEACAM1 ANXA2 HNRNPA2B1 HSPD1 EIF3E NMT1 CHMP4B SNX9 NONO GSK3A GSK3B PABPC1 NPM1 PARP1 NCL DDX1 RYBP FKBP1A PPIH HGS BAG6 DDAH2 CHMP2B SNAP47 SERPING1 ABHD17A MIF4GD H2AFY2 CHEK2 TERF1 DDX5 CAV1 UBE2I SGTA |
| GO:0048519 | negative regulation of biological process                                                   | 62/119    | SCFD1 TWF2 PHB JUN STAT3 XPO1 TGFB1 SMAD3 ATF5 HNRNPA1 CLEC4G IRF3 SFTPD BCL2L1 BCL2L2 MCL1 BCL2A1 BCL2 PRKRA CD9 IKBKB DPP4 SYNCRIP PTBP1 CEACAM1 ANXA2 HNRNPA2B1 DNAJB1 HSPD1 HSPA9 RPL13A EIF3E CHMP4B RRM2 NONO GSK3A GSK3B PABPC1 PABPC4 NPM1 G3BP1 G3BP2 RPL19 PARP1 NCL RYBP FKBP1A MARK3 HGS BAG6 DDAH2 SERPING1 ABHD17A PFDN5 H2AFY2 RPS20 CHEK2 TERF1 DDX5 CAV1 UBE2I SGTA  |
| GO:0048583 | regulation of response to stimulus                                                          | 47/119    | PHB JUN STAT3 PPP1CA TGFB1 SMAD3 ACE2 CLEC4G CD209 IRF3 SFTPD BCL2L1 BCL2L2 MCL1 BCL2A1 BCL2 SKP2 PRKRA CD9 IKBKB PTBP1 CEACAM1 ANXA2 DNAJB1 HSPD1 NMT1 GBF1 NONO GSK3A GSK3B NPM1 G3BP1 PARP1 DDX1 FKBP1A MARK3 RCAN3 HGS BAG6 SERPING1 PFDN5 VKORC1 CHEK2 DDX5 CAV1 UBE2I SGTA                                                                                                      |
| GO:0097006 | regulation of plasma lipoprotein particle levels                                            | 1/119     | ANXA2                                                                                                                                                                                                                                                                                                                                                                                 |
| GO:0098900 | regulation of action potential                                                              | 1/119     | CAV1                                                                                                                                                                                                                                                                                                                                                                                  |
| GO:1900046 | regulation of hemostasis                                                                    | 6/119     | CD9 CEACAM1 ANXA2 SERPING1 VKORC1 CAV1                                                                                                                                                                                                                                                                                                                                                |
| GO:0006950 | response to stress                                                                          | 49/119    | SCFD1 PHB JUN STAT3 PPP1CA TGFB1 SMAD3 COX2 HNRNPA1 ACE2 CD209 CLEC4M IRF3 SFTPD BCL2L1 BCL2L2 MCL1 BCL2A1 BCL2 SKP2 KPNA4 PRKRA CD9 IKBKB DPP4 SYNCRIP CEACAM1 ANXA2 ACO2 DNAJB1 HSPD1 HSPA9 RPL13A NONO GSK3A GSK3B PABPC4 NPM1 PARP1 DDX1 BAG6 CAMLG TPSAB1 SERPING1 VKORC1 CHEK2 DDX5 CAV1 SGTA                                                                                   |
| GO:0009605 | response to external stimulus                                                               | 25/119    | PHB JUN PPP1CA TGFB1 SMAD3 HNRNPA1 ACE2 IRF3 SFTPD BCL2L1 BCL2 SKP2 PRKRA CD9 IKBKB CEACAM1 ANXA2 HSPD1 NMT1 GBF1 DDX1 SERPING1 PSMA2 VKORC1 CAV1                                                                                                                                                                                                                                     |
| GO:0009607 | response to biotic stimulus                                                                 | 17/119    | JUN TGFB1 SMAD3 IRF3 SFTPD BCL2L1 BCL2 SKP2 PRKRA IKBKB CEACAM1 HSPD1 GBF1 GSK3B DDX1 PSMA2 CAV1                                                                                                                                                                                                                                                                                      |
| GO:0009628 | response to abiotic stimulus                                                                | 20/119    | SCFD1 JUN PPP1CA TGFB1 SMAD3 COX2 BCL2L1 BCL2 CD9 DPP4 DNAJB1 HSPD1 HSPA9 NMT1 GSK3B NPM1 PARP1 CHEK2 CAV1 ATP6V1G1                                                                                                                                                                                                                                                                   |

| ID         | Description                                | GeneRatio | geneID                                                                                                                                                                                                                                                                                                                                                                                                                                                                                                                                                                     |
|------------|--------------------------------------------|-----------|----------------------------------------------------------------------------------------------------------------------------------------------------------------------------------------------------------------------------------------------------------------------------------------------------------------------------------------------------------------------------------------------------------------------------------------------------------------------------------------------------------------------------------------------------------------------------|
| GO:0009719 | response to endogenous stimulus            | 25/119    | STAT5A PHB JUN STAT3 TGFB1 SMAD3 HNRNPA1 BCL2L1 BCL2 SKP2 CD9 PTBP1 CEACAM1 ANXA2 HSPD1 GSK3A GSK3B PARP1 NCL CHEK2 DDX5 EEF1A1 CAV1 UBE2I ATP6V1G1                                                                                                                                                                                                                                                                                                                                                                                                                        |
| GO:0014823 | response to activity                       | 1/119     | HSPD1                                                                                                                                                                                                                                                                                                                                                                                                                                                                                                                                                                      |
| GO:0042221 | response to chemical                       | 51/119    | SCFD1 TWF2 STAT5A PHB JUN STAT3 PPP1CA XPO1 TGFB1 SMAD3 HNRNPA1 IRF3 SFTPD PPIA BCL2L1 MCL1 BCL2 SKP2 KPNA4 PRKRA CD9 IKKKB SYNCRIP PTBP1 CEACAM1 ANXA2 HNRNPA2B1 DNAJB1 HSPD1 HSPA9 RPL13A GBF1 SRP54 NONO GSK3A GSK3B NPM1 PARP1 NCL DDX1 HGS BAG6 VKORC1 CHEK2 TERF1 DDX5 EEF1A1 CAV1 UBE2I SGTA ATP6V1G1                                                                                                                                                                                                                                                               |
| GO:0043500 | muscle adaptation                          | 3/119     | SMAD3 GSK3A PARP1                                                                                                                                                                                                                                                                                                                                                                                                                                                                                                                                                          |
| GO:0043627 | response to estrogen                       | 2/119     | HSPD1 CAV1                                                                                                                                                                                                                                                                                                                                                                                                                                                                                                                                                                 |
| GO:0051606 | detection of stimulus                      | 2/119     | NMT1 PARP1                                                                                                                                                                                                                                                                                                                                                                                                                                                                                                                                                                 |
| GO:0072376 | protein activation cascade                 | 2/119     | PHB SERPING1                                                                                                                                                                                                                                                                                                                                                                                                                                                                                                                                                               |
| GO:0031503 | protein-containing complex localization    | 5/119     | XPO1 HNRNPA2B1 NPM1 SNAP47 TERF1                                                                                                                                                                                                                                                                                                                                                                                                                                                                                                                                           |
| GO:0033036 | macromolecule localization                 | 52/119    | BTF3 SCFD1 TWF2 YKT6 KPNB1 STX5 STAT3 XPO1 TGFB1 SMAD3 HNRNPA1 IRF3 KPNA2 PPIA BCL2L1 MCL1 BCL2 KPNA4 IKKKB DPP4 CEACAM1 ANXA2 HNRNPA2B1 HNRNPA3 HSPD1 COPB2 RPL13A NMT1 CHMP4B GBF1 SRP54 SNX9 GSK3A GSK3B NPM1 G3BP2 RPL19 PARP1 DDX1 FKBP1A HGS BAG6 CHMP2B SNAP47 ABHD17A H2AFY2 RPS20 TERF1 DCTN2 CAV1 SGTA ATP6V1G1                                                                                                                                                                                                                                                  |
| GO:0051234 | establishment of localization              | 64/119    | BTF3 SCFD1 PSMC2 YKT6 KPNB1 STX5 STAT5A PHB STAT3 FGL2 XPO1 TGFB1 SMAD3 COX2 HNRNPA1 ACE2 CD209 CLEC4M IRF3 KPNA2 SFTPD PPIA BCL2L1 MCL1 BCL2 KPNA4 CD9 TMPRSS2 ANPEP DPP4 CEACAM1 ANXA2 HNRNPA2B1 HNRNPA3 HSPD1 COPB2 RPL13A NMT1 CHMP4B GBF1 KIF11 PSMD1 SRP54 SNX9 GSK3A GSK3B NPM1 G3BP2 RPL19 FKBP1A HGS BAG6 CHMP2B SNAP47 SERPING1 PSMA2 H2AFY2 RPS20 TERF1 DCTN2 EEF1A1 CAV1 SGTA ATP6V1G1                                                                                                                                                                         |
| GO:0051235 | maintenance of location                    | 5/119     | TWF2 TGFB1 G3BP2 FKBP1A CAV1                                                                                                                                                                                                                                                                                                                                                                                                                                                                                                                                               |
| GO:0051641 | cellular localization                      | 43/119    | SCFD1 TWF2 YKT6 KPNB1 STX5 STAT3 XPO1 TGFB1 SMAD3 HNRNPA1 KPNA2 BCL2L1 BCL2 KPNA4 IKKKB ANXA2 HNRNPA2B1 HSPD1 COPB2 RPL13A NMT1 CHMP4B GBF1 SRP54 SNX9 GSK3A GSK3B NPM1 RPL19 PARP1 DDX1 FKBP1A HGS BAG6 CHMP2B SNAP47 ABHD17A H2AFY2 RPS20 TERF1 DCTN2 CAV1 SGTA                                                                                                                                                                                                                                                                                                          |
| GO:0051674 | localization of cell                       | 12/119    | STAT5A JUN STAT3 TGFB1 SMAD3 SFTPD PPIA BCL2 DPP4 CEACAM1 GBF1 CAV1                                                                                                                                                                                                                                                                                                                                                                                                                                                                                                        |
| GO:1902579 | multi-organism localization                | 5/119     | KPNB1 XPO1 CD209 CLEC4M CAV1                                                                                                                                                                                                                                                                                                                                                                                                                                                                                                                                               |
| GO:0051707 | response to other organism                 | 15/119    | JUN TGFB1 SMAD3 IRF3 SFTPD BCL2L1 BCL2 SKP2 PRKRA IKKKB HSPD1 GBF1 DDX1 PSMA2 CAV1                                                                                                                                                                                                                                                                                                                                                                                                                                                                                         |
| GO:0044419 | interspecies interaction between organisms | 38/119    | KPNB1 JUN STAT3 XPO1 TGFB1 SMAD3 HNRNPA1 ACE2 CLEC4G CD209 CLEC4M IRF3 KPNA2 SFTPD PPIA BCL2L1 BCL2 KPNA4 TMPRSS2 IKKKB ANPEP DPP4 SYNCRIP PTBP1 ANXA2 HSPD1 CHMP4B EIF3F GBF1 PABPC1 NPM1 PPIH CAMLG CHMP2B DDX5 CAV1 UBE2I SGTA                                                                                                                                                                                                                                                                                                                                          |
| GO:0050789 | regulation of biological process           | 92/119    | SCFD1 PSMC2 TFEF TWF2 KPNB1 STX5 STAT5A PHB JUN STAT3 PPP1CA XPO1 TGFB1 SMAD3 ATF5 COX2 HNRNPA1 ACE2 CLEC4G CD209 CLEC4M IRF3 KPNA2 SFTPD PPIA BCL2L1 BCL2L2 MCL1 BCL2A1 BCL2 SKP2 PRKRA CD9 TMPRSS2 IKKKB DPP4 SYNCRIP PTBP1 CEACAM1 ANXA2 HNRNPA2B1 DNAJB1 HSPD1 HSPA9 RPL13A EIF3E NMT1 CHMP4B GBF1 RRM2 KIF11 PSMD1 SNX9 NONO GSK3A GSK3B PABPC1 PABPC4 NPM1 G3BP1 G3BP2 RPL19 PARP1 NCL DDX1 RYBP FKBP1A MARK3 PPIH RCAN3 HGS BAG6 DDAH2 CAMLG CHMP2B SNAP47 SERPING1 ABHD17A PFDN5 MIF4GD VKORC1 H2AFY2 RPS20 CHEK2 TERF1 DCTN2 DDX5 EEF1A1 CAV1 UBE2I SGTA ATP6V1G1 |
| GO:0065008 | regulation of biological quality           | 46/119    | TWF2 STAT5A PHB JUN STAT3 PPP1CA XPO1 TGFB1 SMAD3 COX2 HNRNPA1 ACE2 SFTPD BCL2L1 MCL1 BCL2 PRKRA CD9 DPP4 SYNCRIP CEACAM1 ANXA2 HNRNPA2B1 HSPD1 HSPA9 NMT1 CHMP4B GSK3A GSK3B PABPC1 PABPC4                                                                                                                                                                                                                                                                                                                                                                                |

| ID         | Description                      | GeneRatio | geneID                                                                                                                                                                                                                                                                           |
|------------|----------------------------------|-----------|----------------------------------------------------------------------------------------------------------------------------------------------------------------------------------------------------------------------------------------------------------------------------------|
|            |                                  |           | NPM1 G3BP2 PARP1 FKBP1A BAG6 DDAH2 CHMP2B SNAP47 SERPING1<br>ABHD17A VKORC1 CHEK2 TERF1 CAV1 ATP6V1G1                                                                                                                                                                            |
| GO:0065009 | regulation of molecular function | 31/119    | JUN STAT3 PPP1CA TGFB1 SMAD3 SFTPD BCL2 PRKRA IKBKB CEACAM1<br>ANXA2 HNRNPA2B1 DNAJB1 HSPD1 EIF3E PSMD1 SNX9 GSK3A GSK3B NPM1<br>G3BP2 PARP1 FKBP1A MARK3 RCAN3 HGS DDAH2 SERPING1 TERF1 CAV1<br>UBE2I                                                                           |
| GO:0044085 | cellular component biogenesis    | 45/119    | SCFD1 PSMC2 TWF2 KPNB1 STX5 RSL24D1 JUN XPO1 TGFB1 SMAD3 ACE2 BCL2<br>CD9 IKBKB ANXA2 DNAJB1 HSPD1 HSPA9 RPL13A EIF3E EIF3I CHMP4B EIF3F<br>KIF11 SRP54 SNX9 GSK3B NPM1 G3BP1 G3BP2 PARP1 DDX1 FKBP1A PPIH HGS<br>BAG6 CHMP2B SNAP47 NDUFA10 LAS1L H2AFY2 CHEK2 TERF1 DCTN2 CAV1 |

# 2 HCOV-CLUSTER\_SET

## 2.1 GO CLASSIFICATION

Functional Profile of a gene set at specific GO level. Genes are classified according to their GO distribution at a specific level.

### MOLECULAR FUNCTION

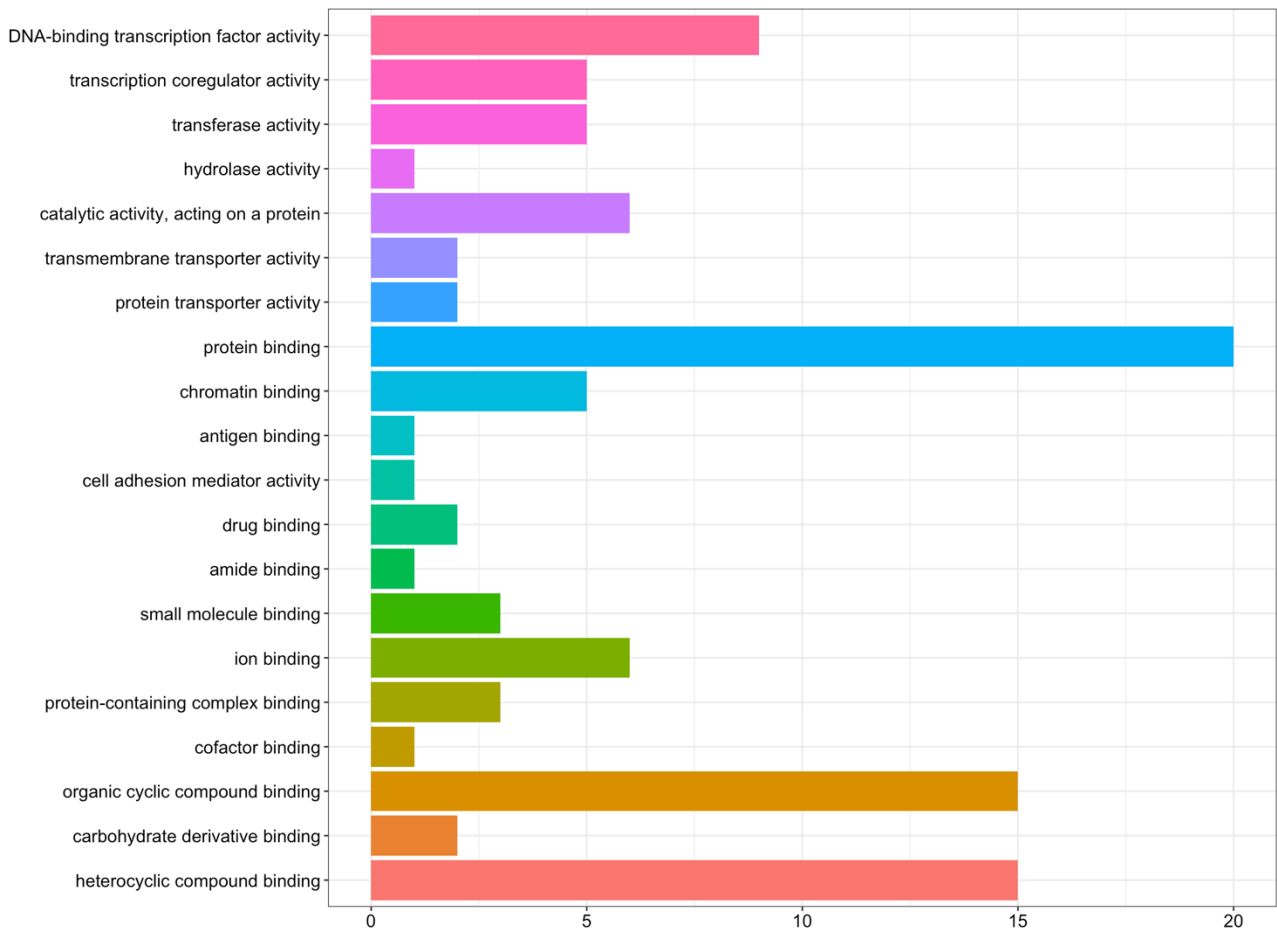



# CELLULAR COMPONENT

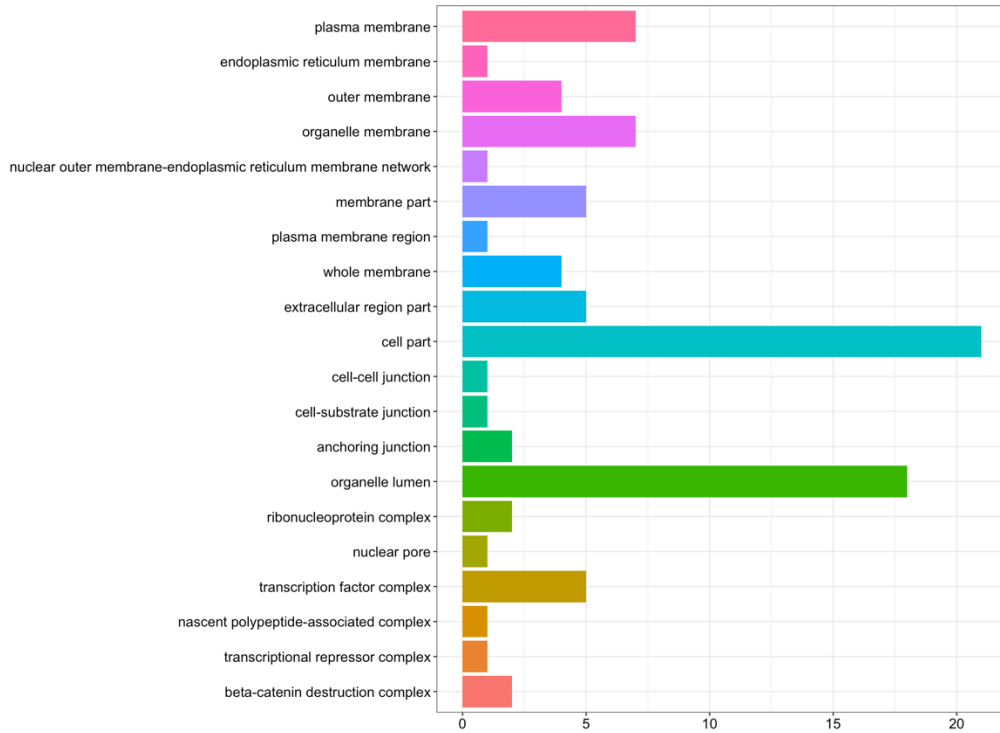

# BIOLOGICAL PROCESS

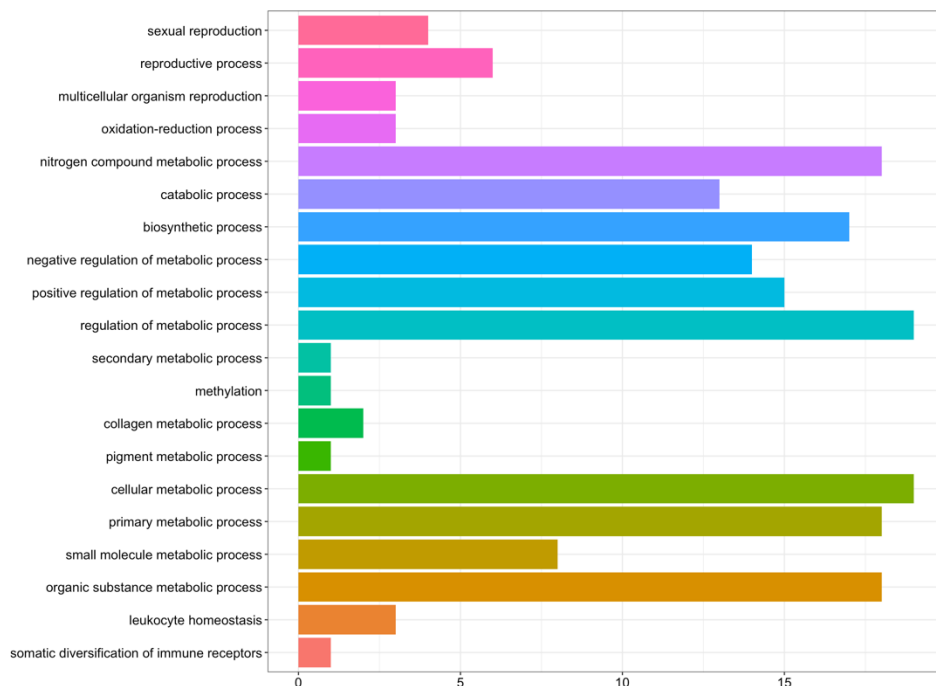

## 2.2 TABLES CLASSIFICATION

### 2.2.1 MOLECULAR FUNCTION

| ID         | Description                                                             | GeneRatio | geneID                                                                                                        |
|------------|-------------------------------------------------------------------------|-----------|---------------------------------------------------------------------------------------------------------------|
| GO:0003700 | DNA-binding transcription factor activity                               | 9/21      | TFEB STAT5A PHB JUN STAT3 SMAD3 ATF5 IRF3 PARP1                                                               |
| GO:0003712 | transcription coregulator activity                                      | 5/21      | JUN SMAD3 ATF5 IRF3 NPM1                                                                                      |
| GO:0016740 | transferase activity                                                    | 5/21      | STAT5A SKP2 GSK3A GSK3B PARP1                                                                                 |
| GO:0016787 | hydrolase activity                                                      | 1/21      | PPP1CA                                                                                                        |
| GO:0140096 | catalytic activity, acting on a protein                                 | 6/21      | STAT5A PPP1CA SKP2 GSK3A GSK3B PARP1                                                                          |
| GO:0022857 | transmembrane transporter activity                                      | 2/21      | MCL1 BCL2                                                                                                     |
| GO:0008565 | protein transporter activity                                            | 2/21      | KPNB1 MCL1                                                                                                    |
| GO:0005515 | protein binding                                                         | 20/21     | TFEB KPNB1 STAT5A PHB JUN STAT3 PPP1CA TGFB1 SMAD3 ATF5 IRF3 BCL2L1 MCL1 BCL2 SKP2 GSK3A GSK3B NPM1 PARP1 IL6 |
| GO:0003682 | chromatin binding                                                       | 5/21      | JUN STAT3 SMAD3 ATF5 NPM1                                                                                     |
| GO:0003823 | antigen binding                                                         | 1/21      | TGFB1                                                                                                         |
| GO:0098631 | cell adhesion mediator activity                                         | 1/21      | PPP1CA                                                                                                        |
| GO:0008144 | drug binding                                                            | 2/21      | GSK3A GSK3B                                                                                                   |
| GO:0033218 | amide binding                                                           | 1/21      | KPNB1                                                                                                         |
| GO:0036094 | small molecule binding                                                  | 3/21      | GSK3A GSK3B PARP1                                                                                             |
| GO:0043167 | ion binding                                                             | 6/21      | KPNB1 PPP1CA SMAD3 GSK3A GSK3B PARP1                                                                          |
| GO:0044877 | protein-containing complex binding                                      | 3/21      | PPP1CA SMAD3 NPM1                                                                                             |
| GO:0048037 | cofactor binding                                                        | 1/21      | PARP1                                                                                                         |
| GO:0097159 | organic cyclic compound binding                                         | 15/21     | TFEB KPNB1 STAT5A PHB JUN STAT3 SMAD3 ATF5 IRF3 BCL2 NACA GSK3A GSK3B NPM1 PARP1                              |
| GO:0097367 | carbohydrate derivative binding                                         | 2/21      | GSK3A GSK3B                                                                                                   |
| GO:1901363 | heterocyclic compound binding                                           | 15/21     | TFEB KPNB1 STAT5A PHB JUN STAT3 SMAD3 ATF5 IRF3 BCL2 NACA GSK3A GSK3B NPM1 PARP1                              |
| GO:0016247 | channel regulator activity                                              | 1/21      | BCL2                                                                                                          |
| GO:0030234 | enzyme regulator activity                                               | 3/21      | JUN TGFB1 NPM1                                                                                                |
| GO:0030545 | receptor regulator activity                                             | 2/21      | TGFB1 IL6                                                                                                     |
| GO:0005072 | transforming growth factor beta receptor, cytoplasmic mediator activity | 1/21      | SMAD3                                                                                                         |

## 2.2.2 CELLULAR COMPONENT

| ID         | Description                                                   | GeneRatio | geneID                                                                                                             |
|------------|---------------------------------------------------------------|-----------|--------------------------------------------------------------------------------------------------------------------|
| GO:0005886 | plasma membrane                                               | 7/21      | PHB STAT3 PPP1CA TGFB1 SMAD3 GSK3B IL6                                                                             |
| GO:0005789 | endoplasmic reticulum membrane                                | 1/21      | BCL2                                                                                                               |
| GO:0019867 | outer membrane                                                | 4/21      | PHB BCL2L1 MCL1 BCL2                                                                                               |
| GO:0031090 | organelle membrane                                            | 7/21      | KPNB1 PHB STAT3 SMAD3 BCL2L1 MCL1 BCL2                                                                             |
| GO:0042175 | nuclear outer membrane-endoplasmic reticulum membrane network | 1/21      | BCL2                                                                                                               |
| GO:0044425 | membrane part                                                 | 5/21      | PHB BCL2L1 MCL1 BCL2 IL6                                                                                           |
| GO:0098590 | plasma membrane region                                        | 1/21      | PHB                                                                                                                |
| GO:0098805 | whole membrane                                                | 4/21      | PHB BCL2L1 MCL1 BCL2                                                                                               |
| GO:0044421 | extracellular region part                                     | 5/21      | KPNB1 PHB PPP1CA TGFB1 IL6                                                                                         |
| GO:0044464 | cell part                                                     | 21/21     | TFEB KPNB1 STAT5A PHB JUN STAT3 PPP1CA TGFB1 SMAD3 ATF5 IRF3 BCL2L1 MCL1 BCL2 SKP2 NACA GSK3A GSK3B NPM1 PARP1 IL6 |
| GO:0005911 | cell-cell junction                                            | 1/21      | PPP1CA                                                                                                             |
| GO:0030055 | cell-substrate junction                                       | 1/21      | NPM1                                                                                                               |
| GO:0070161 | anchoring junction                                            | 2/21      | PPP1CA NPM1                                                                                                        |
| GO:0043233 | organelle lumen                                               | 18/21     | KPNB1 STAT5A PHB JUN STAT3 PPP1CA TGFB1 SMAD3 ATF5 IRF3 BCL2L1 MCL1 BCL2 SKP2 GSK3B NPM1 PARP1 IL6                 |
| GO:1990904 | ribonucleoprotein complex                                     | 2/21      | KPNB1 NPM1                                                                                                         |
| GO:0005643 | nuclear pore                                                  | 1/21      | KPNB1                                                                                                              |
| GO:0005667 | transcription factor complex                                  | 5/21      | JUN STAT3 SMAD3 ATF5 PARP1                                                                                         |
| GO:0005854 | nascent polypeptide-associated complex                        | 1/21      | NACA                                                                                                               |
| GO:0017053 | transcriptional repressor complex                             | 1/21      | JUN                                                                                                                |
| GO:0030877 | beta-catenin destruction complex                              | 2/21      | GSK3A GSK3B                                                                                                        |
| GO:0032993 | protein-DNA complex                                           | 2/21      | NPM1 PARP1                                                                                                         |
| GO:0043235 | receptor complex                                              | 2/21      | SMAD3 IL6                                                                                                          |
| GO:0071141 | SMAD protein complex                                          | 1/21      | SMAD3                                                                                                              |
| GO:0097136 | Bcl-2 family protein complex                                  | 2/21      | BCL2L1 MCL1                                                                                                        |
| GO:0098796 | membrane protein complex                                      | 2/21      | BCL2 IL6                                                                                                           |
| GO:1902494 | catalytic complex                                             | 2/21      | PPP1CA SKP2                                                                                                        |
| GO:1990909 | Wnt signalosome                                               | 1/21      | GSK3B                                                                                                              |

| ID         | Description                                  | GeneRatio | geneID                                                                                                             |
|------------|----------------------------------------------|-----------|--------------------------------------------------------------------------------------------------------------------|
| GO:0043227 | membrane-bounded organelle                   | 21/21     | TFEB KPNB1 STAT5A PHB JUN STAT3 PPP1CA TGFB1 SMAD3 ATF5 IRF3 BCL2L1 MCL1 BCL2 SKP2 NACA GSK3A GSK3B NPM1 PARP1 IL6 |
| GO:0043228 | non-membrane-bounded organelle               | 11/21     | KPNB1 JUN STAT3 PPP1CA SMAD3 ATF5 BCL2L1 SKP2 GSK3B NPM1 PARP1                                                     |
| GO:0043229 | intracellular organelle                      | 21/21     | TFEB KPNB1 STAT5A PHB JUN STAT3 PPP1CA TGFB1 SMAD3 ATF5 IRF3 BCL2L1 MCL1 BCL2 SKP2 NACA GSK3A GSK3B NPM1 PARP1 IL6 |
| GO:0043230 | extracellular organelle                      | 3/21      | KPNB1 PHB PPP1CA                                                                                                   |
| GO:0044422 | organelle part                               | 18/21     | KPNB1 STAT5A PHB JUN STAT3 PPP1CA TGFB1 SMAD3 ATF5 IRF3 BCL2L1 MCL1 BCL2 SKP2 GSK3B NPM1 PARP1 IL6                 |
| GO:0099572 | postsynaptic specialization                  | 2/21      | PHB STAT3                                                                                                          |
| GO:0018995 | host                                         | 1/21      | KPNB1                                                                                                              |
| GO:0044217 | other organism part                          | 1/21      | KPNB1                                                                                                              |
| GO:0044216 | other organism cell                          | 1/21      | KPNB1                                                                                                              |
| GO:0005615 | extracellular space                          | 5/21      | KPNB1 PHB PPP1CA TGFB1 IL6                                                                                         |
| GO:0031012 | extracellular matrix                         | 1/21      | TGFB1                                                                                                              |
| GO:0072562 | blood microparticle                          | 1/21      | TGFB1                                                                                                              |
| GO:0044446 | intracellular organelle part                 | 18/21     | KPNB1 STAT5A PHB JUN STAT3 PPP1CA TGFB1 SMAD3 ATF5 IRF3 BCL2L1 MCL1 BCL2 SKP2 GSK3B NPM1 PARP1 IL6                 |
| GO:0019898 | extrinsic component of membrane              | 1/21      | PHB                                                                                                                |
| GO:0031224 | intrinsic component of membrane              | 5/21      | PHB BCL2L1 MCL1 BCL2 IL6                                                                                           |
| GO:0044455 | mitochondrial membrane part                  | 1/21      | PHB                                                                                                                |
| GO:0044459 | plasma membrane part                         | 2/21      | PHB IL6                                                                                                            |
| GO:0008021 | synaptic vesicle                             | 1/21      | BCL2L1                                                                                                             |
| GO:0030672 | synaptic vesicle membrane                    | 1/21      | BCL2L1                                                                                                             |
| GO:0048786 | presynaptic active zone                      | 1/21      | PHB                                                                                                                |
| GO:0097060 | synaptic membrane                            | 1/21      | PHB                                                                                                                |
| GO:0098793 | presynapse                                   | 3/21      | PHB PPP1CA BCL2L1                                                                                                  |
| GO:0098794 | postsynapse                                  | 5/21      | PHB STAT3 PPP1CA GSK3A GSK3B                                                                                       |
| GO:0099243 | extrinsic component of synaptic membrane     | 1/21      | PHB                                                                                                                |
| GO:0005622 | intracellular                                | 21/21     | TFEB KPNB1 STAT5A PHB JUN STAT3 PPP1CA TGFB1 SMAD3 ATF5 IRF3 BCL2L1 MCL1 BCL2 SKP2 NACA GSK3A GSK3B NPM1 PARP1 IL6 |
| GO:0008287 | protein serine/threonine phosphatase complex | 1/21      | PPP1CA                                                                                                             |
| GO:0009986 | cell surface                                 | 2/21      | PHB TGFB1                                                                                                          |
| GO:0012505 | endomembrane system                          | 8/21      | KPNB1 PHB TGFB1 SMAD3 BCL2L1 BCL2 PARP1 IL6                                                                        |

| ID         | Description                       | GeneRatio | geneID                                                                                                             |
|------------|-----------------------------------|-----------|--------------------------------------------------------------------------------------------------------------------|
| GO:0031975 | envelope                          | 8/21      | KPNB1 PHB STAT3 SMAD3 BCL2L1 MCL1 BCL2 PARP1                                                                       |
| GO:0042995 | cell projection                   | 4/21      | PPP1CA TGFB1 GSK3A GSK3B                                                                                           |
| GO:0043209 | myelin sheath                     | 2/21      | PHB BCL2                                                                                                           |
| GO:0044297 | cell body                         | 3/21      | PPP1CA TGFB1 GSK3A                                                                                                 |
| GO:0044424 | intracellular part                | 21/21     | TFEB KPNB1 STAT5A PHB JUN STAT3 PPP1CA TGFB1 SMAD3 ATF5 IRF3 BCL2L1 MCL1 BCL2 SKP2 NACA GSK3A GSK3B NPM1 PARP1 IL6 |
| GO:0044463 | cell projection part              | 3/21      | PPP1CA GSK3A GSK3B                                                                                                 |
| GO:0071944 | cell periphery                    | 7/21      | PHB STAT3 PPP1CA TGFB1 SMAD3 GSK3B IL6                                                                             |
| GO:0097458 | neuron part                       | 7/21      | PHB STAT3 PPP1CA TGFB1 BCL2L1 GSK3A GSK3B                                                                          |
| GO:0044456 | synapse part                      | 6/21      | PHB STAT3 PPP1CA BCL2L1 GSK3A GSK3B                                                                                |
| GO:0098685 | Schaffer collateral - CA1 synapse | 1/21      | STAT3                                                                                                              |
| GO:0098978 | glutamatergic synapse             | 4/21      | PHB STAT3 PPP1CA GSK3B                                                                                             |
| GO:0098982 | GABA-ergic synapse                | 1/21      | PHB                                                                                                                |
| GO:0098984 | neuron to neuron synapse          | 2/21      | PHB STAT3                                                                                                          |

## 2.2.3 BIOLOGICAL PROCESS

| ID         | Description                              | GeneRatio | geneID                                                                                                 |
|------------|------------------------------------------|-----------|--------------------------------------------------------------------------------------------------------|
| GO:0019953 | sexual reproduction                      | 4/21      | STAT3 TGFB1 BCL2L1 BCL2                                                                                |
| GO:0022414 | reproductive process                     | 6/21      | TFEB PHB STAT3 TGFB1 BCL2L1 BCL2                                                                       |
| GO:0032504 | multicellular organism reproduction      | 3/21      | TGFB1 BCL2L1 BCL2                                                                                      |
| GO:0055114 | oxidation-reduction process              | 3/21      | PPP1CA GSK3A GSK3B                                                                                     |
| GO:0006807 | nitrogen compound metabolic process      | 18/21     | TFEB KPNB1 STAT5A PHB JUN STAT3 PPP1CA TGFB1 SMAD3 ATF5 IRF3 BCL2 SKP2 GSK3A GSK3B NPM1 PARP1 IL6      |
| GO:0009056 | catabolic process                        | 13/21     | TFEB KPNB1 PHB STAT3 PPP1CA TGFB1 SMAD3 MCL1 BCL2 SKP2 GSK3A GSK3B NPM1                                |
| GO:0009058 | biosynthetic process                     | 17/21     | TFEB KPNB1 STAT5A PHB JUN STAT3 PPP1CA TGFB1 SMAD3 ATF5 IRF3 BCL2 GSK3A GSK3B NPM1 PARP1 IL6           |
| GO:0009892 | negative regulation of metabolic process | 14/21     | PHB JUN STAT3 TGFB1 SMAD3 ATF5 IRF3 MCL1 BCL2 GSK3A GSK3B NPM1 PARP1 IL6                               |
| GO:0009893 | positive regulation of metabolic process | 15/21     | TFEB PHB JUN STAT3 TGFB1 SMAD3 ATF5 IRF3 BCL2 SKP2 GSK3A GSK3B NPM1 PARP1 IL6                          |
| GO:0019222 | regulation of metabolic process          | 19/21     | TFEB KPNB1 STAT5A PHB JUN STAT3 PPP1CA TGFB1 SMAD3 ATF5 IRF3 MCL1 BCL2 SKP2 GSK3A GSK3B NPM1 PARP1 IL6 |

| ID         | Description                                         | GeneRatio | geneID                                                                                                    |
|------------|-----------------------------------------------------|-----------|-----------------------------------------------------------------------------------------------------------|
| GO:0019748 | secondary metabolic process                         | 1/21      | BCL2                                                                                                      |
| GO:0032259 | methylation                                         | 1/21      | PARP1                                                                                                     |
| GO:0032963 | collagen metabolic process                          | 2/21      | TGFB1 IL6                                                                                                 |
| GO:0042440 | pigment metabolic process                           | 1/21      | BCL2                                                                                                      |
| GO:0044237 | cellular metabolic process                          | 19/21     | TFEB KPNB1 STAT5A PHB JUN STAT3 PPP1CA TGFB1 SMAD3 ATF5<br>IRF3 MCL1 BCL2 SKP2 GSK3A GSK3B NPM1 PARP1 IL6 |
| GO:0044238 | primary metabolic process                           | 18/21     | TFEB KPNB1 STAT5A PHB JUN STAT3 PPP1CA TGFB1 SMAD3 ATF5<br>IRF3 BCL2 SKP2 GSK3A GSK3B NPM1 PARP1 IL6      |
| GO:0044281 | small molecule metabolic process                    | 8/21      | KPNB1 STAT5A STAT3 PPP1CA TGFB1 GSK3A GSK3B PARP1                                                         |
| GO:0071704 | organic substance metabolic process                 | 18/21     | TFEB KPNB1 STAT5A PHB JUN STAT3 PPP1CA TGFB1 SMAD3 ATF5<br>IRF3 BCL2 SKP2 GSK3A GSK3B NPM1 PARP1 IL6      |
| GO:0001776 | leukocyte homeostasis                               | 3/21      | TGFB1 BCL2 IL6                                                                                            |
| GO:0002200 | somatic diversification of immune receptors         | 1/21      | TGFB1                                                                                                     |
| GO:0002252 | immune effector process                             | 8/21      | KPNB1 PHB STAT3 TGFB1 IRF3 BCL2 SKP2 IL6                                                                  |
| GO:0002253 | activation of immune response                       | 3/21      | PHB IRF3 BCL2                                                                                             |
| GO:0002262 | myeloid cell homeostasis                            | 2/21      | STAT3 IL6                                                                                                 |
| GO:0002440 | production of molecular mediator of immune response | 2/21      | TGFB1 IL6                                                                                                 |
| GO:0002507 | tolerance induction                                 | 1/21      | TGFB1                                                                                                     |
| GO:0002520 | immune system development                           | 7/21      | JUN STAT3 TGFB1 SMAD3 BCL2 PARP1 IL6                                                                      |
| GO:0002682 | regulation of immune system process                 | 8/21      | PHB JUN STAT3 TGFB1 SMAD3 IRF3 BCL2 IL6                                                                   |
| GO:0002683 | negative regulation of immune system process        | 1/21      | TGFB1                                                                                                     |
| GO:0002684 | positive regulation of immune system process        | 7/21      | PHB JUN STAT3 TGFB1 IRF3 BCL2 IL6                                                                         |
| GO:0006955 | immune response                                     | 11/21     | TFEB KPNB1 PHB JUN STAT3 TGFB1 SMAD3 IRF3 BCL2 SKP2 IL6                                                   |
| GO:0045058 | T cell selection                                    | 3/21      | STAT3 BCL2 IL6                                                                                            |
| GO:0045321 | leukocyte activation                                | 7/21      | KPNB1 JUN STAT3 TGFB1 SMAD3 BCL2 IL6                                                                      |
| GO:0050900 | leukocyte migration                                 | 2/21      | TGFB1 IL6                                                                                                 |
| GO:0016049 | cell growth                                         | 6/21      | PHB TGFB1 SMAD3 BCL2 GSK3A GSK3B                                                                          |
| GO:0040008 | regulation of growth                                | 9/21      | STAT5A PHB STAT3 TGFB1 SMAD3 BCL2L1 BCL2 GSK3A GSK3B                                                      |
| GO:0045926 | negative regulation of growth                       | 5/21      | PHB TGFB1 SMAD3 BCL2 GSK3A                                                                                |
| GO:0045927 | positive regulation of growth                       | 1/21      | BCL2                                                                                                      |
| GO:0048589 | developmental growth                                | 8/21      | STAT5A STAT3 TGFB1 SMAD3 ATF5 BCL2 GSK3A GSK3B                                                            |

| ID         | Description                                   | GeneRatio | geneID                                                                                              |
|------------|-----------------------------------------------|-----------|-----------------------------------------------------------------------------------------------------|
| GO:0002209 | behavioral defense response                   | 1/21      | BCL2                                                                                                |
| GO:0007611 | learning or memory                            | 1/21      | JUN                                                                                                 |
| GO:0007631 | feeding behavior                              | 1/21      | STAT3                                                                                               |
| GO:0050795 | regulation of behavior                        | 1/21      | STAT3                                                                                               |
| GO:0008284 | positive regulation of cell proliferation     | 9/21      | STAT5A JUN STAT3 TGFB1 BCL2L1 BCL2 SKP2 NPM1 IL6                                                    |
| GO:0008285 | negative regulation of cell proliferation     | 9/21      | PHB JUN STAT3 TGFB1 SMAD3 ATF5 BCL2 NPM1 IL6                                                        |
| GO:0014009 | glial cell proliferation                      | 1/21      | IL6                                                                                                 |
| GO:0033002 | muscle cell proliferation                     | 4/21      | JUN STAT3 SKP2 IL6                                                                                  |
| GO:0033687 | osteoblast proliferation                      | 2/21      | SMAD3 BCL2                                                                                          |
| GO:0042127 | regulation of cell proliferation              | 12/21     | STAT5A PHB JUN STAT3 TGFB1 SMAD3 ATF5 BCL2L1 BCL2 SKP2 NPM1 IL6                                     |
| GO:0048144 | fibroblast proliferation                      | 2/21      | JUN TGFB1                                                                                           |
| GO:0050673 | epithelial cell proliferation                 | 5/21      | STAT5A JUN STAT3 TGFB1 SMAD3                                                                        |
| GO:0061351 | neural precursor cell proliferation           | 2/21      | TGFB1 ATF5                                                                                          |
| GO:0070661 | leukocyte proliferation                       | 3/21      | TGFB1 BCL2 IL6                                                                                      |
| GO:0072089 | stem cell proliferation                       | 1/21      | TGFB1                                                                                               |
| GO:0007059 | chromosome segregation                        | 1/21      | KPNB1                                                                                               |
| GO:0007017 | microtubule-based process                     | 4/21      | KPNB1 ATF5 GSK3B NPM1                                                                               |
| GO:0000075 | cell cycle checkpoint                         | 2/21      | TGFB1 BCL2L1                                                                                        |
| GO:0001775 | cell activation                               | 7/21      | KPNB1 JUN STAT3 TGFB1 SMAD3 BCL2 IL6                                                                |
| GO:0007165 | signal transduction                           | 18/21     | KPNB1 STAT5A PHB JUN STAT3 PPP1CA TGFB1 SMAD3 IRF3 BCL2L1 MCL1 BCL2 SKP2 GSK3A GSK3B NPM1 PARP1 IL6 |
| GO:0006928 | movement of cell or subcellular component     | 8/21      | KPNB1 STAT5A JUN STAT3 TGFB1 SMAD3 BCL2 IL6                                                         |
| GO:0007049 | cell cycle                                    | 11/21     | KPNB1 JUN STAT3 PPP1CA TGFB1 SMAD3 ATF5 BCL2L1 BCL2 SKP2 NPM1                                       |
| GO:0007154 | cell communication                            | 18/21     | KPNB1 STAT5A PHB JUN STAT3 PPP1CA TGFB1 SMAD3 IRF3 BCL2L1 MCL1 BCL2 SKP2 GSK3A GSK3B NPM1 PARP1 IL6 |
| GO:0007163 | establishment or maintenance of cell polarity | 1/21      | GSK3B                                                                                               |
| GO:0007272 | ensheathment of neurons                       | 1/21      | TGFB1                                                                                               |
| GO:0008219 | cell death                                    | 18/21     | KPNB1 PHB JUN STAT3 PPP1CA TGFB1 SMAD3 ATF5 IRF3 BCL2L1 MCL1 BCL2 SKP2 GSK3A GSK3B NPM1 PARP1 IL6   |
| GO:0016043 | cellular component organization               | 16/21     | TFEB KPNB1 PHB JUN STAT3 PPP1CA TGFB1 SMAD3 ATF5 BCL2L1 BCL2 GSK3A GSK3B NPM1 PARP1 IL6             |
| GO:0016458 | gene silencing                                | 3/21      | STAT3 TGFB1 SMAD3                                                                                   |

| ID         | Description                                                         | GeneRatio | geneID                                                                                                        |
|------------|---------------------------------------------------------------------|-----------|---------------------------------------------------------------------------------------------------------------|
| GO:0019725 | cellular homeostasis                                                | 4/21      | TGFB1 SMAD3 MCL1 BCL2                                                                                         |
| GO:0022402 | cell cycle process                                                  | 8/21      | KPNB1 TGFB1 SMAD3 ATF5 BCL2L1 BCL2 SKP2 NPM1                                                                  |
| GO:0022412 | cellular process involved in reproduction in multicellular organism | 3/21      | TGFB1 BCL2L1 BCL2                                                                                             |
| GO:0030029 | actin filament-based process                                        | 3/21      | TGFB1 SMAD3 BCL2                                                                                              |
| GO:0032940 | secretion by cell                                                   | 5/21      | KPNB1 TGFB1 IRF3 GSK3B IL6                                                                                    |
| GO:0033059 | cellular pigmentation                                               | 1/21      | BCL2                                                                                                          |
| GO:0044764 | multi-organism cellular process                                     | 1/21      | IRF3                                                                                                          |
| GO:0048522 | positive regulation of cellular process                             | 19/21     | TFEB STAT5A PHB JUN STAT3 PPP1CA TGFB1 SMAD3 ATF5 IRF3 BCL2L1 MCL1 BCL2 SKP2 GSK3A GSK3B NPM1 PARP1 IL6       |
| GO:0048523 | negative regulation of cellular process                             | 15/21     | PHB JUN STAT3 TGFB1 SMAD3 ATF5 IRF3 BCL2L1 MCL1 BCL2 GSK3A GSK3B NPM1 PARP1 IL6                               |
| GO:0048869 | cellular developmental process                                      | 14/21     | PHB JUN STAT3 TGFB1 SMAD3 ATF5 BCL2L1 MCL1 BCL2 GSK3A GSK3B NPM1 PARP1 IL6                                    |
| GO:0050794 | regulation of cellular process                                      | 20/21     | TFEB KPNB1 STAT5A PHB JUN STAT3 PPP1CA TGFB1 SMAD3 ATF5 IRF3 BCL2L1 MCL1 BCL2 SKP2 GSK3A GSK3B NPM1 PARP1 IL6 |
| GO:0051301 | cell division                                                       | 3/21      | PPP1CA TGFB1 BCL2L1                                                                                           |
| GO:0051716 | cellular response to stimulus                                       | 18/21     | KPNB1 STAT5A PHB JUN STAT3 PPP1CA TGFB1 SMAD3 IRF3 BCL2L1 MCL1 BCL2 SKP2 GSK3A GSK3B NPM1 PARP1 IL6           |
| GO:0061919 | process utilizing autophagic mechanism                              | 4/21      | TFEB MCL1 BCL2 GSK3A                                                                                          |
| GO:0097194 | execution phase of apoptosis                                        | 2/21      | KPNB1 BCL2L1                                                                                                  |
| GO:0006808 | regulation of nitrogen utilization                                  | 1/21      | BCL2                                                                                                          |
| GO:0003006 | developmental process involved in reproduction                      | 5/21      | TFEB PHB TGFB1 BCL2L1 BCL2                                                                                    |
| GO:0009566 | fertilization                                                       | 1/21      | BCL2L1                                                                                                        |
| GO:0044703 | multi-organism reproductive process                                 | 4/21      | STAT3 TGFB1 BCL2L1 BCL2                                                                                       |
| GO:0048609 | multicellular organismal reproductive process                       | 3/21      | TGFB1 BCL2L1 BCL2                                                                                             |
| GO:0007155 | cell adhesion                                                       | 6/21      | PPP1CA TGFB1 SMAD3 BCL2 GSK3B IL6                                                                             |
| GO:0007267 | cell-cell signaling                                                 | 6/21      | STAT3 PPP1CA SMAD3 GSK3A GSK3B IL6                                                                            |
| GO:0023051 | regulation of signaling                                             | 15/21     | PHB JUN STAT3 PPP1CA TGFB1 SMAD3 IRF3 BCL2L1 MCL1 BCL2 SKP2 GSK3A GSK3B PARP1 IL6                             |
| GO:0023056 | positive regulation of signaling                                    | 15/21     | PHB JUN STAT3 PPP1CA TGFB1 SMAD3 IRF3 BCL2L1 MCL1 BCL2 SKP2 GSK3A GSK3B PARP1 IL6                             |
| GO:0023057 | negative regulation of signaling                                    | 9/21      | PHB TGFB1 SMAD3 BCL2L1 MCL1 BCL2 GSK3A GSK3B IL6                                                              |
| GO:0001503 | ossification                                                        | 5/21      | PHB TGFB1 SMAD3 BCL2 IL6                                                                                      |
| GO:0001763 | morphogenesis of a branching structure                              | 3/21      | PPP1CA TGFB1 BCL2                                                                                             |



| ID         | Description                                              | GeneRatio | geneID                                                                                      |
|------------|----------------------------------------------------------|-----------|---------------------------------------------------------------------------------------------|
| GO:0001816 | cytokine production                                      | 4/21      | TGFB1 SMAD3 IRF3 IL6                                                                        |
| GO:0003008 | system process                                           | 7/21      | JUN TGFB1 SMAD3 BCL2 GSK3A GSK3B PARP1                                                      |
| GO:0007275 | multicellular organism development                       | 16/21     | TFEB STAT5A PHB JUN STAT3 PPP1CA TGFB1 SMAD3 ATF5 BCL2L1<br>MCL1 BCL2 GSK3A GSK3B PARP1 IL6 |
| GO:0007389 | pattern specification process                            | 1/21      | SMAD3                                                                                       |
| GO:0009791 | post-embryonic development                               | 2/21      | ATF5 BCL2                                                                                   |
| GO:0019827 | stem cell population maintenance                         | 1/21      | STAT3                                                                                       |
| GO:0022404 | molting cycle process                                    | 1/21      | BCL2                                                                                        |
| GO:0032922 | circadian regulation of gene expression                  | 1/21      | PPP1CA                                                                                      |
| GO:0033555 | multicellular organismal response to stress              | 1/21      | BCL2                                                                                        |
| GO:0035264 | multicellular organism growth                            | 4/21      | STAT5A STAT3 ATF5 BCL2                                                                      |
| GO:0035265 | organ growth                                             | 2/21      | BCL2 GSK3A                                                                                  |
| GO:0042303 | molting cycle                                            | 1/21      | BCL2                                                                                        |
| GO:0044706 | multi-multicellular organism process                     | 2/21      | TGFB1 BCL2                                                                                  |
| GO:0048771 | tissue remodeling                                        | 2/21      | TGFB1 IL6                                                                                   |
| GO:0048871 | multicellular organismal homeostasis                     | 3/21      | STAT3 BCL2 IL6                                                                              |
| GO:0050817 | coagulation                                              | 1/21      | IL6                                                                                         |
| GO:0051239 | regulation of multicellular organismal process           | 11/21     | STAT5A JUN STAT3 TGFB1 SMAD3 IRF3 BCL2 GSK3A GSK3B PARP1<br>IL6                             |
| GO:0051240 | positive regulation of multicellular organismal process  | 10/21     | STAT5A JUN STAT3 TGFB1 SMAD3 IRF3 BCL2 GSK3A PARP1 IL6                                      |
| GO:0051241 | negative regulation of multicellular organismal process  | 8/21      | STAT3 TGFB1 SMAD3 IRF3 BCL2 GSK3A GSK3B IL6                                                 |
| GO:0090130 | tissue migration                                         | 3/21      | STAT5A JUN TGFB1                                                                            |
| GO:0009653 | anatomical structure morphogenesis                       | 10/21     | JUN STAT3 PPP1CA TGFB1 SMAD3 BCL2L1 BCL2 GSK3A GSK3B IL6                                    |
| GO:0007568 | aging                                                    | 5/21      | JUN STAT3 TGFB1 BCL2 NPM1                                                                   |
| GO:0048646 | anatomical structure formation involved in morphogenesis | 5/21      | JUN STAT3 TGFB1 SMAD3 IL6                                                                   |
| GO:0021700 | developmental maturation                                 | 1/21      | BCL2                                                                                        |
| GO:0048856 | anatomical structure development                         | 16/21     | TFEB STAT5A PHB JUN STAT3 PPP1CA TGFB1 SMAD3 ATF5 BCL2L1<br>MCL1 BCL2 GSK3A GSK3B PARP1 IL6 |
| GO:0050793 | regulation of developmental process                      | 10/21     | STAT5A JUN STAT3 TGFB1 SMAD3 BCL2 GSK3A GSK3B PARP1 IL6                                     |
| GO:0051093 | negative regulation of developmental process             | 7/21      | STAT3 TGFB1 SMAD3 BCL2 GSK3A GSK3B IL6                                                      |
| GO:0051094 | positive regulation of developmental process             | 7/21      | JUN STAT3 TGFB1 SMAD3 BCL2 PARP1 IL6                                                        |

| ID         | Description                                                      | GeneRatio | geneID                                                                            |
|------------|------------------------------------------------------------------|-----------|-----------------------------------------------------------------------------------|
| GO:0098727 | maintenance of cell number                                       | 1/21      | STAT3                                                                             |
| GO:0040012 | regulation of locomotion                                         | 7/21      | STAT5A JUN STAT3 TGFB1 SMAD3 BCL2 IL6                                             |
| GO:0040013 | negative regulation of locomotion                                | 3/21      | STAT3 TGFB1 BCL2                                                                  |
| GO:0040017 | positive regulation of locomotion                                | 7/21      | STAT5A JUN STAT3 TGFB1 SMAD3 BCL2 IL6                                             |
| GO:0042330 | taxis                                                            | 3/21      | TGFB1 SMAD3 IL6                                                                   |
| GO:0048870 | cell motility                                                    | 7/21      | STAT5A JUN STAT3 TGFB1 SMAD3 BCL2 IL6                                             |
| GO:0048066 | developmental pigmentation                                       | 1/21      | BCL2                                                                              |
| GO:0007623 | circadian rhythm                                                 | 4/21      | JUN PPP1CA ATF5 GSK3B                                                             |
| GO:0043902 | positive regulation of multi-organism process                    | 1/21      | JUN                                                                               |
| GO:0044089 | positive regulation of cellular component biogenesis             | 5/21      | JUN TGFB1 SMAD3 GSK3B PARP1                                                       |
| GO:0045785 | positive regulation of cell adhesion                             | 4/21      | TGFB1 SMAD3 GSK3B IL6                                                             |
| GO:0048087 | positive regulation of developmental pigmentation                | 1/21      | BCL2                                                                              |
| GO:0048584 | positive regulation of response to stimulus                      | 15/21     | PHB JUN STAT3 PPP1CA TGFB1 SMAD3 IRF3 BCL2L1 MCL1 BCL2 SKP2 GSK3A GSK3B PARP1 IL6 |
| GO:0051050 | positive regulation of transport                                 | 7/21      | TGFB1 SMAD3 IRF3 BCL2 GSK3A GSK3B IL6                                             |
| GO:0051091 | positive regulation of DNA-binding transcription factor activity | 4/21      | TGFB1 SMAD3 NPM1 IL6                                                              |
| GO:1903829 | positive regulation of cellular protein localization             | 6/21      | TGFB1 SMAD3 BCL2 GSK3A GSK3B PARP1                                                |
| GO:1904181 | positive regulation of membrane depolarization                   | 1/21      | PARP1                                                                             |
| GO:1904951 | positive regulation of establishment of protein localization     | 7/21      | TGFB1 SMAD3 IRF3 BCL2 GSK3A GSK3B IL6                                             |
| GO:0043901 | negative regulation of multi-organism process                    | 1/21      | JUN                                                                               |
| GO:0048585 | negative regulation of response to stimulus                      | 9/21      | PHB TGFB1 SMAD3 BCL2L1 MCL1 BCL2 GSK3A GSK3B IL6                                  |
| GO:0051051 | negative regulation of transport                                 | 3/21      | TGFB1 BCL2 GSK3A                                                                  |
| GO:1903828 | negative regulation of cellular protein localization             | 3/21      | TGFB1 BCL2L1 GSK3B                                                                |
| GO:1904180 | negative regulation of membrane depolarization                   | 1/21      | BCL2                                                                              |
| GO:1905953 | negative regulation of lipid localization                        | 1/21      | IL6                                                                               |
| GO:0030155 | regulation of cell adhesion                                      | 5/21      | TGFB1 SMAD3 BCL2 GSK3B IL6                                                        |
| GO:0032879 | regulation of localization                                       | 12/21     | STAT5A JUN STAT3 TGFB1 SMAD3 IRF3 BCL2L1 BCL2 GSK3A GSK3B PARP1 IL6               |
| GO:0042752 | regulation of circadian rhythm                                   | 1/21      | PPP1CA                                                                            |

| ID         | Description                                 | GeneRatio | geneID                                                                                                        |
|------------|---------------------------------------------|-----------|---------------------------------------------------------------------------------------------------------------|
| GO:0043900 | regulation of multi-organism process        | 2/21      | JUN BCL2                                                                                                      |
| GO:0044087 | regulation of cellular component biogenesis | 6/21      | JUN TGFB1 SMAD3 GSK3B NPM1 PARP1                                                                              |
| GO:0048070 | regulation of developmental pigmentation    | 1/21      | BCL2                                                                                                          |
| GO:0048518 | positive regulation of biological process   | 19/21     | TFEB STAT5A PHB JUN STAT3 PPP1CA TGFB1 SMAD3 ATF5 IRF3 BCL2L1 MCL1 BCL2 SKP2 GSK3A GSK3B NPM1 PARP1 IL6       |
| GO:0048519 | negative regulation of biological process   | 15/21     | PHB JUN STAT3 TGFB1 SMAD3 ATF5 IRF3 BCL2L1 MCL1 BCL2 GSK3A GSK3B NPM1 PARP1 IL6                               |
| GO:0048583 | regulation of response to stimulus          | 16/21     | PHB JUN STAT3 PPP1CA TGFB1 SMAD3 IRF3 BCL2L1 MCL1 BCL2 SKP2 GSK3A GSK3B NPM1 PARP1 IL6                        |
| GO:0006950 | response to stress                          | 16/21     | PHB JUN STAT3 PPP1CA TGFB1 SMAD3 IRF3 BCL2L1 MCL1 BCL2 SKP2 GSK3A GSK3B NPM1 PARP1 IL6                        |
| GO:0009605 | response to external stimulus               | 10/21     | PHB JUN PPP1CA TGFB1 SMAD3 IRF3 BCL2L1 BCL2 SKP2 IL6                                                          |
| GO:0009607 | response to biotic stimulus                 | 9/21      | JUN TGFB1 SMAD3 IRF3 BCL2L1 BCL2 SKP2 GSK3B IL6                                                               |
| GO:0009628 | response to abiotic stimulus                | 9/21      | JUN PPP1CA TGFB1 SMAD3 BCL2L1 BCL2 GSK3B NPM1 PARP1                                                           |
| GO:0009719 | response to endogenous stimulus             | 13/21     | STAT5A PHB JUN STAT3 TGFB1 SMAD3 BCL2L1 BCL2 SKP2 GSK3A GSK3B PARP1 IL6                                       |
| GO:0042221 | response to chemical                        | 17/21     | STAT5A PHB JUN STAT3 PPP1CA TGFB1 SMAD3 IRF3 BCL2L1 MCL1 BCL2 SKP2 GSK3A GSK3B NPM1 PARP1 IL6                 |
| GO:0043500 | muscle adaptation                           | 3/21      | SMAD3 GSK3A PARP1                                                                                             |
| GO:0051606 | detection of stimulus                       | 1/21      | PARP1                                                                                                         |
| GO:0072376 | protein activation cascade                  | 1/21      | PHB                                                                                                           |
| GO:0031503 | protein-containing complex localization     | 1/21      | NPM1                                                                                                          |
| GO:0033036 | macromolecule localization                  | 13/21     | KPNB1 STAT3 TGFB1 SMAD3 IRF3 BCL2L1 MCL1 BCL2 GSK3A GSK3B NPM1 PARP1 IL6                                      |
| GO:0051234 | establishment of localization               | 14/21     | KPNB1 STAT5A PHB STAT3 TGFB1 SMAD3 IRF3 BCL2L1 MCL1 BCL2 GSK3A GSK3B NPM1 IL6                                 |
| GO:0051235 | maintenance of location                     | 2/21      | TGFB1 IL6                                                                                                     |
| GO:0051641 | cellular localization                       | 10/21     | KPNB1 STAT3 TGFB1 SMAD3 BCL2L1 BCL2 GSK3A GSK3B NPM1 PARP1                                                    |
| GO:0051674 | localization of cell                        | 7/21      | STAT5A JUN STAT3 TGFB1 SMAD3 BCL2 IL6                                                                         |
| GO:1902579 | multi-organism localization                 | 1/21      | KPNB1                                                                                                         |
| GO:0051707 | response to other organism                  | 8/21      | JUN TGFB1 SMAD3 IRF3 BCL2L1 BCL2 SKP2 IL6                                                                     |
| GO:0044419 | interspecies interaction between organisms  | 9/21      | KPNB1 JUN STAT3 TGFB1 SMAD3 IRF3 BCL2L1 BCL2 NPM1                                                             |
| GO:0050789 | regulation of biological process            | 20/21     | TFEB KPNB1 STAT5A PHB JUN STAT3 PPP1CA TGFB1 SMAD3 ATF5 IRF3 BCL2L1 MCL1 BCL2 SKP2 GSK3A GSK3B NPM1 PARP1 IL6 |
| GO:0065008 | regulation of biological quality            | 15/21     | STAT5A PHB JUN STAT3 PPP1CA TGFB1 SMAD3 BCL2L1 MCL1 BCL2 GSK3A GSK3B NPM1 PARP1 IL6                           |

| ID         | Description                      | GeneRatio | geneID                                                          |
|------------|----------------------------------|-----------|-----------------------------------------------------------------|
| GO:0065009 | regulation of molecular function | 11/21     | JUN STAT3 PPP1CA TGFB1 SMAD3 BCL2 GSK3A GSK3B NPM1 PARP1<br>IL6 |
| GO:0044085 | cellular component biogenesis    | 8/21      | KPNB1 JUN TGFB1 SMAD3 BCL2 GSK3B NPM1 PARP1                     |

# **GO ENRICHMENT:**

# 1 HCOV-HOST\_SET

## 1.1 GO ENRICHMENT

GO Enrichment Analysis after FDR control of a gene set.

### MOLECULAR FUNCTION

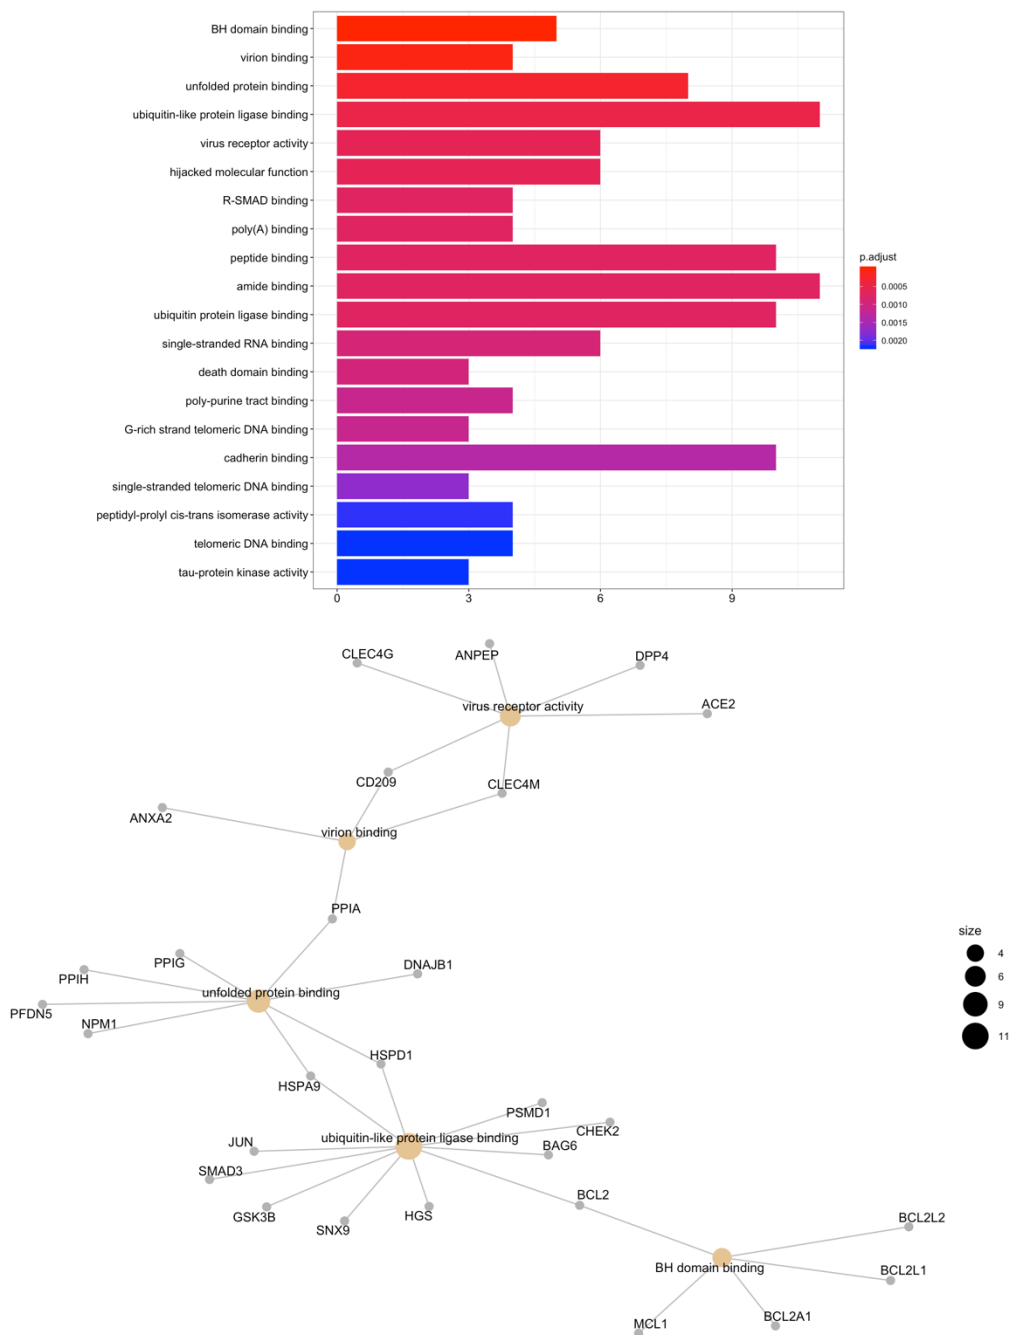

# CELLULAR COMPONENT

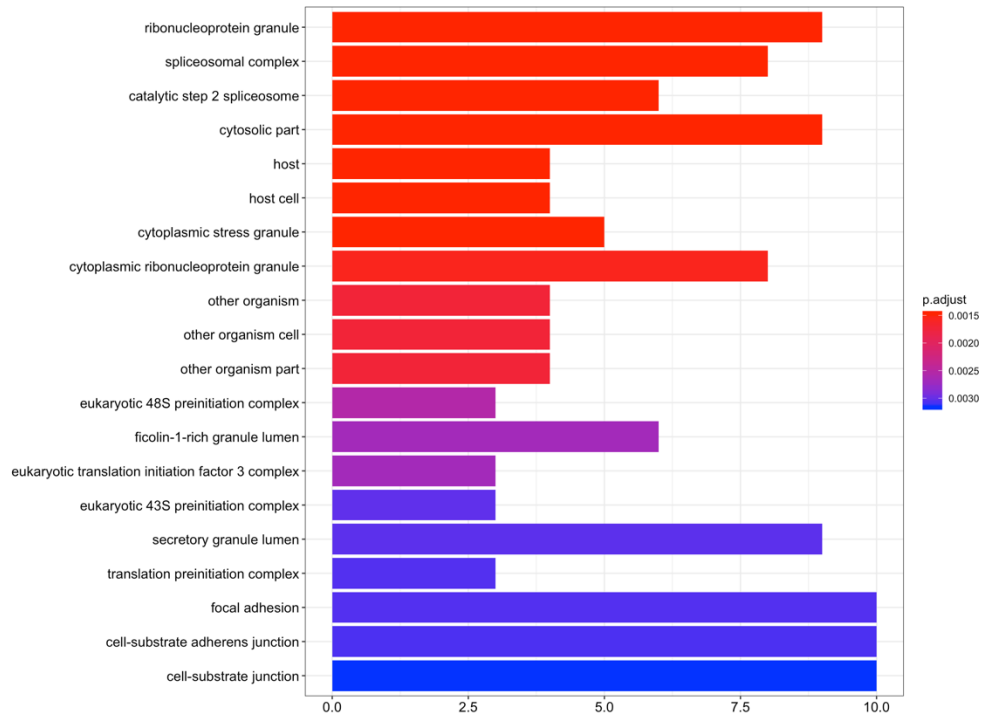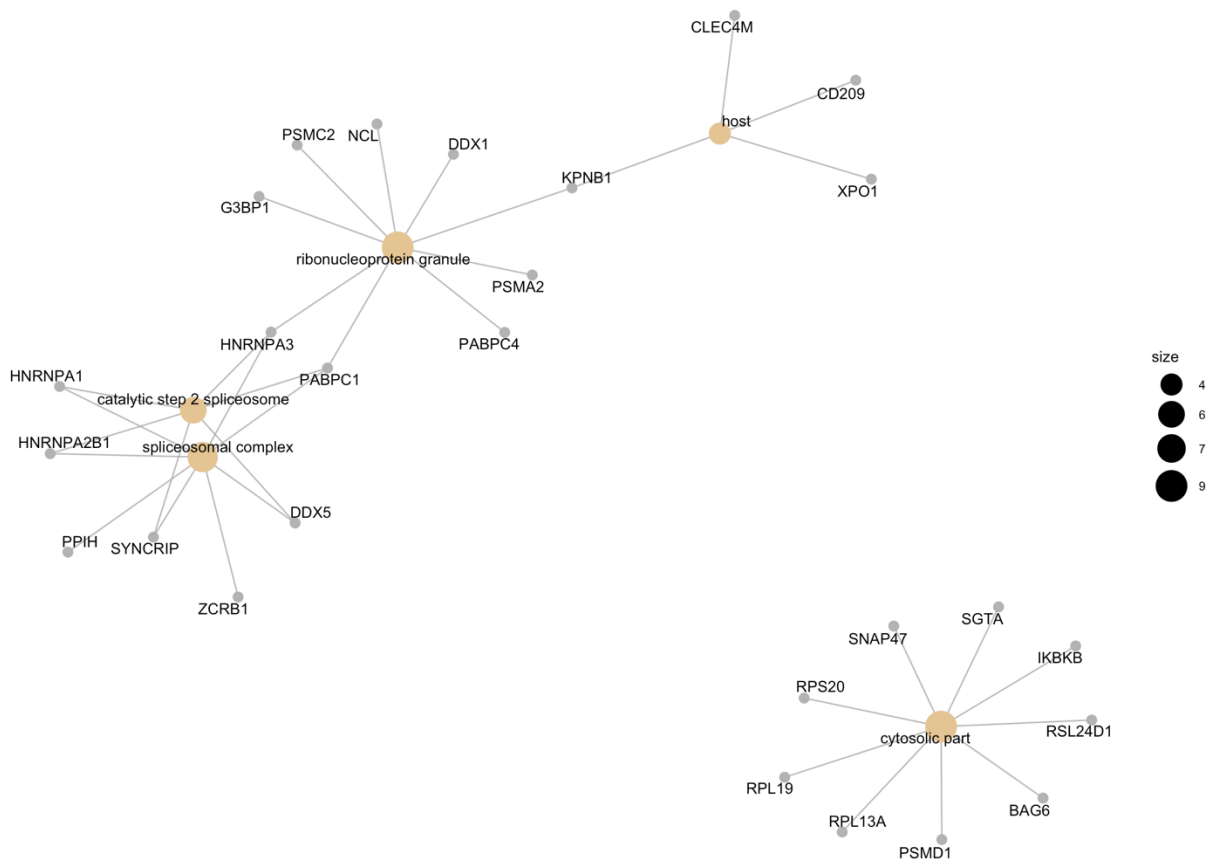





## 1.2 TABLES ENRICHMENT

### 1.2.1 MOLECULAR FUNCTION

| ID         | Description                                   | GeneRatio | BgRatio   | p.adjust | geneID                                                          |
|------------|-----------------------------------------------|-----------|-----------|----------|-----------------------------------------------------------------|
| GO:0051400 | BH domain binding                             | 5/117     | 10/17632  | 0        | BCL2L1 BCL2L2 MCL1 BCL2A1 BCL2                                  |
| GO:0046790 | virion binding                                | 4/117     | 10/17632  | 0        | CD209 CLEC4M PPIA ANXA2                                         |
| GO:0051082 | unfolded protein binding                      | 8/117     | 127/17632 | 0        | PPIA DNAJB1 HSPD1 HSPA9 NPM1 PPIG PPIH PFDN5                    |
| GO:0044389 | ubiquitin-like protein ligase binding         | 11/117    | 301/17632 | 0        | JUN SMAD3 BCL2 HSPD1 HSPA9 PSMD1 SNX9 GSK3B HGS BAG6 CHEK2      |
| GO:0001618 | virus receptor activity                       | 6/117     | 74/17632  | 0.001    | ACE2 CLEC4G CD209 CLEC4M ANPEP DPP4                             |
| GO:0104005 | hijacked molecular function                   | 6/117     | 74/17632  | 0.001    | ACE2 CLEC4G CD209 CLEC4M ANPEP DPP4                             |
| GO:0070412 | R-SMAD binding                                | 4/117     | 23/17632  | 0.001    | JUN SMAD3 PARP1 DDX5                                            |
| GO:0008143 | poly(A) binding                               | 4/117     | 24/17632  | 0.001    | SYNCRIP PABPC1 PABPC4 DDX1                                      |
| GO:0042277 | peptide binding                               | 10/117    | 285/17632 | 0.001    | KPNB1 CD209 CLEC4M KPNA2 PPIA ANPEP HSPD1 SRP54 PPIG PPIH       |
| GO:0033218 | amide binding                                 | 11/117    | 348/17632 | 0.001    | KPNB1 ACBD5 CD209 CLEC4M KPNA2 PPIA ANPEP HSPD1 SRP54 PPIG PPIH |
| GO:0031625 | ubiquitin protein ligase binding              | 10/117    | 286/17632 | 0.001    | JUN SMAD3 BCL2 HSPD1 HSPA9 PSMD1 SNX9 GSK3B BAG6 CHEK2          |
| GO:0003727 | single-stranded RNA binding                   | 6/117     | 90/17632  | 0.001    | HNRNPA1 SYNCRIP PTBP1 PABPC1 PABPC4 DDX1                        |
| GO:0070513 | death domain binding                          | 3/117     | 10/17632  | 0.001    | BCL2L1 MCL1 BCL2                                                |
| GO:0070717 | poly-purine tract binding                     | 4/117     | 30/17632  | 0.001    | SYNCRIP PABPC1 PABPC4 DDX1                                      |
| GO:0098505 | G-rich strand telomeric DNA binding           | 3/117     | 11/17632  | 0.001    | HNRNPA1 HNRNPA2B1 TERF1                                         |
| GO:0045296 | cadherin binding                              | 10/117    | 323/17632 | 0.001    | TWF2 YKT6 STX5 PPP1CA ANXA2 DNAJB1 EIF3E CHMP4B SNX9 CHMP2B     |
| GO:0043047 | single-stranded telomeric DNA binding         | 3/117     | 13/17632  | 0.002    | HNRNPA1 HNRNPA2B1 TERF1                                         |
| GO:0003755 | peptidyl-prolyl cis-trans isomerase activity  | 4/117     | 37/17632  | 0.002    | PPIA FKBP1A PPIG PPIH                                           |
| GO:0042162 | telomeric DNA binding                         | 4/117     | 38/17632  | 0.002    | HNRNPA1 HNRNPA2B1 NCL TERF1                                     |
| GO:0050321 | tau-protein kinase activity                   | 3/117     | 15/17632  | 0.002    | GSK3A GSK3B MARK3                                               |
| GO:0098847 | sequence-specific single stranded DNA binding | 3/117     | 15/17632  | 0.002    | HNRNPA1 HNRNPA2B1 TERF1                                         |

| ID         | Description                        | GeneRatio | BgRatio   | p.adjust | geneID                                                          |
|------------|------------------------------------|-----------|-----------|----------|-----------------------------------------------------------------|
| GO:0016859 | cis-trans isomerase activity       | 4/117     | 41/17632  | 0.003    | PPIA FKBP1A PPIG PPIH                                           |
| GO:0002020 | protease binding                   | 6/117     | 125/17632 | 0.003    | BCL2 DPP4 ANXA2 HSPD1 GSK3B BAG6                                |
| GO:0046332 | SMAD binding                       | 5/117     | 80/17632  | 0.003    | JUN SMAD3 PARP1 FKBP1A DDX5                                     |
| GO:0043021 | ribonucleoprotein complex binding  | 6/117     | 128/17632 | 0.003    | PPP1CA SRP54 NPM1 PPIH BAG6 DDX5                                |
| GO:0016018 | cyclosporin A binding              | 3/117     | 19/17632  | 0.004    | PPIA PPIG PPIH                                                  |
| GO:0140142 | nucleocytoplasmic carrier activity | 3/117     | 19/17632  | 0.004    | XPO1 KPNA2 KPNA4                                                |
| GO:0008565 | protein transporter activity       | 5/117     | 88/17632  | 0.004    | KPNB1 XPO1 KPNA2 MCL1 KPNA4                                     |
| GO:0050839 | cell adhesion molecule binding     | 11/117    | 486/17632 | 0.005    | TWF2 YKT6 STX5 PPP1CA CD9 ANXA2 DNAJB1 EIF3E CHMP4B SNX9 CHMP2B |
| GO:0047485 | protein N-terminus binding         | 5/117     | 107/17632 | 0.009    | SCFD1 STX5 TGFB1 EIF3E PARP1                                    |
| GO:0036002 | pre-mRNA binding                   | 4/117     | 62/17632  | 0.009    | HNRNPA1 PTBP1 HNRNPA2B1 DDX5                                    |

## 1.2.2 CELLULAR COMPONENT

| ID         | Description                           | GeneRatio | BgRatio   | p.adjust | geneID                                                   |
|------------|---------------------------------------|-----------|-----------|----------|----------------------------------------------------------|
| GO:0035770 | ribonucleoprotein granule             | 9/119     | 219/19659 | 0.001    | PSMC2 KPNB1 HNRNPA3 PABPC1 PABPC4 G3BP1 NCL DDX1 PSMA2   |
| GO:0005681 | spliceosomal complex                  | 8/119     | 179/19659 | 0.001    | HNRNPA1 ZCRB1 SYNCRIP HNRNPA2B1 HNRNPA3 PABPC1 PPIH DDX5 |
| GO:0071013 | catalytic step 2 spliceosome          | 6/119     | 87/19659  | 0.001    | HNRNPA1 SYNCRIP HNRNPA2B1 HNRNPA3 PABPC1 DDX5            |
| GO:0044445 | cytosolic part                        | 9/119     | 250/19659 | 0.001    | RSL24D1 IKKBK RPL13A PSMD1 RPL19 BAG6 SNAP47 RPS20 SGTA  |
| GO:0018995 | host                                  | 4/119     | 29/19659  | 0.001    | KPNB1 XPO1 CD209 CLEC4M                                  |
| GO:0043657 | host cell                             | 4/119     | 29/19659  | 0.001    | KPNB1 XPO1 CD209 CLEC4M                                  |
| GO:0010494 | cytoplasmic stress granule            | 5/119     | 60/19659  | 0.001    | KPNB1 PABPC1 PABPC4 G3BP1 DDX1                           |
| GO:0036464 | cytoplasmic ribonucleoprotein granule | 8/119     | 207/19659 | 0.002    | PSMC2 KPNB1 PABPC1 PABPC4 G3BP1 NCL DDX1 PSMA2           |
| GO:0044215 | other organism                        | 4/119     | 35/19659  | 0.002    | KPNB1 XPO1 CD209 CLEC4M                                  |
| GO:0044216 | other organism cell                   | 4/119     | 35/19659  | 0.002    | KPNB1 XPO1 CD209 CLEC4M                                  |
| GO:0044217 | other organism part                   | 4/119     | 35/19659  | 0.002    | KPNB1 XPO1 CD209 CLEC4M                                  |
| GO:0033290 | eukaryotic 48S preinitiation complex  | 3/119     | 15/19659  | 0.003    | EIF3E EIF3I EIF3F                                        |

| ID         | Description                                        | GeneRatio | BgRatio   | p.adjust | geneID                                                    |
|------------|----------------------------------------------------|-----------|-----------|----------|-----------------------------------------------------------|
| GO:1904813 | ficolin-1-rich granule lumen                       | 6/119     | 124/19659 | 0.003    | PSMC2 KPNB1 FGL2 PPIA PSMA2 EEF1A1                        |
| GO:0005852 | eukaryotic translation initiation factor 3 complex | 3/119     | 16/19659  | 0.003    | EIF3E EIF3I EIF3F                                         |
| GO:0016282 | eukaryotic 43S preinitiation complex               | 3/119     | 17/19659  | 0.003    | EIF3E EIF3I EIF3F                                         |
| GO:0034774 | secretory granule lumen                            | 9/119     | 321/19659 | 0.003    | PSMC2 KPNB1 TGFB1 PPIA ANXA2 PSMD1 SERPING1 PSMA2 EEF1A1  |
| GO:0070993 | translation preinitiation complex                  | 3/119     | 18/19659  | 0.003    | EIF3E EIF3I EIF3F                                         |
| GO:0005925 | focal adhesion                                     | 10/119    | 402/19659 | 0.003    | PPIA CD9 DPP4 HSPA9 RPL13A PABPC1 NPM1 G3BP1 RPL19 CAV1   |
| GO:0005924 | cell-substrate adherens junction                   | 10/119    | 405/19659 | 0.003    | PPIA CD9 DPP4 HSPA9 RPL13A PABPC1 NPM1 G3BP1 RPL19 CAV1   |
| GO:0030055 | cell-substrate junction                            | 10/119    | 409/19659 | 0.003    | PPIA CD9 DPP4 HSPA9 RPL13A PABPC1 NPM1 G3BP1 RPL19 CAV1   |
| GO:0060205 | cytoplasmic vesicle lumen                          | 9/119     | 338/19659 | 0.003    | PSMC2 KPNB1 TGFB1 PPIA ANXA2 PSMD1 SERPING1 PSMA2 EEF1A1  |
| GO:0031983 | vesicle lumen                                      | 9/119     | 339/19659 | 0.003    | PSMC2 KPNB1 TGFB1 PPIA ANXA2 PSMD1 SERPING1 PSMA2 EEF1A1  |
| GO:0098978 | glutamatergic synapse                              | 9/119     | 350/19659 | 0.004    | PHB STAT3 PPP1CA KPNA2 DNAJB1 GSK3B CHMP2B SNAP47 ABHD17A |
| GO:0000781 | chromosome, telomeric region                       | 6/119     | 158/19659 | 0.006    | PPP1CA HNRNPA2B1 PARP1 H2AFY2 CHEK2 TERF1                 |
| GO:0043209 | myelin sheath                                      | 6/119     | 162/19659 | 0.006    | PHB BCL2 ANXA2 ACO2 HSPD1 NDUFA10                         |
| GO:0036452 | ESCRT complex                                      | 3/119     | 27/19659  | 0.007    | CHMP4B HGS CHMP2B                                         |
| GO:0005741 | mitochondrial outer membrane                       | 6/119     | 180/19659 | 0.01     | PHB BCL2L1 BCL2L2 MCL1 BCL2A1 BCL2                        |

## 1.2.3 BIOLOGICAL PROCESS

| ID         | Description           | GeneRatio | BgRatio   | p.adjust | geneID                                                                                                     |
|------------|-----------------------|-----------|-----------|----------|------------------------------------------------------------------------------------------------------------|
| GO:0051701 | interaction with host | 17/117    | 209/18493 | 0        | KPNB1 TGFB1 SMAD3 ACE2 CLEC4G CD209 CLEC4M KPNA2 PPIA BCL2L1 KPNA4 TMPRSS2 ANPEP DPP4 CHMP4B CHMP2B CAV1   |
| GO:0019058 | viral life cycle      | 18/117    | 289/18493 | 0        | KPNB1 XPO1 ACE2 CLEC4G CD209 CLEC4M PPIA BCL2 TMPRSS2 ANPEP DPP4 ANXA2 CHMP4B PABPC1 PPIH CHMP2B DDX5 CAV1 |

| ID         | Description                                                                                  | GeneRatio | BgRatio   | p.adjust | geneID                                                                                      |
|------------|----------------------------------------------------------------------------------------------|-----------|-----------|----------|---------------------------------------------------------------------------------------------|
| GO:0019048 | modulation by virus of host morphology or physiology                                         | 8/117     | 38/18493  | 0        | KPNB1 TGFB1 SMAD3 CD209 CLEC4M KPNA2 BCL2L1 KPNA4                                           |
| GO:0051817 | modification of morphology or physiology of other organism involved in symbiotic interaction | 11/117    | 112/18493 | 0        | KPNB1 JUN TGFB1 SMAD3 CD209 CLEC4M KPNA2 SFTPD BCL2L1 KPNA4 ANXA2                           |
| GO:0042176 | regulation of protein catabolic process                                                      | 17/117    | 375/18493 | 0        | PSMC2 STX5 PHB XPO1 SMAD3 ANXA2 PSMD1 SNX9 GSK3A GSK3B RYBP HGS BAG6 CHEK2 EEF1A1 CAV1 SGTA |
| GO:0044003 | modification by symbiont of host morphology or physiology                                    | 8/117     | 46/18493  | 0        | KPNB1 TGFB1 SMAD3 CD209 CLEC4M KPNA2 BCL2L1 KPNA4                                           |
| GO:0009895 | negative regulation of catabolic process                                                     | 14/117    | 287/18493 | 0        | SCFD1 PHB STAT3 SMAD3 MCL1 BCL2 SYNCRIP ANXA2 CHMP4B GSK3A PABPC1 RYBP BAG6 SGTA            |
| GO:0035821 | modification of morphology or physiology of other organism                                   | 11/117    | 161/18493 | 0        | KPNB1 JUN TGFB1 SMAD3 CD209 CLEC4M KPNA2 SFTPD BCL2L1 KPNA4 ANXA2                           |
| GO:0043903 | regulation of symbiosis, encompassing mutualism through parasitism                           | 12/117    | 203/18493 | 0        | JUN SFTPD PPIA BCL2 TMRSS2 ANXA2 CHMP4B PABPC1 PPIH CHMP2B DDX5 CAV1                        |
| GO:0038034 | signal transduction in absence of ligand                                                     | 8/117     | 71/18493  | 0        | PPP1CA BCL2L1 BCL2L2 MCL1 BCL2A1 BCL2 GSK3A GSK3B                                           |
| GO:0097192 | extrinsic apoptotic signaling pathway in absence of ligand                                   | 8/117     | 71/18493  | 0        | PPP1CA BCL2L1 BCL2L2 MCL1 BCL2A1 BCL2 GSK3A GSK3B                                           |
| GO:0006413 | translational initiation                                                                     | 11/117    | 194/18493 | 0        | PPP1CA RPL13A EIF3E EIF3I EIF3F PABPC1 NPM1 RPL19 DDX1 MIF4GD RPS20                         |
| GO:0031330 | negative regulation of cellular catabolic process                                            | 12/117    | 245/18493 | 0        | SCFD1 STAT3 MCL1 BCL2 SYNCRIP ANXA2 CHMP4B GSK3A PABPC1 RYBP BAG6 SGTA                      |
| GO:0048524 | positive regulation of viral process                                                         | 8/117     | 86/18493  | 0        | JUN PPIA TMRSS2 ANXA2 CHMP4B PABPC1 PPIH CHMP2B                                             |
| GO:0046718 | viral entry into host cell                                                                   | 9/117     | 121/18493 | 0        | ACE2 CLEC4G CD209 CLEC4M PPIA TMRSS2 ANPEP DPP4 CAV1                                        |
| GO:1903902 | positive regulation of viral life cycle                                                      | 7/117     | 60/18493  | 0        | PPIA TMRSS2 ANXA2 CHMP4B PABPC1 PPIH CHMP2B                                                 |
| GO:2001235 | positive regulation of apoptotic signaling pathway                                           | 10/117    | 170/18493 | 0        | PPP1CA SMAD3 BCL2L1 MCL1 BCL2 PRKRA NMT1 GSK3A GSK3B CAV1                                   |
| GO:0046794 | transport of virus                                                                           | 5/117     | 20/18493  | 0        | KPNB1 XPO1 CD209 CLEC4M CAV1                                                                |
| GO:0030260 | entry into host cell                                                                         | 9/117     | 133/18493 | 0        | ACE2 CLEC4G CD209 CLEC4M PPIA TMRSS2 ANPEP DPP4 CAV1                                        |
| GO:0044409 | entry into host                                                                              | 9/117     | 133/18493 | 0        | ACE2 CLEC4G CD209 CLEC4M PPIA TMRSS2 ANPEP DPP4 CAV1                                        |

| <b>ID</b>  | <b>Description</b>                                                  | <b>GeneRatio</b> | <b>BgRatio</b> | <b>p.adjust</b> | <b>geneID</b>                                                                      |
|------------|---------------------------------------------------------------------|------------------|----------------|-----------------|------------------------------------------------------------------------------------|
| GO:0051806 | entry into cell of other organism involved in symbiotic interaction | 9/117            | 133/18493      | 0               | ACE2 CLEC4G CD209 CLEC4M PPIA TMPRSS2 ANPEP DPP4 CAV1                              |
| GO:0051828 | entry into other organism involved in symbiotic interaction         | 9/117            | 133/18493      | 0               | ACE2 CLEC4G CD209 CLEC4M PPIA TMPRSS2 ANPEP DPP4 CAV1                              |
| GO:2001233 | regulation of apoptotic signaling pathway                           | 14/117           | 391/18493      | 0               | PPP1CA SMAD3 BCL2L1 BCL2L2 MCL1 BCL2A1 BCL2 PRKRA NMT1 NONO GSK3A GSK3B PARP1 CAV1 |
| GO:0097191 | extrinsic apoptotic signaling pathway                               | 11/117           | 224/18493      | 0               | PPP1CA TGFB1 SMAD3 BCL2L1 BCL2L2 MCL1 BCL2A1 BCL2 GSK3A GSK3B CAV1                 |
| GO:0050792 | regulation of viral process                                         | 10/117           | 177/18493      | 0               | JUN PPIA BCL2 TMPRSS2 ANXA2 CHMP4B PABPC1 PPIH CHMP2B DDX5                         |
| GO:1903900 | regulation of viral life cycle                                      | 9/117            | 140/18493      | 0               | PPIA BCL2 TMPRSS2 ANXA2 CHMP4B PABPC1 PPIH CHMP2B DDX5                             |
| GO:0097193 | intrinsic apoptotic signaling pathway                               | 12/117           | 287/18493      | 0               | BCL2L1 BCL2L2 MCL1 BCL2A1 BCL2 PRKRA NONO PARP1 BAG6 CHEK2 DDX5 CAV1               |
| GO:0044650 | adhesion of symbiont to host cell                                   | 4/117            | 12/18493       | 0               | ACE2 CD209 CLEC4M SFTPD                                                            |
| GO:2001242 | regulation of intrinsic apoptotic signaling pathway                 | 9/117            | 161/18493      | 0               | BCL2L1 BCL2L2 MCL1 BCL2A1 BCL2 PRKRA NONO PARP1 CAV1                               |
| GO:0007183 | SMAD protein complex assembly                                       | 4/117            | 13/18493       | 0               | TGFB1 SMAD3 PARP1 FKBP1A                                                           |
| GO:0046605 | regulation of centrosome cycle                                      | 6/117            | 56/18493       | 0               | XPO1 ATF5 CHMP4B KIF11 NPM1 CHMP2B                                                 |
| GO:0072593 | reactive oxygen species metabolic process                           | 11/117           | 276/18493      | 0               | STAT3 TGFB1 SMAD3 COX2 ACE2 SFTPD BCL2 HSPD1 GBF1 DDAH2 CAV1                       |
| GO:0044766 | multi-organism transport                                            | 5/117            | 33/18493       | 0               | KPNB1 XPO1 CD209 CLEC4M CAV1                                                       |
| GO:1902579 | multi-organism localization                                         | 5/117            | 33/18493       | 0               | KPNB1 XPO1 CD209 CLEC4M CAV1                                                       |
| GO:0044406 | adhesion of symbiont to host                                        | 4/117            | 15/18493       | 0               | ACE2 CD209 CLEC4M SFTPD                                                            |
| GO:2000377 | regulation of reactive oxygen species metabolic process             | 9/117            | 185/18493      | 0               | STAT3 TGFB1 SMAD3 COX2 ACE2 BCL2 HSPD1 DDAH2 CAV1                                  |
| GO:0075733 | intracellular transport of virus                                    | 4/117            | 17/18493       | 0               | KPNB1 XPO1 CD209 CLEC4M                                                            |
| GO:0008630 | intrinsic apoptotic signaling pathway in response to DNA damage     | 7/117            | 102/18493      | 0               | BCL2L1 BCL2L2 MCL1 BCL2A1 BCL2 BAG6 CHEK2                                          |
| GO:0051098 | regulation of binding                                               | 12/117           | 369/18493      | 0               | JUN PPP1CA TGFB1 SMAD3 BCL2 ANXA2 EIF3E GSK3B PARP1 FKBP1A MARK3 CAV1              |
| GO:0043900 | regulation of multi-organism process                                | 12/117           | 371/18493      | 0               | JUN SFTPD PPIA BCL2 TMPRSS2 ANXA2 CHMP4B PABPC1 PPIH CHMP2B DDX5 CAV1              |

| ID         | Description                                               | GeneRatio | BgRatio   | p.adjust | geneID                                                                      |
|------------|-----------------------------------------------------------|-----------|-----------|----------|-----------------------------------------------------------------------------|
| GO:0046902 | regulation of mitochondrial membrane permeability         | 6/117     | 73/18493  | 0        | STAT3 BCL2L1 BCL2 NMT1 GSK3A GSK3B                                          |
| GO:0061614 | pri-miRNA transcription by RNA polymerase II              | 5/117     | 44/18493  | 0.001    | JUN STAT3 TGFB1 SMAD3 DDX5                                                  |
| GO:1903409 | reactive oxygen species biosynthetic process              | 7/117     | 115/18493 | 0.001    | STAT3 SMAD3 COX2 HSPD1 GBF1 DDAH2 CAV1                                      |
| GO:0043902 | positive regulation of multi-organism process             | 8/117     | 162/18493 | 0.001    | JUN PPIA TMRSS2 ANXA2 CHMP4B PABPC1 PPIH CHMP2B                             |
| GO:0006446 | regulation of translational initiation                    | 6/117     | 77/18493  | 0.001    | PPP1CA RPL13A EIF3E NPM1 DDX1 MIF4GD                                        |
| GO:0030193 | regulation of blood coagulation                           | 6/117     | 77/18493  | 0.001    | CD9 CEACAM1 ANXA2 SERPING1 VKORC1 CAV1                                      |
| GO:1900046 | regulation of hemostasis                                  | 6/117     | 77/18493  | 0.001    | CD9 CEACAM1 ANXA2 SERPING1 VKORC1 CAV1                                      |
| GO:0019079 | viral genome replication                                  | 7/117     | 117/18493 | 0.001    | CD209 CLEC4M PPIA BCL2 PABPC1 PPIH DDX5                                     |
| GO:0006457 | protein folding                                           | 9/117     | 218/18493 | 0.001    | PPIA DNAJB1 HSPD1 HSPA9 FKBP1A PPIG PPIH PFDN5 SGTA                         |
| GO:0035196 | production of miRNAs involved in gene silencing by miRNA  | 5/117     | 46/18493  | 0.001    | TGFB1 SMAD3 PRKRA HNRNPA2B1 DDX5                                            |
| GO:0008637 | apoptotic mitochondrial changes                           | 7/117     | 121/18493 | 0.001    | JUN BCL2L1 BCL2 HSPD1 NMT1 GSK3A GSK3B                                      |
| GO:0090559 | regulation of membrane permeability                       | 6/117     | 81/18493  | 0.001    | STAT3 BCL2L1 BCL2 NMT1 GSK3A GSK3B                                          |
| GO:0050818 | regulation of coagulation                                 | 6/117     | 82/18493  | 0.001    | CD9 CEACAM1 ANXA2 SERPING1 VKORC1 CAV1                                      |
| GO:0051656 | establishment of organelle localization                   | 13/117    | 491/18493 | 0.001    | SCFD1 YKT6 KPNB1 STX5 XPO1 CHMP4B GBF1 GSK3B NPM1 CHMP2B SNAP47 TERF1 DCTN2 |
| GO:0031050 | dsRNA processing                                          | 5/117     | 49/18493  | 0.001    | TGFB1 SMAD3 PRKRA HNRNPA2B1 DDX5                                            |
| GO:0070918 | production of small RNA involved in gene silencing by RNA | 5/117     | 49/18493  | 0.001    | TGFB1 SMAD3 PRKRA HNRNPA2B1 DDX5                                            |
| GO:0045862 | positive regulation of proteolysis                        | 11/117    | 352/18493 | 0.001    | PSMC2 PHB STAT3 SMAD3 HSPD1 SNX9 GSK3A GSK3B BAG6 CAV1 SGTA                 |
| GO:2000209 | regulation of anoikis                                     | 4/117     | 24/18493  | 0.001    | MCL1 BCL2 CHEK2 CAV1                                                        |
| GO:0006913 | nucleocytoplasmic transport                               | 11/117    | 357/18493 | 0.001    | KPNB1 STAT3 XPO1 TGFB1 SMAD3 HNRNPA1 KPNA2 KPNA4 HNRNPA2B1 GSK3B NPM1       |
| GO:0019054 | modulation by virus of host process                       | 4/117     | 25/18493  | 0.001    | KPNB1 KPNA2 BCL2L1 KPNA4                                                    |
| GO:0051169 | nuclear transport                                         | 11/117    | 360/18493 | 0.001    | KPNB1 STAT3 XPO1 TGFB1 SMAD3 HNRNPA1 KPNA2 KPNA4 HNRNPA2B1 GSK3B NPM1       |

| ID         | Description                                                         | GeneRatio | BgRatio   | p.adjust | geneID                                                                        |
|------------|---------------------------------------------------------------------|-----------|-----------|----------|-------------------------------------------------------------------------------|
| GO:1901214 | regulation of neuron death                                          | 10/117    | 296/18493 | 0.001    | JUN STAT3 BCL2L1 MCL1 BCL2 HSPD1 CHMP4B NONO GSK3B PARP1                      |
| GO:0051099 | positive regulation of binding                                      | 8/117     | 181/18493 | 0.001    | TGFB1 ANXA2 EIF3E GSK3B PARP1 FKBP1A MARK3 CAV1                               |
| GO:0042026 | protein refolding                                                   | 4/117     | 26/18493  | 0.001    | HSPD1 HSPA9 FKBP1A PPIG                                                       |
| GO:0061041 | regulation of wound healing                                         | 7/117     | 134/18493 | 0.001    | SMAD3 CD9 CEACAM1 ANXA2 SERPING1 VKORC1 CAV1                                  |
| GO:1902895 | positive regulation of pri-miRNA transcription by RNA polymerase II | 4/117     | 27/18493  | 0.001    | JUN STAT3 TGFB1 SMAD3                                                         |
| GO:0006402 | mRNA catabolic process                                              | 10/117    | 307/18493 | 0.001    | XPO1 SYNCRIP RPL13A EIF3E PABPC1 PABPC4 NPM1 RPL19 RPS20 DDX5                 |
| GO:0019062 | virion attachment to host cell                                      | 3/117     | 10/18493  | 0.001    | ACE2 CD209 CLEC4M                                                             |
| GO:0042110 | T cell activation                                                   | 12/117    | 451/18493 | 0.001    | STAT3 TGFB1 SMAD3 CLEC4G CD209 SFTPD BCL2 DPP4 CEACAM1 HSPD1 FKBP1A CAV1      |
| GO:1903426 | regulation of reactive oxygen species biosynthetic process          | 6/117     | 94/18493  | 0.001    | STAT3 SMAD3 COX2 HSPD1 DDAH2 CAV1                                             |
| GO:2001244 | positive regulation of intrinsic apoptotic signaling pathway        | 5/117     | 57/18493  | 0.001    | BCL2L1 MCL1 BCL2 PRKRA CAV1                                                   |
| GO:0034248 | regulation of cellular amide metabolic process                      | 12/117    | 453/18493 | 0.001    | STAT3 PPP1CA SYNCRIP RPL13A EIF3E GSK3A PABPC1 NPM1 NCL DDX1 MIF4GD EEF1A1    |
| GO:0016050 | vesicle organization                                                | 10/117    | 314/18493 | 0.001    | SCFD1 STX5 BCL2 ANXA2 CHMP4B GBF1 HGS CHMP2B SNAP47 CAV1                      |
| GO:0044068 | modulation by symbiont of host cellular process                     | 4/117     | 29/18493  | 0.001    | KPNB1 KPNA2 BCL2L1 KPNA4                                                      |
| GO:2001243 | negative regulation of intrinsic apoptotic signaling pathway        | 6/117     | 96/18493  | 0.001    | BCL2L1 BCL2L2 MCL1 BCL2A1 BCL2 NONO                                           |
| GO:0090150 | establishment of protein localization to membrane                   | 10/117    | 317/18493 | 0.001    | BCL2 RPL13A NMT1 CHMP4B SRP54 RPL19 BAG6 SNAP47 RPS20 SGTA                    |
| GO:0008380 | RNA splicing                                                        | 12/117    | 463/18493 | 0.001    | HNRNPA1 ZCRB1 SYNCRIP PTBP1 HNRNPA2B1 HNRNPA3 NONO PABPC1 DDX1 PPIG PPIH DDX5 |
| GO:0090307 | mitotic spindle assembly                                            | 5/117     | 60/18493  | 0.001    | KPNB1 CHMP4B KIF11 CHMP2B CHEK2                                               |
| GO:0070972 | protein localization to endoplasmic reticulum                       | 7/117     | 146/18493 | 0.002    | RPL13A CHMP4B GBF1 SRP54 RPL19 RPS20 SGTA                                     |
| GO:0002183 | cytoplasmic translational initiation                                | 4/117     | 31/18493  | 0.002    | RPL13A EIF3E EIF3I EIF3F                                                      |
| GO:1901215 | negative regulation of neuron death                                 | 8/117     | 201/18493 | 0.002    | JUN STAT3 BCL2L1 BCL2 HSPD1 CHMP4B NONO GSK3B                                 |
| GO:0061025 | membrane fusion                                                     | 7/117     | 149/18493 | 0.002    | YKT6 STX5 PPIA CD9 ANXA2 CHMP2B SNAP47                                        |

| ID         | Description                                                                                                  | GeneRatio | BgRatio   | p.adjust | geneID                                                              |
|------------|--------------------------------------------------------------------------------------------------------------|-----------|-----------|----------|---------------------------------------------------------------------|
| GO:1903311 | regulation of mRNA metabolic process                                                                         | 9/117     | 264/18493 | 0.002    | XPO1 HNRNPA1 SYNCRIP PTBP1<br>HNRNPA2B1 PABPC1 PABPC4<br>NPM1 DDX5  |
| GO:1901030 | positive regulation of mitochondrial outer membrane permeabilization involved in apoptotic signaling pathway | 4/117     | 32/18493  | 0.002    | BCL2 NMT1 GSK3A GSK3B                                               |
| GO:1901800 | positive regulation of proteasomal protein catabolic process                                                 | 6/117     | 103/18493 | 0.002    | PSMC2 GSK3A GSK3B BAG6<br>CAV1 SGTA                                 |
| GO:0070997 | neuron death                                                                                                 | 10/117    | 335/18493 | 0.002    | JUN STAT3 BCL2L1 MCL1 BCL2<br>HSPD1 CHMP4B NONO GSK3B<br>PARP1      |
| GO:0034504 | protein localization to nucleus                                                                              | 9/117     | 269/18493 | 0.002    | KPNB1 STAT3 XPO1 TGFB1<br>SMAD3 KPNA2 KPNA4 GSK3B<br>PARP1          |
| GO:0006401 | RNA catabolic process                                                                                        | 10/117    | 340/18493 | 0.002    | XPO1 SYNCRIP RPL13A EIF3E<br>PABPC1 PABPC4 NPM1 RPL19<br>RPS20 DDX5 |
| GO:0043276 | anoikis                                                                                                      | 4/117     | 34/18493  | 0.002    | MCL1 BCL2 CHEK2 CAV1                                                |
| GO:0045732 | positive regulation of protein catabolic process                                                             | 8/117     | 212/18493 | 0.002    | PSMC2 STX5 SNX9 GSK3A<br>GSK3B BAG6 CAV1 SGTA                       |
| GO:0022618 | ribonucleoprotein complex assembly                                                                           | 9/117     | 275/18493 | 0.002    | RSL24D1 RPL13A EIF3E EIF3I<br>EIF3F NPM1 G3BP1 G3BP2 DDX1           |
| GO:0007052 | mitotic spindle organization                                                                                 | 6/117     | 108/18493 | 0.002    | KPNB1 CHMP4B KIF11 CHMP2B<br>CHEK2 DCTN2                            |
| GO:0032885 | regulation of polysaccharide biosynthetic process                                                            | 4/117     | 35/18493  | 0.002    | PPP1CA TGFB1 GSK3A GSK3B                                            |
| GO:1903034 | regulation of response to wounding                                                                           | 7/117     | 160/18493 | 0.002    | SMAD3 CD9 CEACAM1 ANXA2<br>SERPING1 VKORC1 CAV1                     |
| GO:0001732 | formation of cytoplasmic translation initiation complex                                                      | 3/117     | 14/18493  | 0.003    | EIF3E EIF3I EIF3F                                                   |
| GO:1904294 | positive regulation of ERAD pathway                                                                          | 3/117     | 14/18493  | 0.003    | BAG6 CAV1 SGTA                                                      |
| GO:1902893 | regulation of pri-miRNA transcription by RNA polymerase II                                                   | 4/117     | 37/18493  | 0.003    | JUN STAT3 TGFB1 SMAD3                                               |
| GO:0062012 | regulation of small molecule metabolic process                                                               | 10/117    | 355/18493 | 0.003    | KPNB1 STAT3 PPP1CA TGFB1<br>COX2 CEACAM1 GSK3A GSK3B<br>PARP1 CAV1  |
| GO:0061045 | negative regulation of wound healing                                                                         | 5/117     | 72/18493  | 0.003    | SMAD3 CD9 CEACAM1 ANXA2<br>SERPING1                                 |
| GO:0071826 | ribonucleoprotein complex subunit organization                                                               | 9/117     | 289/18493 | 0.003    | RSL24D1 RPL13A EIF3E EIF3I<br>EIF3F NPM1 G3BP1 G3BP2 DDX1           |
| GO:0045047 | protein targeting to ER                                                                                      | 6/117     | 117/18493 | 0.003    | RPL13A CHMP4B SRP54 RPL19<br>RPS20 SGTA                             |
| GO:1903052 | positive regulation of proteolysis involved in cellular protein catabolic process                            | 6/117     | 118/18493 | 0.003    | PSMC2 GSK3A GSK3B BAG6<br>CAV1 SGTA                                 |
| GO:0000413 | protein peptidyl-prolyl isomerization                                                                        | 4/117     | 39/18493  | 0.003    | PPIA FKBP1A PPIG PPIH                                               |



| <b>ID</b>  | <b>Description</b>                                                                                  | <b>GeneRatio</b> | <b>BgRatio</b> | <b>p.adjust</b> | <b>geneID</b>                                                       |
|------------|-----------------------------------------------------------------------------------------------------|------------------|----------------|-----------------|---------------------------------------------------------------------|
| GO:0007098 | centrosome cycle                                                                                    | 6/117            | 119/18493      | 0.003           | XPO1 ATF5 CHMP4B KIF11 NPM1 CHMP2B                                  |
| GO:0006458 | 'de novo' protein folding                                                                           | 4/117            | 40/18493       | 0.003           | DNAJB1 HSPD1 HSPA9 FKBP1A                                           |
| GO:0032881 | regulation of polysaccharide metabolic process                                                      | 4/117            | 40/18493       | 0.003           | PPP1CA TGFB1 GSK3A GSK3B                                            |
| GO:0032434 | regulation of proteasomal ubiquitin-dependent protein catabolic process                             | 6/117            | 121/18493      | 0.003           | GSK3A GSK3B RYBP BAG6 CAV1 SGTA                                     |
| GO:0072599 | establishment of protein localization to endoplasmic reticulum                                      | 6/117            | 121/18493      | 0.003           | RPL13A CHMP4B SRP54 RPL19 RPS20 SGTA                                |
| GO:0070507 | regulation of microtubule cytoskeleton organization                                                 | 7/117            | 175/18493      | 0.003           | XPO1 ATF5 CHMP4B KIF11 GSK3B NPM1 CHMP2B                            |
| GO:1901028 | regulation of mitochondrial outer membrane permeabilization involved in apoptotic signaling pathway | 4/117            | 41/18493       | 0.004           | BCL2 NMT1 GSK3A GSK3B                                               |
| GO:0000377 | RNA splicing, via transesterification reactions with bulged adenosine as nucleophile                | 10/117           | 374/18493      | 0.004           | HNRNPA1 ZCRB1 SYNCRIP PTBP1 HNRNPA2B1 HNRNPA3 PABPC1 DDX1 PPIH DDX5 |
| GO:0000398 | mRNA splicing, via spliceosome                                                                      | 10/117           | 374/18493      | 0.004           | HNRNPA1 ZCRB1 SYNCRIP PTBP1 HNRNPA2B1 HNRNPA3 PABPC1 DDX1 PPIH DDX5 |
| GO:0051170 | import into nucleus                                                                                 | 7/117            | 178/18493      | 0.004           | KPNB1 STAT3 TGFB1 SMAD3 HNRNPA1 KPNA2 KPNA4                         |
| GO:0010498 | proteasomal protein catabolic process                                                               | 11/117           | 452/18493      | 0.004           | PSMC2 SKP2 PSMD1 GSK3A GSK3B RYBP BAG6 PSMA2 CAV1 UBE2I SGTA        |
| GO:0010824 | regulation of centrosome duplication                                                                | 4/117            | 42/18493       | 0.004           | XPO1 CHMP4B NPM1 CHMP2B                                             |
| GO:0000375 | RNA splicing, via transesterification reactions                                                     | 10/117           | 377/18493      | 0.004           | HNRNPA1 ZCRB1 SYNCRIP PTBP1 HNRNPA2B1 HNRNPA3 PABPC1 DDX1 PPIH DDX5 |
| GO:0061136 | regulation of proteasomal protein catabolic process                                                 | 7/117            | 179/18493      | 0.004           | PSMC2 GSK3A GSK3B RYBP BAG6 CAV1 SGTA                               |
| GO:0033143 | regulation of intracellular steroid hormone receptor signaling pathway                              | 5/117            | 79/18493       | 0.004           | PHB SKP2 PARP1 DDX5 UBE2I                                           |
| GO:1903362 | regulation of cellular protein catabolic process                                                    | 8/117            | 242/18493      | 0.004           | PSMC2 ANXA2 GSK3A GSK3B RYBP BAG6 CAV1 SGTA                         |
| GO:0045912 | negative regulation of carbohydrate metabolic process                                               | 4/117            | 43/18493       | 0.004           | STAT3 TGFB1 GSK3A GSK3B                                             |
| GO:0033145 | positive regulation of intracellular steroid hormone receptor signaling pathway                     | 3/117            | 17/18493       | 0.004           | SKP2 PARP1 UBE2I                                                    |
| GO:2000811 | negative regulation of anoikis                                                                      | 3/117            | 17/18493       | 0.004           | MCL1 BCL2 CAV1                                                      |
| GO:0042177 | negative regulation of protein catabolic process                                                    | 6/117            | 128/18493      | 0.004           | PHB SMAD3 ANXA2 RYBP BAG6 SGTA                                      |
| GO:0043112 | receptor metabolic process                                                                          | 7/117            | 184/18493      | 0.004           | TGFB1 ACE2 CD9 CEACAM1 ANXA2 CAMLG CAV1                             |

| ID         | Description                                                              | GeneRatio | BgRatio   | p.adjust | geneID                                                             |
|------------|--------------------------------------------------------------------------|-----------|-----------|----------|--------------------------------------------------------------------|
| GO:1902850 | microtubule cytoskeleton organization involved in mitosis                | 6/117     | 129/18493 | 0.004    | KPNB1 CHMP4B KIF11 CHMP2B CHEK2 DCTN2                              |
| GO:0009615 | response to virus                                                        | 9/117     | 315/18493 | 0.004    | IRF3 BCL2L1 BCL2 SKP2 PRKRA IKBKB GBF1 DDX1 PSMA2                  |
| GO:0006914 | autophagy                                                                | 11/117    | 466/18493 | 0.004    | SCFD1 TFEB ACBD5 MCL1 BCL2 CHMP4B GSK3A HGS CHMP2B EEF1A1 ATP6V1G1 |
| GO:0061919 | process utilizing autophagic mechanism                                   | 11/117    | 466/18493 | 0.004    | SCFD1 TFEB ACBD5 MCL1 BCL2 CHMP4B GSK3A HGS CHMP2B EEF1A1 ATP6V1G1 |
| GO:0043161 | proteasome-mediated ubiquitin-dependent protein catabolic process        | 10/117    | 389/18493 | 0.004    | SKP2 PSMD1 GSK3A GSK3B RYBP BAG6 PSMA2 CAV1 UBE2I SGTA             |
| GO:0007006 | mitochondrial membrane organization                                      | 6/117     | 131/18493 | 0.004    | STAT3 BCL2L1 BCL2 NMT1 GSK3A GSK3B                                 |
| GO:0008631 | intrinsic apoptotic signaling pathway in response to oxidative stress    | 4/117     | 45/18493  | 0.004    | MCL1 BCL2 NONO PARP1                                               |
| GO:1903035 | negative regulation of response to wounding                              | 5/117     | 84/18493  | 0.004    | SMAD3 CD9 CEACAM1 ANXA2 SERPING1                                   |
| GO:0031023 | microtubule organizing center organization                               | 6/117     | 133/18493 | 0.005    | XPO1 ATF5 CHMP4B KIF11 NPM1 CHMP2B                                 |
| GO:2001239 | regulation of extrinsic apoptotic signaling pathway in absence of ligand | 4/117     | 46/18493  | 0.005    | PPP1CA BCL2L1 MCL1 BCL2                                            |
| GO:0046677 | response to antibiotic                                                   | 9/117     | 323/18493 | 0.005    | PHB JUN STAT3 HNRNPA1 BCL2L1 BCL2 KPNA4 HSPD1 VKORC1               |
| GO:0035722 | interleukin-12-mediated signaling pathway                                | 4/117     | 47/18493  | 0.005    | PPIA ANXA2 HNRNPA2B1 HSPA9                                         |
| GO:0051205 | protein insertion into membrane                                          | 4/117     | 47/18493  | 0.005    | BCL2 NMT1 BAG6 SGTA                                                |
| GO:0007159 | leukocyte cell-cell adhesion                                             | 9/117     | 327/18493 | 0.005    | TGFB1 CLEC4G CD209 CLEC4M SFTPD DPP4 CEACAM1 HSPD1 CAV1            |
| GO:0001889 | liver development                                                        | 6/117     | 137/18493 | 0.005    | JUN TGFB1 SMAD3 CEACAM1 ACO2 RPL19                                 |
| GO:0006417 | regulation of translation                                                | 10/117    | 402/18493 | 0.005    | STAT3 PPP1CA SYNCRIP RPL13A EIF3E PABPC1 NPM1 NCL DDX1 MIF4GD      |
| GO:0035304 | regulation of protein dephosphorylation                                  | 6/117     | 138/18493 | 0.005    | TGFB1 IKBKB PTBP1 GSK3B FKBP1A RCAN3                               |
| GO:1903364 | positive regulation of cellular protein catabolic process                | 6/117     | 138/18493 | 0.005    | PSMC2 GSK3A GSK3B BAG6 CAV1 SGTA                                   |
| GO:0022613 | ribonucleoprotein complex biogenesis                                     | 11/117    | 485/18493 | 0.005    | RSL24D1 XPO1 RPL13A EIF3E EIF3I EIF3F NPM1 G3BP1 G3BP2 DDX1 LAS1L  |
| GO:0071349 | cellular response to interleukin-12                                      | 4/117     | 49/18493  | 0.005    | PPIA ANXA2 HNRNPA2B1 HSPA9                                         |

| ID         | Description                                                                 | GeneRatio | BgRatio   | p.adjust | geneID                                                       |
|------------|-----------------------------------------------------------------------------|-----------|-----------|----------|--------------------------------------------------------------|
| GO:0009896 | positive regulation of catabolic process                                    | 10/117    | 407/18493 | 0.005    | PSMC2 TFEB STX5 SNX9 GSK3A<br>GSK3B PABPC1 BAG6 CAV1<br>SGTA |
| GO:0061008 | hepaticobiliary system development                                          | 6/117     | 140/18493 | 0.005    | JUN TGFB1 SMAD3 CEACAM1<br>ACO2 RPL19                        |
| GO:0045069 | regulation of viral genome replication                                      | 5/117     | 90/18493  | 0.005    | PPIA BCL2 PABPC1 PPIH DDX5                                   |
| GO:0051236 | establishment of RNA localization                                           | 7/117     | 198/18493 | 0.005    | XPO1 HNRNPA1 HNRNPA2B1<br>HNRNPA3 NPM1 G3BP2 TERF1           |
| GO:0070671 | response to interleukin-12                                                  | 4/117     | 50/18493  | 0.006    | PPIA ANXA2 HNRNPA2B1 HSPA9                                   |
| GO:0043523 | regulation of neuron apoptotic process                                      | 7/117     | 202/18493 | 0.006    | JUN BCL2L1 MCL1 BCL2 HSPD1<br>NONO PARP1                     |
| GO:0071359 | cellular response to dsRNA                                                  | 3/117     | 21/18493  | 0.006    | IRF3 NPM1 CAV1                                               |
| GO:1904886 | beta-catenin destruction complex<br>disassembly                             | 3/117     | 21/18493  | 0.006    | PPP1CA GSK3B CAV1                                            |
| GO:0097345 | mitochondrial outer membrane<br>permeabilization                            | 4/117     | 51/18493  | 0.006    | BCL2 NMT1 GSK3A GSK3B                                        |
| GO:0002181 | cytoplasmic translation                                                     | 5/117     | 93/18493  | 0.006    | RPL13A EIF3E EIF3I EIF3F RPL19                               |
| GO:0032886 | regulation of microtubule-based process                                     | 7/117     | 204/18493 | 0.006    | XPO1 ATF5 CHMP4B KIF11<br>GSK3B NPM1 CHMP2B                  |
| GO:0030195 | negative regulation of blood coagulation                                    | 4/117     | 52/18493  | 0.006    | CD9 CEACAM1 ANXA2<br>SERPING1                                |
| GO:1900047 | negative regulation of hemostasis                                           | 4/117     | 52/18493  | 0.006    | CD9 CEACAM1 ANXA2<br>SERPING1                                |
| GO:0032092 | positive regulation of protein binding                                      | 5/117     | 94/18493  | 0.006    | ANXA2 GSK3B FKBP1A MARK3<br>CAV1                             |
| GO:0035303 | regulation of dephosphorylation                                             | 7/117     | 206/18493 | 0.006    | TGFB1 SMAD3 IKBKB PTBP1<br>GSK3B FKBP1A RCAN3                |
| GO:2000058 | regulation of ubiquitin-dependent protein<br>catabolic process              | 6/117     | 147/18493 | 0.006    | GSK3A GSK3B RYBP BAG6 CAV1<br>SGTA                           |
| GO:2000637 | positive regulation of gene silencing by<br>miRNA                           | 3/117     | 22/18493  | 0.006    | STAT3 TGFB1 DDX5                                             |
| GO:0010332 | response to gamma radiation                                                 | 4/117     | 53/18493  | 0.006    | BCL2L1 BCL2 PARP1 CHEK2                                      |
| GO:0043331 | response to dsRNA                                                           | 4/117     | 53/18493  | 0.006    | IRF3 NPM1 DDX1 CAV1                                          |
| GO:0016197 | endosomal transport                                                         | 7/117     | 208/18493 | 0.007    | YKT6 STX5 CHMP4B GBF1 SNX9<br>HGS CHMP2B                     |
| GO:0031331 | positive regulation of cellular catabolic<br>process                        | 9/117     | 347/18493 | 0.007    | PSMC2 TFEB SNX9 GSK3A<br>GSK3B PABPC1 BAG6 CAV1<br>SGTA      |
| GO:1903050 | regulation of proteolysis involved in<br>cellular protein catabolic process | 7/117     | 209/18493 | 0.007    | PSMC2 GSK3A GSK3B RYBP<br>BAG6 CAV1 SGTA                     |
| GO:0062014 | negative regulation of small molecule<br>metabolic process                  | 5/117     | 97/18493  | 0.007    | STAT3 TGFB1 CEACAM1 GSK3A<br>PARP1                           |

| <b>ID</b>  | <b>Description</b>                                                                       | <b>GeneRatio</b> | <b>BgRatio</b> | <b>p.adjust</b> | <b>geneID</b>                                              |
|------------|------------------------------------------------------------------------------------------|------------------|----------------|-----------------|------------------------------------------------------------|
| GO:2000379 | positive regulation of reactive oxygen species metabolic process                         | 5/117            | 98/18493       | 0.007           | TGFB1 SMAD3 COX2 ACE2 DDAH2                                |
| GO:0030856 | regulation of epithelial cell differentiation                                            | 6/117            | 151/18493      | 0.007           | IKBKB CEACAM1 GSK3A GSK3B H2AFY2 CAV1                      |
| GO:0060148 | positive regulation of posttranscriptional gene silencing                                | 3/117            | 23/18493       | 0.007           | STAT3 TGFB1 DDX5                                           |
| GO:0017038 | protein import                                                                           | 7/117            | 214/18493      | 0.007           | KPNB1 STAT3 TGFB1 SMAD3 KPNA2 KPNA4 HSPD1                  |
| GO:0018208 | peptidyl-proline modification                                                            | 4/117            | 56/18493       | 0.007           | PPIA FKBP1A PPIG PPIH                                      |
| GO:0050819 | negative regulation of coagulation                                                       | 4/117            | 56/18493       | 0.007           | CD9 CEACAM1 ANXA2 SERPING1                                 |
| GO:0048732 | gland development                                                                        | 10/117           | 434/18493      | 0.007           | STAT5A JUN TGFB1 SMAD3 COX2 BCL2 CEACAM1 ACO2 RPL19 CAV1   |
| GO:1901653 | cellular response to peptide                                                             | 9/117            | 356/18493      | 0.007           | STAT5A STAT3 TGFB1 CEACAM1 GSK3A GSK3B PARP1 CAV1 ATP6V1G1 |
| GO:1903203 | regulation of oxidative stress-induced neuron death                                      | 3/117            | 24/18493       | 0.008           | MCL1 NONO PARP1                                            |
| GO:0045216 | cell-cell junction organization                                                          | 6/117            | 155/18493      | 0.008           | TGFB1 SMAD3 ACE2 CD9 IKBKB CAV1                            |
| GO:0043393 | regulation of protein binding                                                            | 7/117            | 217/18493      | 0.008           | PPP1CA BCL2 ANXA2 GSK3B FKBP1A MARK3 CAV1                  |
| GO:1902110 | positive regulation of mitochondrial membrane permeability involved in apoptotic process | 4/117            | 57/18493       | 0.008           | BCL2 NMT1 GSK3A GSK3B                                      |
| GO:0006606 | protein import into nucleus                                                              | 6/117            | 157/18493      | 0.008           | KPNB1 STAT3 TGFB1 SMAD3 KPNA2 KPNA4                        |
| GO:2000378 | negative regulation of reactive oxygen species metabolic process                         | 4/117            | 58/18493       | 0.008           | STAT3 BCL2 HSPD1 CAV1                                      |
| GO:0036475 | neuron death in response to oxidative stress                                             | 3/117            | 25/18493       | 0.008           | MCL1 NONO PARP1                                            |
| GO:0045088 | regulation of innate immune response                                                     | 9/117            | 365/18493      | 0.009           | CD209 IRF3 SFTPD IKBKB CEACAM1 HSPD1 NONO SERPING1 CAV1    |
| GO:1902686 | mitochondrial outer membrane permeabilization involved in programmed cell death          | 4/117            | 59/18493       | 0.009           | BCL2 NMT1 GSK3A GSK3B                                      |
| GO:0051225 | spindle assembly                                                                         | 5/117            | 105/18493      | 0.009           | KPNB1 CHMP4B KIF11 CHMP2B CHEK2                            |
| GO:1903037 | regulation of leukocyte cell-cell adhesion                                               | 8/117            | 293/18493      | 0.009           | TGFB1 CLEC4G CD209 SFTPD DPP4 CEACAM1 HSPD1 CAV1           |
| GO:0061077 | chaperone-mediated protein folding                                                       | 4/117            | 60/18493       | 0.009           | DNAJB1 HSPA9 FKBP1A SGTA                                   |
| GO:0035794 | positive regulation of mitochondrial membrane permeability                               | 4/117            | 61/18493       | 0.01            | BCL2 NMT1 GSK3A GSK3B                                      |

| <b>ID</b>  | <b>Description</b>                                          | <b>GeneRatio</b> | <b>BgRatio</b> | <b>p.adjust</b> | <b>geneID</b>                    |
|------------|-------------------------------------------------------------|------------------|----------------|-----------------|----------------------------------|
| GO:1904356 | regulation of telomere maintenance via telomere lengthening | 4/117            | 61/18493       | 0.01            | HNRNPA1 HNRNPA2B1 PARP1<br>TERF1 |

## **2 HCOV-CLUSTER\_SET**

### **2.1 GO ENRICHMENT**

GO Enrichment Analysis after FDR control of a gene set.

# MOLECULAR FUNCTION

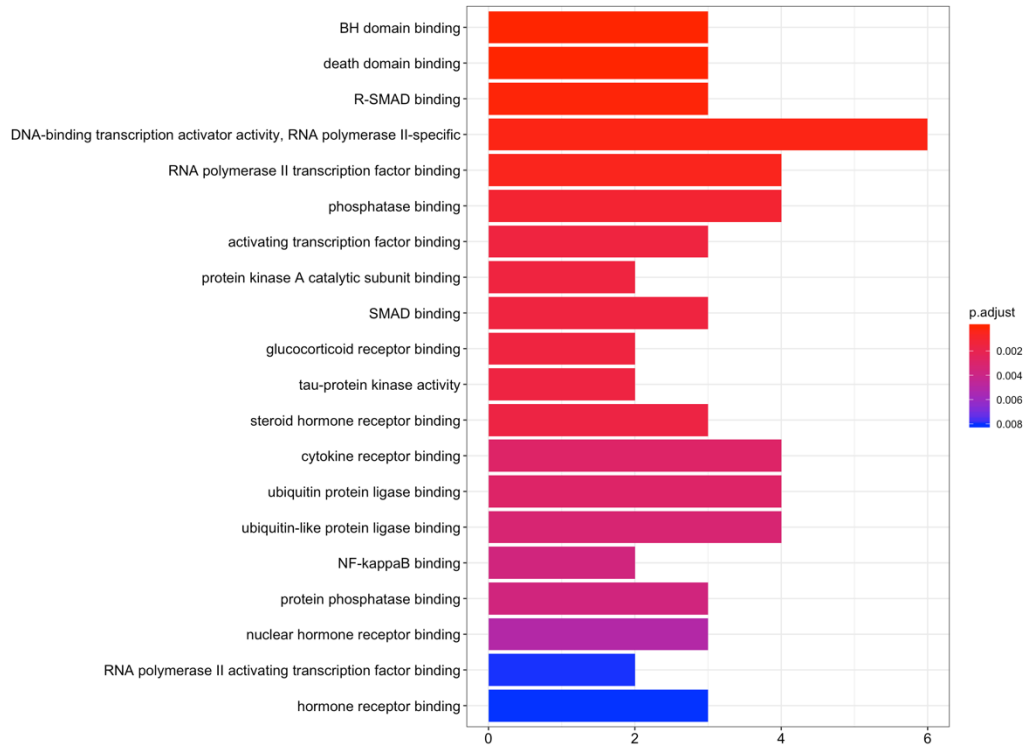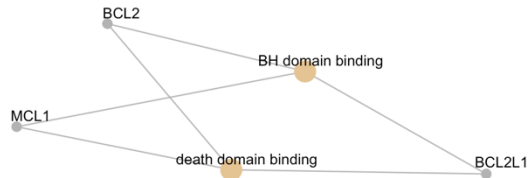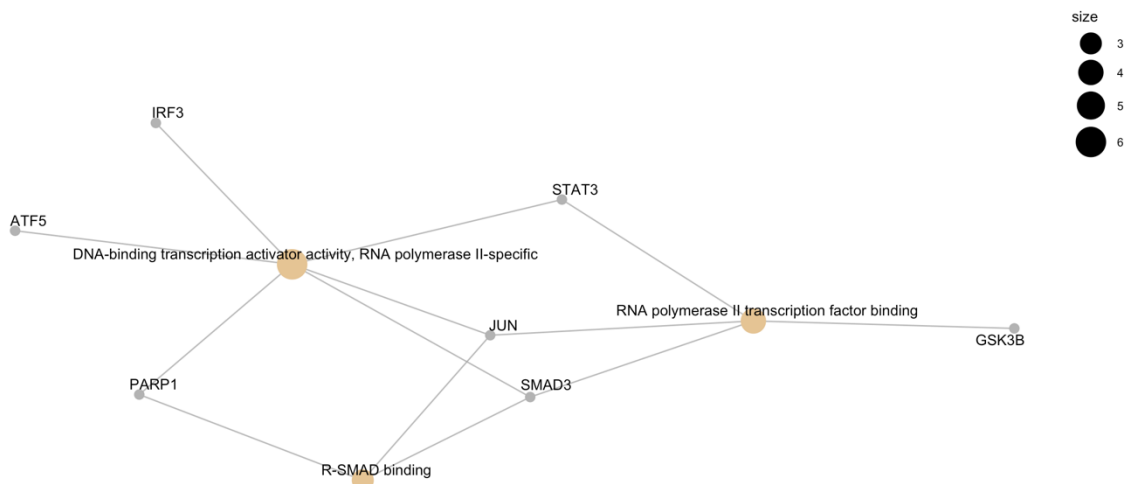

# CELLULAR COMPONENT

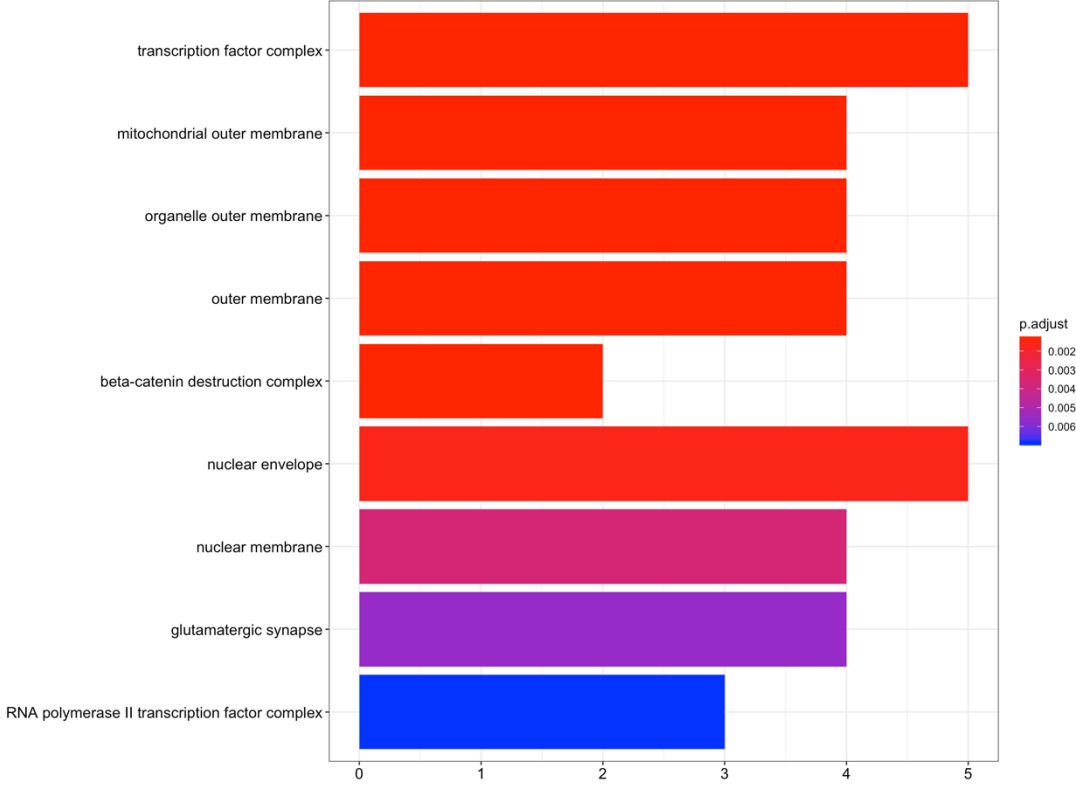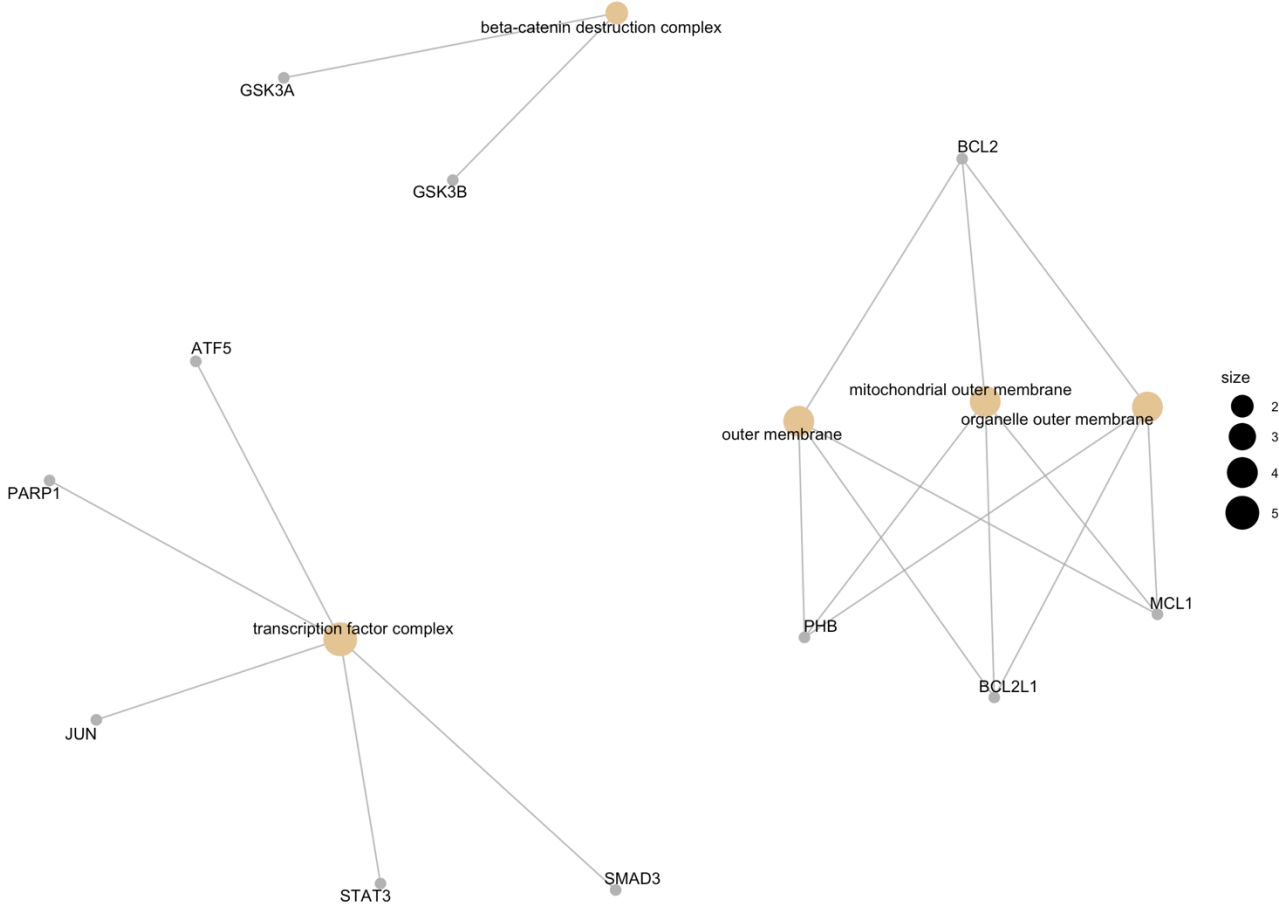



# BIOLOGICAL PROCESS

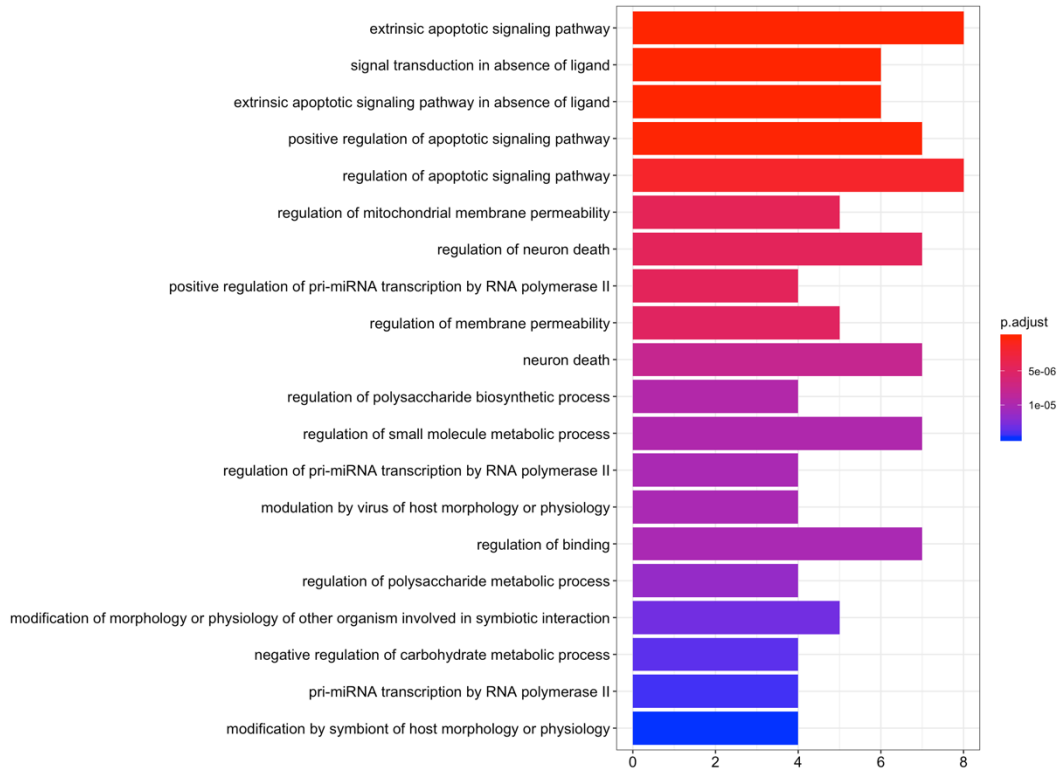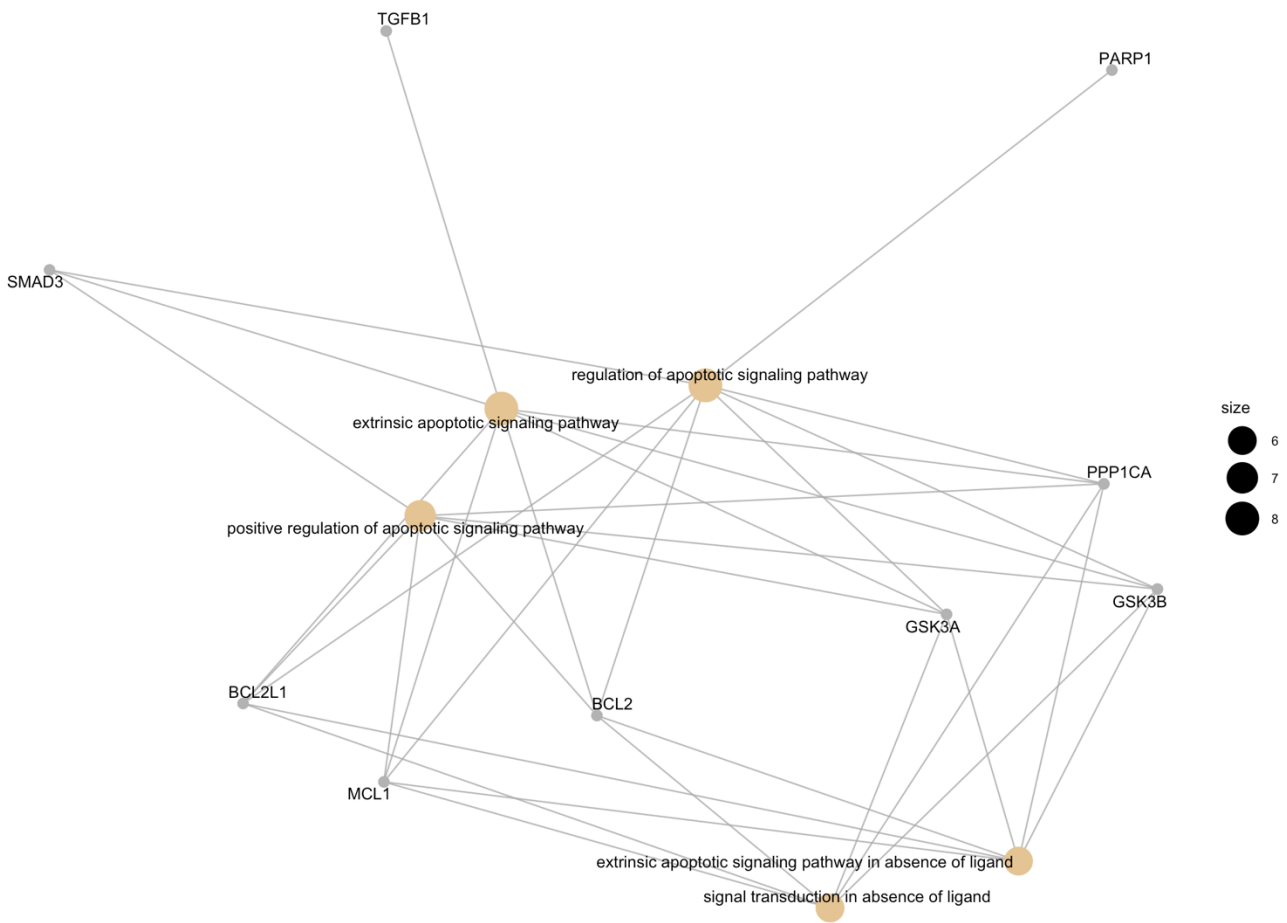

## 2.2 TABLES ENRICHMENT

### 2.2.1 MOLECULAR FUNCTION

| ID         | Description                                                              | GeneRatio | BgRatio   | p.adjust | geneID                          |
|------------|--------------------------------------------------------------------------|-----------|-----------|----------|---------------------------------|
| GO:0051400 | BH domain binding                                                        | 3/21      | 10/17632  | 0        | BCL2L1 MCL1 BCL2                |
| GO:0070513 | death domain binding                                                     | 3/21      | 10/17632  | 0        | BCL2L1 MCL1 BCL2                |
| GO:0070412 | R-SMAD binding                                                           | 3/21      | 23/17632  | 0        | JUN SMAD3 PARP1                 |
| GO:0001228 | DNA-binding transcription activator activity, RNA polymerase II-specific | 6/21      | 449/17632 | 0        | JUN STAT3 SMAD3 ATF5 IRF3 PARP1 |
| GO:0001085 | RNA polymerase II transcription factor binding                           | 4/21      | 140/17632 | 0.001    | JUN STAT3 SMAD3 GSK3B           |
| GO:0019902 | phosphatase binding                                                      | 4/21      | 178/17632 | 0.001    | STAT3 PPP1CA SMAD3 BCL2         |
| GO:0033613 | activating transcription factor binding                                  | 3/21      | 76/17632  | 0.001    | JUN SMAD3 NPM1                  |
| GO:0034236 | protein kinase A catalytic subunit binding                               | 2/21      | 13/17632  | 0.001    | GSK3A GSK3B                     |
| GO:0046332 | SMAD binding                                                             | 3/21      | 80/17632  | 0.001    | JUN SMAD3 PARP1                 |
| GO:0035259 | glucocorticoid receptor binding                                          | 2/21      | 14/17632  | 0.001    | STAT3 SMAD3                     |
| GO:0050321 | tau-protein kinase activity                                              | 2/21      | 15/17632  | 0.002    | GSK3A GSK3B                     |
| GO:0035258 | steroid hormone receptor binding                                         | 3/21      | 90/17632  | 0.002    | STAT3 SMAD3 PARP1               |
| GO:0005126 | cytokine receptor binding                                                | 4/21      | 281/17632 | 0.003    | STAT3 TGFB1 SMAD3 IL6           |
| GO:0031625 | ubiquitin protein ligase binding                                         | 4/21      | 286/17632 | 0.003    | JUN SMAD3 BCL2 GSK3B            |
| GO:0044389 | ubiquitin-like protein ligase binding                                    | 4/21      | 301/17632 | 0.003    | JUN SMAD3 BCL2 GSK3B            |
| GO:0051059 | NF-kappaB binding                                                        | 2/21      | 28/17632  | 0.004    | GSK3B NPM1                      |
| GO:0019903 | protein phosphatase binding                                              | 3/21      | 133/17632 | 0.004    | STAT3 PPP1CA BCL2               |
| GO:0035257 | nuclear hormone receptor binding                                         | 3/21      | 152/17632 | 0.005    | STAT3 SMAD3 PARP1               |
| GO:0001102 | RNA polymerase II activating transcription factor binding                | 2/21      | 44/17632  | 0.008    | JUN SMAD3                       |
| GO:0051427 | hormone receptor binding                                                 | 3/21      | 185/17632 | 0.008    | STAT3 SMAD3 PARP1               |
| GO:0051018 | protein kinase A binding                                                 | 2/21      | 48/17632  | 0.009    | GSK3A GSK3B                     |
| GO:0005160 | transforming growth factor beta receptor binding                         | 2/21      | 51/17632  | 0.009    | TGFB1 SMAD3                     |

## 2.2.2 CELLULAR COMPONENT

| ID         | Description                                    | GeneRatio | BgRatio   | p.adjust | geneID                           |
|------------|------------------------------------------------|-----------|-----------|----------|----------------------------------|
| GO:0005667 | transcription factor complex                   | 5/21      | 356/19659 | 0.001    | JUN STAT3 SMAD3 ATF5<br>PARP1    |
| GO:0005741 | mitochondrial outer membrane                   | 4/21      | 180/19659 | 0.001    | PHB BCL2L1 MCL1 BCL2             |
| GO:0031968 | organelle outer membrane                       | 4/21      | 204/19659 | 0.001    | PHB BCL2L1 MCL1 BCL2             |
| GO:0019867 | outer membrane                                 | 4/21      | 206/19659 | 0.001    | PHB BCL2L1 MCL1 BCL2             |
| GO:0030877 | beta-catenin destruction complex               | 2/21      | 12/19659  | 0.001    | GSK3A GSK3B                      |
| GO:0005635 | nuclear envelope                               | 5/21      | 461/19659 | 0.002    | KPNB1 SMAD3 BCL2L1<br>BCL2 PARP1 |
| GO:0031965 | nuclear membrane                               | 4/21      | 302/19659 | 0.004    | KPNB1 SMAD3 BCL2L1<br>BCL2       |
| GO:0098978 | glutamatergic synapse                          | 4/21      | 350/19659 | 0.006    | PHB STAT3 PPP1CA GSK3B           |
| GO:0090575 | RNA polymerase II transcription factor complex | 3/21      | 161/19659 | 0.007    | JUN STAT3 SMAD3                  |

## 2.2.3 BIOLOGICAL PROCESS

| ID         | Description                                                         | GeneRatio | BgRatio   | p.adjust | geneID                                                |
|------------|---------------------------------------------------------------------|-----------|-----------|----------|-------------------------------------------------------|
| GO:0097191 | extrinsic apoptotic signaling pathway                               | 8/20      | 224/18493 | 0        | PPP1CA TGFB1<br>SMAD3 BCL2L1 MCL1<br>BCL2 GSK3A GSK3B |
| GO:0038034 | signal transduction in absence of ligand                            | 6/20      | 71/18493  | 0        | PPP1CA BCL2L1 MCL1<br>BCL2 GSK3A GSK3B                |
| GO:0097192 | extrinsic apoptotic signaling pathway in absence of ligand          | 6/20      | 71/18493  | 0        | PPP1CA BCL2L1 MCL1<br>BCL2 GSK3A GSK3B                |
| GO:2001235 | positive regulation of apoptotic signaling pathway                  | 7/20      | 170/18493 | 0        | PPP1CA SMAD3<br>BCL2L1 MCL1 BCL2<br>GSK3A GSK3B       |
| GO:2001233 | regulation of apoptotic signaling pathway                           | 8/20      | 391/18493 | 0        | PPP1CA SMAD3<br>BCL2L1 MCL1 BCL2<br>GSK3A GSK3B PARP1 |
| GO:0046902 | regulation of mitochondrial membrane permeability                   | 5/20      | 73/18493  | 0        | STAT3 BCL2L1 BCL2<br>GSK3A GSK3B                      |
| GO:1901214 | regulation of neuron death                                          | 7/20      | 296/18493 | 0        | JUN STAT3 BCL2L1<br>MCL1 BCL2 GSK3B<br>PARP1          |
| GO:1902895 | positive regulation of pri-miRNA transcription by RNA polymerase II | 4/20      | 27/18493  | 0        | JUN STAT3 TGFB1<br>SMAD3                              |
| GO:0090559 | regulation of membrane permeability                                 | 5/20      | 81/18493  | 0        | STAT3 BCL2L1 BCL2<br>GSK3A GSK3B                      |

| ID         | Description                                                                                  | GeneRatio | BgRatio   | p.adjust | geneID                                           |
|------------|----------------------------------------------------------------------------------------------|-----------|-----------|----------|--------------------------------------------------|
| GO:0070997 | neuron death                                                                                 | 7/20      | 335/18493 | 0        | JUN STAT3 BCL2L1<br>MCL1 BCL2 GSK3B<br>PARP1     |
| GO:0032885 | regulation of polysaccharide biosynthetic process                                            | 4/20      | 35/18493  | 0        | PPP1CA TGFB1 GSK3A<br>GSK3B                      |
| GO:0062012 | regulation of small molecule metabolic process                                               | 7/20      | 355/18493 | 0        | KPNB1 STAT3 PPP1CA<br>TGFB1 GSK3A GSK3B<br>PARP1 |
| GO:1902893 | regulation of pri-miRNA transcription by RNA polymerase II                                   | 4/20      | 37/18493  | 0        | JUN STAT3 TGFB1<br>SMAD3                         |
| GO:0019048 | modulation by virus of host morphology or physiology                                         | 4/20      | 38/18493  | 0        | KPNB1 TGFB1 SMAD3<br>BCL2L1                      |
| GO:0051098 | regulation of binding                                                                        | 7/20      | 369/18493 | 0        | JUN PPP1CA TGFB1<br>SMAD3 BCL2 GSK3B<br>PARP1    |
| GO:0032881 | regulation of polysaccharide metabolic process                                               | 4/20      | 40/18493  | 0        | PPP1CA TGFB1 GSK3A<br>GSK3B                      |
| GO:0051817 | modification of morphology or physiology of other organism involved in symbiotic interaction | 5/20      | 112/18493 | 0        | KPNB1 JUN TGFB1<br>SMAD3 BCL2L1                  |
| GO:0045912 | negative regulation of carbohydrate metabolic process                                        | 4/20      | 43/18493  | 0        | STAT3 TGFB1 GSK3A<br>GSK3B                       |
| GO:0061614 | pri-miRNA transcription by RNA polymerase II                                                 | 4/20      | 44/18493  | 0        | JUN STAT3 TGFB1<br>SMAD3                         |
| GO:0044003 | modification by symbiont of host morphology or physiology                                    | 4/20      | 46/18493  | 0        | KPNB1 TGFB1 SMAD3<br>BCL2L1                      |
| GO:2001239 | regulation of extrinsic apoptotic signaling pathway in absence of ligand                     | 4/20      | 46/18493  | 0        | PPP1CA BCL2L1 MCL1<br>BCL2                       |
| GO:0008637 | apoptotic mitochondrial changes                                                              | 5/20      | 121/18493 | 0        | JUN BCL2L1 BCL2<br>GSK3A GSK3B                   |
| GO:1904951 | positive regulation of establishment of protein localization                                 | 7/20      | 437/18493 | 0        | TGFB1 SMAD3 IRF3<br>BCL2 GSK3A GSK3B<br>IL6      |
| GO:0007006 | mitochondrial membrane organization                                                          | 5/20      | 131/18493 | 0        | STAT3 BCL2L1 BCL2<br>GSK3A GSK3B                 |
| GO:0009314 | response to radiation                                                                        | 7/20      | 443/18493 | 0        | JUN PPP1CA TGFB1<br>BCL2L1 BCL2 NPM1<br>PARP1    |
| GO:0034504 | protein localization to nucleus                                                              | 6/20      | 269/18493 | 0        | KPNB1 STAT3 TGFB1<br>SMAD3 GSK3B PARP1           |
| GO:0007183 | SMAD protein complex assembly                                                                | 3/20      | 13/18493  | 0        | TGFB1 SMAD3 PARP1                                |
| GO:0009895 | negative regulation of catabolic process                                                     | 6/20      | 287/18493 | 0        | PHB STAT3 SMAD3<br>MCL1 BCL2 GSK3A               |
| GO:1901652 | response to peptide                                                                          | 7/20      | 481/18493 | 0        | STAT5A PHB STAT3<br>TGFB1 GSK3A GSK3B<br>PARP1   |
| GO:0035821 | modification of morphology or physiology of other organism                                   | 5/20      | 161/18493 | 0        | KPNB1 JUN TGFB1<br>SMAD3 BCL2L1                  |

| ID         | Description                                                        | GeneRatio | BgRatio   | p.adjust | geneID                               |
|------------|--------------------------------------------------------------------|-----------|-----------|----------|--------------------------------------|
| GO:0006109 | regulation of carbohydrate metabolic process                       | 5/20      | 162/18493 | 0        | STAT3 PPP1CA TGFB1 GSK3A GSK3B       |
| GO:1903829 | positive regulation of cellular protein localization               | 6/20      | 318/18493 | 0        | TGFB1 SMAD3 BCL2 GSK3A GSK3B PARP1   |
| GO:0060395 | SMAD protein signal transduction                                   | 4/20      | 69/18493  | 0        | JUN TGFB1 SMAD3 PARP1                |
| GO:0046677 | response to antibiotic                                             | 6/20      | 323/18493 | 0        | PHB JUN STAT3 BCL2L1 BCL2 IL6        |
| GO:0010721 | negative regulation of cell development                            | 6/20      | 326/18493 | 0        | STAT3 TGFB1 BCL2 GSK3A GSK3B IL6     |
| GO:0002363 | alpha-beta T cell lineage commitment                               | 3/20      | 19/18493  | 0        | STAT3 BCL2 IL6                       |
| GO:0000271 | polysaccharide biosynthetic process                                | 4/20      | 74/18493  | 0        | PPP1CA TGFB1 GSK3A GSK3B             |
| GO:0030308 | negative regulation of cell growth                                 | 5/20      | 184/18493 | 0        | PHB TGFB1 SMAD3 BCL2 GSK3A           |
| GO:0043369 | CD4-positive or CD8-positive, alpha-beta T cell lineage commitment | 3/20      | 21/18493  | 0        | STAT3 BCL2 IL6                       |
| GO:1901653 | cellular response to peptide                                       | 6/20      | 356/18493 | 0        | STAT5A STAT3 TGFB1 GSK3A GSK3B PARP1 |
| GO:0006913 | nucleocytoplasmic transport                                        | 6/20      | 357/18493 | 0        | KPNB1 STAT3 TGFB1 SMAD3 GSK3B NPM1   |
| GO:1901216 | positive regulation of neuron death                                | 4/20      | 81/18493  | 0        | JUN MCL1 GSK3B PARP1                 |
| GO:0051169 | nuclear transport                                                  | 6/20      | 360/18493 | 0        | KPNB1 STAT3 TGFB1 SMAD3 GSK3B NPM1   |
| GO:1901215 | negative regulation of neuron death                                | 5/20      | 201/18493 | 0        | JUN STAT3 BCL2L1 BCL2 GSK3B          |
| GO:0043523 | regulation of neuron apoptotic process                             | 5/20      | 202/18493 | 0        | JUN BCL2L1 MCL1 BCL2 PARP1           |
| GO:0048545 | response to steroid hormone                                        | 6/20      | 390/18493 | 0        | PHB TGFB1 BCL2 SKP2 PARP1 IL6        |
| GO:0043255 | regulation of carbohydrate biosynthetic process                    | 4/20      | 92/18493  | 0        | PPP1CA TGFB1 GSK3A GSK3B             |
| GO:0002360 | T cell lineage commitment                                          | 3/20      | 26/18493  | 0        | STAT3 BCL2 IL6                       |
| GO:0051222 | positive regulation of protein transport                           | 6/20      | 402/18493 | 0        | TGFB1 SMAD3 IRF3 GSK3A GSK3B IL6     |
| GO:0062014 | negative regulation of small molecule metabolic process            | 4/20      | 97/18493  | 0        | STAT3 TGFB1 GSK3A PARP1              |
| GO:0005979 | regulation of glycogen biosynthetic process                        | 3/20      | 28/18493  | 0        | PPP1CA GSK3A GSK3B                   |
| GO:0010962 | regulation of glucan biosynthetic process                          | 3/20      | 28/18493  | 0        | PPP1CA GSK3A GSK3B                   |
| GO:0001558 | regulation of cell growth                                          | 6/20      | 416/18493 | 0        | PHB TGFB1 SMAD3 BCL2 GSK3A GSK3B     |

| <b>ID</b>  | <b>Description</b>                                                                                           | <b>GeneRatio</b> | <b>BgRatio</b> | <b>p.adjust</b> | <b>geneID</b>                         |
|------------|--------------------------------------------------------------------------------------------------------------|------------------|----------------|-----------------|---------------------------------------|
| GO:0043434 | response to peptide hormone                                                                                  | 6/20             | 417/18493      | 0               | STAT5A PHB STAT3<br>TGFB1 GSK3A PARP1 |
| GO:0051402 | neuron apoptotic process                                                                                     | 5/20             | 230/18493      | 0               | JUN BCL2L1 MCL1<br>BCL2 PARP1         |
| GO:0097305 | response to alcohol                                                                                          | 5/20             | 231/18493      | 0               | PHB STAT3 TGFB1<br>BCL2L1 PARP1       |
| GO:0042391 | regulation of membrane potential                                                                             | 6/20             | 424/18493      | 0               | JUN BCL2L1 BCL2<br>GSK3A GSK3B PARP1  |
| GO:0043467 | regulation of generation of precursor metabolites and energy                                                 | 4/20             | 105/18493      | 0               | STAT3 PPP1CA GSK3A<br>GSK3B           |
| GO:0006839 | mitochondrial transport                                                                                      | 5/20             | 241/18493      | 0               | STAT3 BCL2L1 BCL2<br>GSK3A GSK3B      |
| GO:0005976 | polysaccharide metabolic process                                                                             | 4/20             | 109/18493      | 0               | PPP1CA TGFB1 GSK3A<br>GSK3B           |
| GO:0018107 | peptidyl-threonine phosphorylation                                                                           | 4/20             | 109/18493      | 0               | TGFB1 BCL2 GSK3A<br>GSK3B             |
| GO:1901030 | positive regulation of mitochondrial outer membrane permeabilization involved in apoptotic signaling pathway | 3/20             | 32/18493       | 0               | BCL2 GSK3A GSK3B                      |
| GO:0033028 | myeloid cell apoptotic process                                                                               | 3/20             | 33/18493       | 0               | IRF3 BCL2 IL6                         |
| GO:0070873 | regulation of glycogen metabolic process                                                                     | 3/20             | 33/18493       | 0               | PPP1CA GSK3A<br>GSK3B                 |
| GO:0071354 | cellular response to interleukin-6                                                                           | 3/20             | 33/18493       | 0               | PHB STAT3 IL6                         |
| GO:0018210 | peptidyl-threonine modification                                                                              | 4/20             | 116/18493      | 0               | TGFB1 BCL2 GSK3A<br>GSK3B             |
| GO:0045926 | negative regulation of growth                                                                                | 5/20             | 260/18493      | 0               | PHB TGFB1 SMAD3<br>BCL2 GSK3A         |
| GO:0043368 | positive T cell selection                                                                                    | 3/20             | 35/18493       | 0               | STAT3 BCL2 IL6                        |
| GO:1901099 | negative regulation of signal transduction in absence of ligand                                              | 3/20             | 35/18493       | 0               | BCL2L1 MCL1 BCL2                      |
| GO:2001240 | negative regulation of extrinsic apoptotic signaling pathway in absence of ligand                            | 3/20             | 35/18493       | 0               | BCL2L1 MCL1 BCL2                      |
| GO:1900180 | regulation of protein localization to nucleus                                                                | 4/20             | 121/18493      | 0               | TGFB1 SMAD3 GSK3B<br>PARP1            |
| GO:0070741 | response to interleukin-6                                                                                    | 3/20             | 37/18493       | 0               | PHB STAT3 IL6                         |
| GO:0016049 | cell growth                                                                                                  | 6/20             | 485/18493      | 0               | PHB TGFB1 SMAD3<br>BCL2 GSK3A GSK3B   |
| GO:0010677 | negative regulation of cellular carbohydrate metabolic process                                               | 3/20             | 39/18493       | 0               | STAT3 GSK3A GSK3B                     |
| GO:0035270 | endocrine system development                                                                                 | 4/20             | 128/18493      | 0               | SMAD3 GSK3A GSK3B<br>IL6              |
| GO:1901028 | regulation of mitochondrial outer membrane permeabilization involved in apoptotic signaling pathway          | 3/20             | 41/18493       | 0               | BCL2 GSK3A GSK3B                      |

| <b>ID</b>  | <b>Description</b>                                                    | <b>GeneRatio</b> | <b>BgRatio</b> | <b>p.adjust</b> | <b>geneID</b>                     |
|------------|-----------------------------------------------------------------------|------------------|----------------|-----------------|-----------------------------------|
| GO:0030522 | intracellular receptor signaling pathway                              | 5/20             | 288/18493      | 0               | PHB STAT3 IRF3 SKP2<br>PARP1      |
| GO:0034599 | cellular response to oxidative stress                                 | 5/20             | 289/18493      | 0               | JUN MCL1 BCL2<br>PARP1 IL6        |
| GO:0010675 | regulation of cellular carbohydrate metabolic process                 | 4/20             | 134/18493      | 0               | STAT3 PPP1CA GSK3A<br>GSK3B       |
| GO:0018209 | peptidyl-serine modification                                          | 5/20             | 301/18493      | 0               | TGFB1 BCL2 GSK3B<br>PARP1 IL6     |
| GO:0008631 | intrinsic apoptotic signaling pathway in response to oxidative stress | 3/20             | 45/18493       | 0               | MCL1 BCL2 PARP1                   |
| GO:0031018 | endocrine pancreas development                                        | 3/20             | 45/18493       | 0               | GSK3A GSK3B IL6                   |
| GO:0071375 | cellular response to peptide hormone stimulus                         | 5/20             | 307/18493      | 0               | STAT5A STAT3 TGFB1<br>GSK3A PARP1 |
| GO:0005978 | glycogen biosynthetic process                                         | 3/20             | 46/18493       | 0               | PPP1CA GSK3A<br>GSK3B             |
| GO:0009250 | glucan biosynthetic process                                           | 3/20             | 46/18493       | 0               | PPP1CA GSK3A<br>GSK3B             |
| GO:0010212 | response to ionizing radiation                                        | 4/20             | 146/18493      | 0               | TGFB1 BCL2L1 BCL2<br>PARP1        |
| GO:0007568 | aging                                                                 | 5/20             | 311/18493      | 0               | JUN STAT3 TGFB1<br>BCL2 NPM1      |
| GO:0035264 | multicellular organism growth                                         | 4/20             | 147/18493      | 0               | STAT5A STAT3 ATF5<br>BCL2         |
| GO:0009615 | response to virus                                                     | 5/20             | 315/18493      | 0               | IRF3 BCL2L1 BCL2<br>SKP2 IL6      |
| GO:0016202 | regulation of striated muscle tissue development                      | 4/20             | 149/18493      | 0               | TGFB1 SMAD3 BCL2<br>GSK3A         |
| GO:0043470 | regulation of carbohydrate catabolic process                          | 3/20             | 48/18493       | 0               | STAT3 PPP1CA GSK3A                |
| GO:0045058 | T cell selection                                                      | 3/20             | 48/18493       | 0               | STAT3 BCL2 IL6                    |
| GO:1901861 | regulation of muscle tissue development                               | 4/20             | 151/18493      | 0               | TGFB1 SMAD3 BCL2<br>GSK3A         |
| GO:0045599 | negative regulation of fat cell differentiation                       | 3/20             | 49/18493       | 0               | TGFB1 SMAD3 IL6                   |
| GO:0048634 | regulation of muscle organ development                                | 4/20             | 153/18493      | 0               | TGFB1 SMAD3 BCL2<br>GSK3A         |
| GO:2001236 | regulation of extrinsic apoptotic signaling pathway                   | 4/20             | 156/18493      | 0               | PPP1CA BCL2L1 MCL1<br>BCL2        |
| GO:0006606 | protein import into nucleus                                           | 4/20             | 157/18493      | 0               | KPNB1 STAT3 TGFB1<br>SMAD3        |
| GO:0097345 | mitochondrial outer membrane permeabilization                         | 3/20             | 51/18493       | 0               | BCL2 GSK3A GSK3B                  |
| GO:0090316 | positive regulation of intracellular protein transport                | 4/20             | 158/18493      | 0               | TGFB1 SMAD3 GSK3A<br>GSK3B        |

| <b>ID</b>  | <b>Description</b>                                                                       | <b>GeneRatio</b> | <b>BgRatio</b> | <b>p.adjust</b> | <b>geneID</b>                    |
|------------|------------------------------------------------------------------------------------------|------------------|----------------|-----------------|----------------------------------|
| GO:0048638 | regulation of developmental growth                                                       | 5/20             | 334/18493      | 0               | STAT5A STAT3 BCL2<br>GSK3A GSK3B |
| GO:2001242 | regulation of intrinsic apoptotic signaling pathway                                      | 4/20             | 161/18493      | 0               | BCL2L1 MCL1 BCL2<br>PARP1        |
| GO:0010332 | response to gamma radiation                                                              | 3/20             | 53/18493       | 0               | BCL2L1 BCL2 PARP1                |
| GO:0031960 | response to corticosteroid                                                               | 4/20             | 166/18493      | 0.001           | TGFB1 BCL2 PARP1<br>IL6          |
| GO:0001541 | ovarian follicle development                                                             | 3/20             | 56/18493       | 0.001           | PHB BCL2L1 BCL2                  |
| GO:0001654 | eye development                                                                          | 5/20             | 351/18493      | 0.001           | JUN STAT3 TGFB1<br>SMAD3 BCL2    |
| GO:0045862 | positive regulation of proteolysis                                                       | 5/20             | 352/18493      | 0.001           | PHB STAT3 SMAD3<br>GSK3A GSK3B   |
| GO:0150063 | visual system development                                                                | 5/20             | 352/18493      | 0.001           | JUN STAT3 TGFB1<br>SMAD3 BCL2    |
| GO:1902110 | positive regulation of mitochondrial membrane permeability involved in apoptotic process | 3/20             | 57/18493       | 0.001           | BCL2 GSK3A GSK3B                 |
| GO:2001244 | positive regulation of intrinsic apoptotic signaling pathway                             | 3/20             | 57/18493       | 0.001           | BCL2L1 MCL1 BCL2                 |
| GO:0048880 | sensory system development                                                               | 5/20             | 357/18493      | 0.001           | JUN STAT3 TGFB1<br>SMAD3 BCL2    |
| GO:0001836 | release of cytochrome c from mitochondria                                                | 3/20             | 58/18493       | 0.001           | JUN BCL2L1 BCL2                  |
| GO:1902686 | mitochondrial outer membrane permeabilization involved in programmed cell death          | 3/20             | 59/18493       | 0.001           | BCL2 GSK3A GSK3B                 |
| GO:0010821 | regulation of mitochondrion organization                                                 | 4/20             | 176/18493      | 0.001           | BCL2L1 BCL2 GSK3A<br>GSK3B       |
| GO:0051170 | import into nucleus                                                                      | 4/20             | 178/18493      | 0.001           | KPNB1 STAT3 TGFB1<br>SMAD3       |
| GO:0050678 | regulation of epithelial cell proliferation                                              | 5/20             | 368/18493      | 0.001           | STAT5A JUN STAT3<br>TGFB1 SMAD3  |
| GO:0035794 | positive regulation of mitochondrial membrane permeability                               | 3/20             | 61/18493       | 0.001           | BCL2 GSK3A GSK3B                 |
| GO:1902108 | regulation of mitochondrial membrane permeability involved in apoptotic process          | 3/20             | 63/18493       | 0.001           | BCL2 GSK3A GSK3B                 |
| GO:1905710 | positive regulation of membrane permeability                                             | 3/20             | 63/18493       | 0.001           | BCL2 GSK3A GSK3B                 |
| GO:2000377 | regulation of reactive oxygen species metabolic process                                  | 4/20             | 185/18493      | 0.001           | STAT3 TGFB1 SMAD3<br>BCL2        |
| GO:0071478 | cellular response to radiation                                                           | 4/20             | 186/18493      | 0.001           | TGFB1 BCL2L1 NPM1<br>PARP1       |
| GO:0001503 | ossification                                                                             | 5/20             | 380/18493      | 0.001           | PHB TGFB1 SMAD3<br>BCL2 IL6      |
| GO:0031099 | regeneration                                                                             | 4/20             | 188/18493      | 0.001           | PHB JUN TGFB1 BCL2               |



| <b>ID</b>  | <b>Description</b>                                                       | <b>GeneRatio</b> | <b>BgRatio</b> | <b>p.adjust</b> | <b>geneID</b>                |
|------------|--------------------------------------------------------------------------|------------------|----------------|-----------------|------------------------------|
| GO:0007179 | transforming growth factor beta receptor signaling pathway               | 4/20             | 193/18493      | 0.001           | JUN TGFB1 SMAD3 PARP1        |
| GO:0007623 | circadian rhythm                                                         | 4/20             | 193/18493      | 0.001           | JUN PPP1CA ATF5 GSK3B        |
| GO:0030278 | regulation of ossification                                               | 4/20             | 193/18493      | 0.001           | TGFB1 SMAD3 BCL2 IL6         |
| GO:0046824 | positive regulation of nucleocytoplasmic transport                       | 3/20             | 67/18493       | 0.001           | TGFB1 SMAD3 GSK3B            |
| GO:0033148 | positive regulation of intracellular estrogen receptor signaling pathway | 2/20             | 10/18493       | 0.001           | SKP2 PARP1                   |
| GO:0071104 | response to interleukin-9                                                | 2/20             | 10/18493       | 0.001           | STAT5A STAT3                 |
| GO:0033692 | cellular polysaccharide biosynthetic process                             | 3/20             | 68/18493       | 0.001           | PPP1CA GSK3A GSK3B           |
| GO:0051881 | regulation of mitochondrial membrane potential                           | 3/20             | 68/18493       | 0.001           | BCL2L1 BCL2 PARP1            |
| GO:0040014 | regulation of multicellular organism growth                              | 3/20             | 69/18493       | 0.001           | STAT5A STAT3 BCL2            |
| GO:0050679 | positive regulation of epithelial cell proliferation                     | 4/20             | 203/18493      | 0.001           | STAT5A JUN STAT3 TGFB1       |
| GO:1901201 | regulation of extracellular matrix assembly                              | 2/20             | 11/18493       | 0.001           | TGFB1 SMAD3                  |
| GO:2001020 | regulation of response to DNA damage stimulus                            | 4/20             | 206/18493      | 0.001           | BCL2L1 MCL1 BCL2 PARP1       |
| GO:0051090 | regulation of DNA-binding transcription factor activity                  | 5/20             | 412/18493      | 0.001           | JUN TGFB1 SMAD3 NPM1 IL6     |
| GO:0005977 | glycogen metabolic process                                               | 3/20             | 73/18493       | 0.001           | PPP1CA GSK3A GSK3B           |
| GO:0016051 | carbohydrate biosynthetic process                                        | 4/20             | 209/18493      | 0.001           | PPP1CA TGFB1 GSK3A GSK3B     |
| GO:0051701 | interaction with host                                                    | 4/20             | 209/18493      | 0.001           | KPNB1 TGFB1 SMAD3 BCL2L1     |
| GO:0006073 | cellular glucan metabolic process                                        | 3/20             | 74/18493       | 0.001           | PPP1CA GSK3A GSK3B           |
| GO:0010611 | regulation of cardiac muscle hypertrophy                                 | 3/20             | 74/18493       | 0.001           | SMAD3 GSK3A PARP1            |
| GO:0044042 | glucan metabolic process                                                 | 3/20             | 74/18493       | 0.001           | PPP1CA GSK3A GSK3B           |
| GO:0048762 | mesenchymal cell differentiation                                         | 4/20             | 210/18493      | 0.001           | TGFB1 SMAD3 BCL2 GSK3B       |
| GO:0050673 | epithelial cell proliferation                                            | 5/20             | 420/18493      | 0.001           | STAT5A JUN STAT3 TGFB1 SMAD3 |
| GO:0014743 | regulation of muscle hypertrophy                                         | 3/20             | 76/18493       | 0.001           | SMAD3 GSK3A PARP1            |
| GO:0060391 | positive regulation of SMAD protein signal transduction                  | 2/20             | 12/18493       | 0.001           | TGFB1 PARP1                  |
| GO:0072540 | T-helper 17 cell lineage commitment                                      | 2/20             | 12/18493       | 0.001           | STAT3 IL6                    |

| <b>ID</b>  | <b>Description</b>                                                     | <b>GeneRatio</b> | <b>BgRatio</b> | <b>p.adjust</b> | <b>geneID</b>               |
|------------|------------------------------------------------------------------------|------------------|----------------|-----------------|-----------------------------|
| GO:0017038 | protein import                                                         | 4/20             | 214/18493      | 0.001           | KPNB1 STAT3 TGFB1 SMAD3     |
| GO:0032388 | positive regulation of intracellular transport                         | 4/20             | 214/18493      | 0.001           | TGFB1 SMAD3 GSK3A GSK3B     |
| GO:0031016 | pancreas development                                                   | 3/20             | 77/18493       | 0.001           | GSK3A GSK3B IL6             |
| GO:0045444 | fat cell differentiation                                               | 4/20             | 217/18493      | 0.001           | TGFB1 SMAD3 ATF5 IL6        |
| GO:1900182 | positive regulation of protein localization to nucleus                 | 3/20             | 78/18493       | 0.001           | TGFB1 SMAD3 PARP1           |
| GO:0048732 | gland development                                                      | 5/20             | 434/18493      | 0.001           | STAT5A JUN TGFB1 SMAD3 BCL2 |
| GO:0030279 | negative regulation of ossification                                    | 3/20             | 79/18493       | 0.001           | TGFB1 SMAD3 BCL2            |
| GO:0033143 | regulation of intracellular steroid hormone receptor signaling pathway | 3/20             | 79/18493       | 0.001           | PHB SKP2 PARP1              |
| GO:0035723 | interleukin-15-mediated signaling pathway                              | 2/20             | 13/18493       | 0.001           | STAT5A STAT3                |
| GO:0060397 | JAK-STAT cascade involved in growth hormone signaling pathway          | 2/20             | 13/18493       | 0.001           | STAT5A STAT3                |
| GO:0071350 | cellular response to interleukin-15                                    | 2/20             | 13/18493       | 0.001           | STAT5A STAT3                |
| GO:0006979 | response to oxidative stress                                           | 5/20             | 441/18493      | 0.001           | JUN MCL1 BCL2 PARP1 IL6     |
| GO:0051607 | defense response to virus                                              | 4/20             | 228/18493      | 0.001           | IRF3 BCL2 SKP2 IL6          |
| GO:0042326 | negative regulation of phosphorylation                                 | 5/20             | 448/18493      | 0.001           | PHB JUN STAT3 TGFB1 NPM1    |
| GO:0034637 | cellular carbohydrate biosynthetic process                             | 3/20             | 83/18493       | 0.001           | PPP1CA GSK3A GSK3B          |
| GO:0071216 | cellular response to biotic stimulus                                   | 4/20             | 229/18493      | 0.001           | TGFB1 IRF3 GSK3B IL6        |
| GO:0042110 | T cell activation                                                      | 5/20             | 451/18493      | 0.001           | STAT3 TGFB1 SMAD3 BCL2 IL6  |
| GO:0045778 | positive regulation of ossification                                    | 3/20             | 84/18493       | 0.001           | TGFB1 SMAD3 IL6             |
| GO:0034248 | regulation of cellular amide metabolic process                         | 5/20             | 453/18493      | 0.001           | STAT3 PPP1CA GSK3A NPM1 IL6 |
| GO:0033157 | regulation of intracellular protein transport                          | 4/20             | 232/18493      | 0.001           | TGFB1 SMAD3 GSK3A GSK3B     |
| GO:0043558 | regulation of translational initiation in response to stress           | 2/20             | 14/18493       | 0.001           | PPP1CA NPM1                 |
| GO:0070672 | response to interleukin-15                                             | 2/20             | 14/18493       | 0.001           | STAT5A STAT3                |
| GO:0030217 | T cell differentiation                                                 | 4/20             | 234/18493      | 0.001           | STAT3 TGFB1 BCL2 IL6        |
| GO:0033002 | muscle cell proliferation                                              | 4/20             | 236/18493      | 0.001           | JUN STAT3 SKP2 IL6          |

| <b>ID</b>  | <b>Description</b>                                                              | <b>GeneRatio</b> | <b>BgRatio</b> | <b>p.adjust</b> | <b>geneID</b>                    |
|------------|---------------------------------------------------------------------------------|------------------|----------------|-----------------|----------------------------------|
| GO:0060828 | regulation of canonical Wnt signaling pathway                                   | 4/20             | 236/18493      | 0.001           | PPP1CA SMAD3<br>GSK3A GSK3B      |
| GO:0006112 | energy reserve metabolic process                                                | 3/20             | 87/18493       | 0.001           | PPP1CA GSK3A<br>GSK3B            |
| GO:0001776 | leukocyte homeostasis                                                           | 3/20             | 88/18493       | 0.001           | TGFB1 BCL2 IL6                   |
| GO:0033689 | negative regulation of osteoblast proliferation                                 | 2/20             | 15/18493       | 0.001           | SMAD3 BCL2                       |
| GO:2001170 | negative regulation of ATP biosynthetic process                                 | 2/20             | 15/18493       | 0.001           | STAT3 PARP1                      |
| GO:0071560 | cellular response to transforming growth factor beta stimulus                   | 4/20             | 242/18493      | 0.001           | JUN TGFB1 SMAD3<br>PARP1         |
| GO:0051899 | membrane depolarization                                                         | 3/20             | 90/18493       | 0.001           | JUN BCL2 PARP1                   |
| GO:0031330 | negative regulation of cellular catabolic process                               | 4/20             | 245/18493      | 0.001           | STAT3 MCL1 BCL2<br>GSK3A         |
| GO:0016311 | dephosphorylation                                                               | 5/20             | 475/18493      | 0.001           | PPP1CA TGFB1<br>SMAD3 BCL2 GSK3B |
| GO:0045639 | positive regulation of myeloid cell differentiation                             | 3/20             | 91/18493       | 0.001           | JUN STAT3 TGFB1                  |
| GO:0048872 | homeostasis of number of cells                                                  | 4/20             | 248/18493      | 0.001           | STAT3 TGFB1 BCL2<br>IL6          |
| GO:0071559 | response to transforming growth factor beta                                     | 4/20             | 249/18493      | 0.001           | JUN TGFB1 SMAD3<br>PARP1         |
| GO:0036473 | cell death in response to oxidative stress                                      | 3/20             | 93/18493       | 0.001           | MCL1 BCL2 PARP1                  |
| GO:0002295 | T-helper cell lineage commitment                                                | 2/20             | 16/18493       | 0.001           | STAT3 IL6                        |
| GO:0003007 | heart morphogenesis                                                             | 4/20             | 253/18493      | 0.002           | JUN TGFB1 SMAD3<br>GSK3A         |
| GO:0051091 | positive regulation of DNA-binding transcription factor activity                | 4/20             | 255/18493      | 0.002           | TGFB1 SMAD3 NPM1<br>IL6          |
| GO:0001657 | ureteric bud development                                                        | 3/20             | 96/18493       | 0.002           | TGFB1 SMAD3 BCL2                 |
| GO:2001243 | negative regulation of intrinsic apoptotic signaling pathway                    | 3/20             | 96/18493       | 0.002           | BCL2L1 MCL1 BCL2                 |
| GO:0045165 | cell fate commitment                                                            | 4/20             | 257/18493      | 0.002           | STAT3 MCL1 BCL2 IL6              |
| GO:0072163 | mesonephric epithelium development                                              | 3/20             | 97/18493       | 0.002           | TGFB1 SMAD3 BCL2                 |
| GO:0072164 | mesonephric tubule development                                                  | 3/20             | 97/18493       | 0.002           | TGFB1 SMAD3 BCL2                 |
| GO:0030809 | negative regulation of nucleotide biosynthetic process                          | 2/20             | 17/18493       | 0.002           | STAT3 PARP1                      |
| GO:0033145 | positive regulation of intracellular steroid hormone receptor signaling pathway | 2/20             | 17/18493       | 0.002           | SKP2 PARP1                       |
| GO:0043373 | CD4-positive, alpha-beta T cell lineage commitment                              | 2/20             | 17/18493       | 0.002           | STAT3 IL6                        |
| GO:0070102 | interleukin-6-mediated signaling pathway                                        | 2/20             | 17/18493       | 0.002           | STAT3 IL6                        |
| GO:1900372 | negative regulation of purine nucleotide biosynthetic process                   | 2/20             | 17/18493       | 0.002           | STAT3 PARP1                      |

| ID         | Description                                                     | GeneRatio | BgRatio   | p.adjust | geneID                      |
|------------|-----------------------------------------------------------------|-----------|-----------|----------|-----------------------------|
| GO:2000811 | negative regulation of anoikis                                  | 2/20      | 17/18493  | 0.002    | MCL1 BCL2                   |
| GO:0031334 | positive regulation of protein complex assembly                 | 4/20      | 259/18493 | 0.002    | JUN TGFB1 GSK3B<br>PARP1    |
| GO:0071383 | cellular response to steroid hormone stimulus                   | 4/20      | 259/18493 | 0.002    | PHB TGFB1 SKP2<br>PARP1     |
| GO:0008585 | female gonad development                                        | 3/20      | 98/18493  | 0.002    | PHB BCL2L1 BCL2             |
| GO:0048661 | positive regulation of smooth muscle cell proliferation         | 3/20      | 98/18493  | 0.002    | JUN SKP2 IL6                |
| GO:0044264 | cellular polysaccharide metabolic process                       | 3/20      | 99/18493  | 0.002    | PPP1CA GSK3A<br>GSK3B       |
| GO:0034976 | response to endoplasmic reticulum stress                        | 4/20      | 264/18493 | 0.002    | JUN BCL2 GSK3A<br>GSK3B     |
| GO:0043555 | regulation of translation in response to stress                 | 2/20      | 18/18493  | 0.002    | PPP1CA NPM1                 |
| GO:0001823 | mesonephros development                                         | 3/20      | 101/18493 | 0.002    | TGFB1 SMAD3 BCL2            |
| GO:0046632 | alpha-beta T cell differentiation                               | 3/20      | 101/18493 | 0.002    | STAT3 BCL2 IL6              |
| GO:0008630 | intrinsic apoptotic signaling pathway in response to DNA damage | 3/20      | 102/18493 | 0.002    | BCL2L1 MCL1 BCL2            |
| GO:0060485 | mesenchyme development                                          | 4/20      | 269/18493 | 0.002    | TGFB1 SMAD3 BCL2<br>GSK3B   |
| GO:0033138 | positive regulation of peptidyl-serine phosphorylation          | 3/20      | 103/18493 | 0.002    | TGFB1 BCL2 IL6              |
| GO:0046545 | development of primary female sexual characteristics            | 3/20      | 103/18493 | 0.002    | PHB BCL2L1 BCL2             |
| GO:2001237 | negative regulation of extrinsic apoptotic signaling pathway    | 3/20      | 104/18493 | 0.002    | BCL2L1 MCL1 BCL2            |
| GO:0010523 | negative regulation of calcium ion transport into cytosol       | 2/20      | 19/18493  | 0.002    | TGFB1 BCL2                  |
| GO:0043502 | regulation of muscle adaptation                                 | 3/20      | 106/18493 | 0.002    | SMAD3 GSK3A PARP1           |
| GO:0048511 | rhythmic process                                                | 4/20      | 276/18493 | 0.002    | JUN PPP1CA ATF5<br>GSK3B    |
| GO:0072593 | reactive oxygen species metabolic process                       | 4/20      | 276/18493 | 0.002    | STAT3 TGFB1 SMAD3<br>BCL2   |
| GO:0003300 | cardiac muscle hypertrophy                                      | 3/20      | 107/18493 | 0.002    | SMAD3 GSK3A PARP1           |
| GO:0044262 | cellular carbohydrate metabolic process                         | 4/20      | 278/18493 | 0.002    | STAT3 PPP1CA GSK3A<br>GSK3B |
| GO:0050768 | negative regulation of neurogenesis                             | 4/20      | 279/18493 | 0.002    | STAT3 TGFB1 GSK3B<br>IL6    |
| GO:0045930 | negative regulation of mitotic cell cycle                       | 4/20      | 281/18493 | 0.002    | TGFB1 SMAD3<br>BCL2L1 BCL2  |
| GO:0003323 | type B pancreatic cell development                              | 2/20      | 20/18493  | 0.002    | GSK3A GSK3B                 |
| GO:0023019 | signal transduction involved in regulation of gene expression   | 2/20      | 20/18493  | 0.002    | SMAD3 PARP1                 |

| <b>ID</b>  | <b>Description</b>                                             | <b>GeneRatio</b> | <b>BgRatio</b> | <b>p.adjust</b> | <b>geneID</b>            |
|------------|----------------------------------------------------------------|------------------|----------------|-----------------|--------------------------|
| GO:1903055 | positive regulation of extracellular matrix organization       | 2/20             | 20/18493       | 0.002           | TGFB1 SMAD3              |
| GO:0014897 | striated muscle hypertrophy                                    | 3/20             | 109/18493      | 0.002           | SMAD3 GSK3A PARP1        |
| GO:0018105 | peptidyl-serine phosphorylation                                | 4/20             | 282/18493      | 0.002           | TGFB1 BCL2 GSK3B IL6     |
| GO:0060070 | canonical Wnt signaling pathway                                | 4/20             | 284/18493      | 0.002           | PPP1CA SMAD3 GSK3A GSK3B |
| GO:0010906 | regulation of glucose metabolic process                        | 3/20             | 111/18493      | 0.002           | PPP1CA GSK3A GSK3B       |
| GO:0014896 | muscle hypertrophy                                             | 3/20             | 111/18493      | 0.002           | SMAD3 GSK3A PARP1        |
| GO:1903828 | negative regulation of cellular protein localization           | 3/20             | 111/18493      | 0.002           | TGFB1 BCL2L1 GSK3B       |
| GO:0097193 | intrinsic apoptotic signaling pathway                          | 4/20             | 287/18493      | 0.002           | BCL2L1 MCL1 BCL2 PARP1   |
| GO:0001938 | positive regulation of endothelial cell proliferation          | 3/20             | 112/18493      | 0.002           | STAT5A JUN STAT3         |
| GO:0010822 | positive regulation of mitochondrion organization              | 3/20             | 112/18493      | 0.002           | BCL2 GSK3A GSK3B         |
| GO:0046822 | regulation of nucleocytoplasmic transport                      | 3/20             | 112/18493      | 0.002           | TGFB1 SMAD3 GSK3B        |
| GO:0051900 | regulation of mitochondrial depolarization                     | 2/20             | 21/18493       | 0.002           | BCL2 PARP1               |
| GO:0060390 | regulation of SMAD protein signal transduction                 | 2/20             | 21/18493       | 0.002           | TGFB1 PARP1              |
| GO:0071359 | cellular response to dsRNA                                     | 2/20             | 21/18493       | 0.002           | IRF3 NPM1                |
| GO:1904886 | beta-catenin destruction complex disassembly                   | 2/20             | 21/18493       | 0.002           | PPP1CA GSK3B             |
| GO:0051153 | regulation of striated muscle cell differentiation             | 3/20             | 113/18493      | 0.002           | TGFB1 BCL2 GSK3A         |
| GO:0006925 | inflammatory cell apoptotic process                            | 2/20             | 22/18493       | 0.002           | IRF3 IL6                 |
| GO:1903077 | negative regulation of protein localization to plasma membrane | 2/20             | 22/18493       | 0.002           | TGFB1 BCL2L1             |
| GO:2000637 | positive regulation of gene silencing by miRNA                 | 2/20             | 22/18493       | 0.002           | STAT3 TGFB1              |
| GO:0006754 | ATP biosynthetic process                                       | 3/20             | 116/18493      | 0.002           | STAT3 TGFB1 PARP1        |
| GO:0001952 | regulation of cell-matrix adhesion                             | 3/20             | 117/18493      | 0.002           | SMAD3 BCL2 GSK3B         |
| GO:0051961 | negative regulation of nervous system development              | 4/20             | 298/18493      | 0.002           | STAT3 TGFB1 GSK3B IL6    |
| GO:0046660 | female sex differentiation                                     | 3/20             | 118/18493      | 0.002           | PHB BCL2L1 BCL2          |
| GO:0051882 | mitochondrial depolarization                                   | 2/20             | 23/18493       | 0.002           | BCL2 PARP1               |
| GO:0060148 | positive regulation of posttranscriptional gene silencing      | 2/20             | 23/18493       | 0.002           | STAT3 TGFB1              |
| GO:0060396 | growth hormone receptor signaling pathway                      | 2/20             | 23/18493       | 0.002           | STAT5A STAT3             |
| GO:1903579 | negative regulation of ATP metabolic process                   | 2/20             | 23/18493       | 0.002           | STAT3 PARP1              |

| <b>ID</b>  | <b>Description</b>                                                 | <b>GeneRatio</b> | <b>BgRatio</b> | <b>p.adjust</b> | <b>geneID</b>            |
|------------|--------------------------------------------------------------------|------------------|----------------|-----------------|--------------------------|
| GO:0010506 | regulation of autophagy                                            | 4/20             | 303/18493      | 0.002           | TFEB MCL1 BCL2 GSK3A     |
| GO:0043500 | muscle adaptation                                                  | 3/20             | 120/18493      | 0.002           | SMAD3 GSK3A PARP1        |
| GO:0051101 | regulation of DNA binding                                          | 3/20             | 122/18493      | 0.002           | JUN TGFB1 PARP1          |
| GO:0009416 | response to light stimulus                                         | 4/20             | 308/18493      | 0.002           | PPP1CA BCL2 NPM1 PARP1   |
| GO:0071378 | cellular response to growth hormone stimulus                       | 2/20             | 24/18493       | 0.002           | STAT5A STAT3             |
| GO:1903203 | regulation of oxidative stress-induced neuron death                | 2/20             | 24/18493       | 0.002           | MCL1 PARP1               |
| GO:1904376 | negative regulation of protein localization to cell periphery      | 2/20             | 24/18493       | 0.002           | TGFB1 BCL2L1             |
| GO:2000209 | regulation of anoikis                                              | 2/20             | 24/18493       | 0.002           | MCL1 BCL2                |
| GO:2000679 | positive regulation of transcription regulatory region DNA binding | 2/20             | 24/18493       | 0.002           | TGFB1 PARP1              |
| GO:0030111 | regulation of Wnt signaling pathway                                | 4/20             | 311/18493      | 0.002           | PPP1CA SMAD3 GSK3A GSK3B |
| GO:0060562 | epithelial tube morphogenesis                                      | 4/20             | 313/18493      | 0.003           | PPP1CA TGFB1 SMAD3 BCL2  |
| GO:0002068 | glandular epithelial cell development                              | 2/20             | 25/18493       | 0.003           | GSK3A GSK3B              |
| GO:0003309 | type B pancreatic cell differentiation                             | 2/20             | 25/18493       | 0.003           | GSK3A GSK3B              |
| GO:0019054 | modulation by virus of host process                                | 2/20             | 25/18493       | 0.003           | KPNB1 BCL2L1             |
| GO:0036475 | neuron death in response to oxidative stress                       | 2/20             | 25/18493       | 0.003           | MCL1 PARP1               |
| GO:0085029 | extracellular matrix assembly                                      | 2/20             | 25/18493       | 0.003           | TGFB1 SMAD3              |
| GO:1900543 | negative regulation of purine nucleotide metabolic process         | 2/20             | 25/18493       | 0.003           | STAT3 PARP1              |
| GO:0009206 | purine ribonucleoside triphosphate biosynthetic process            | 3/20             | 127/18493      | 0.003           | STAT3 TGFB1 PARP1        |
| GO:0006470 | protein dephosphorylation                                          | 4/20             | 318/18493      | 0.003           | PPP1CA TGFB1 BCL2 GSK3B  |
| GO:0071214 | cellular response to abiotic stimulus                              | 4/20             | 319/18493      | 0.003           | TGFB1 BCL2L1 NPM1 PARP1  |
| GO:0104004 | cellular response to environmental stimulus                        | 4/20             | 319/18493      | 0.003           | TGFB1 BCL2L1 NPM1 PARP1  |
| GO:0009145 | purine nucleoside triphosphate biosynthetic process                | 3/20             | 128/18493      | 0.003           | STAT3 TGFB1 PARP1        |
| GO:0045598 | regulation of fat cell differentiation                             | 3/20             | 128/18493      | 0.003           | TGFB1 SMAD3 IL6          |
| GO:0050921 | positive regulation of chemotaxis                                  | 3/20             | 130/18493      | 0.003           | TGFB1 SMAD3 IL6          |
| GO:0045980 | negative regulation of nucleotide metabolic process                | 2/20             | 26/18493       | 0.003           | STAT3 PARP1              |
| GO:0072539 | T-helper 17 cell differentiation                                   | 2/20             | 26/18493       | 0.003           | STAT3 IL6                |

| <b>ID</b>  | <b>Description</b>                                                           | <b>GeneRatio</b> | <b>BgRatio</b> | <b>p.adjust</b> | <b>geneID</b>         |
|------------|------------------------------------------------------------------------------|------------------|----------------|-----------------|-----------------------|
| GO:0032496 | response to lipopolysaccharide                                               | 4/20             | 324/18493      | 0.003           | JUN TGFB1 IRF3 IL6    |
| GO:0048565 | digestive tract development                                                  | 3/20             | 131/18493      | 0.003           | TGFB1 SMAD3 BCL2      |
| GO:0071496 | cellular response to external stimulus                                       | 4/20             | 328/18493      | 0.003           | JUN TGFB1 BCL2 SKP2   |
| GO:0009201 | ribonucleoside triphosphate biosynthetic process                             | 3/20             | 133/18493      | 0.003           | STAT3 TGFB1 PARP1     |
| GO:0035883 | enteroendocrine cell differentiation                                         | 2/20             | 27/18493       | 0.003           | GSK3A GSK3B           |
| GO:0035902 | response to immobilization stress                                            | 2/20             | 27/18493       | 0.003           | PHB TGFB1             |
| GO:0046631 | alpha-beta T cell activation                                                 | 3/20             | 134/18493      | 0.003           | STAT3 BCL2 IL6        |
| GO:0001837 | epithelial to mesenchymal transition                                         | 3/20             | 135/18493      | 0.003           | TGFB1 SMAD3 GSK3B     |
| GO:0033135 | regulation of peptidyl-serine phosphorylation                                | 3/20             | 135/18493      | 0.003           | TGFB1 BCL2 IL6        |
| GO:0009411 | response to UV                                                               | 3/20             | 136/18493      | 0.003           | BCL2 NPM1 PARP1       |
| GO:0033688 | regulation of osteoblast proliferation                                       | 2/20             | 28/18493       | 0.003           | SMAD3 BCL2            |
| GO:0072538 | T-helper 17 type immune response                                             | 2/20             | 28/18493       | 0.003           | STAT3 IL6             |
| GO:1904646 | cellular response to amyloid-beta                                            | 2/20             | 28/18493       | 0.003           | GSK3B PARP1           |
| GO:0001889 | liver development                                                            | 3/20             | 137/18493      | 0.003           | JUN TGFB1 SMAD3       |
| GO:0002237 | response to molecule of bacterial origin                                     | 4/20             | 337/18493      | 0.003           | JUN TGFB1 IRF3 IL6    |
| GO:0007178 | transmembrane receptor protein serine/threonine kinase signaling pathway     | 4/20             | 340/18493      | 0.003           | JUN TGFB1 SMAD3 PARP1 |
| GO:0034250 | positive regulation of cellular amide metabolic process                      | 3/20             | 140/18493      | 0.003           | GSK3A NPM1 IL6        |
| GO:0061008 | hepaticobiliary system development                                           | 3/20             | 140/18493      | 0.003           | JUN TGFB1 SMAD3       |
| GO:0072073 | kidney epithelium development                                                | 3/20             | 140/18493      | 0.003           | TGFB1 SMAD3 BCL2      |
| GO:0044068 | modulation by symbiont of host cellular process                              | 2/20             | 29/18493       | 0.003           | KPNB1 BCL2L1          |
| GO:0070306 | lens fiber cell differentiation                                              | 2/20             | 29/18493       | 0.003           | TGFB1 SMAD3           |
| GO:1902175 | regulation of oxidative stress-induced intrinsic apoptotic signaling pathway | 2/20             | 29/18493       | 0.003           | MCL1 PARP1            |
| GO:0009127 | purine nucleoside monophosphate biosynthetic process                         | 3/20             | 141/18493      | 0.003           | STAT3 TGFB1 PARP1     |
| GO:0009168 | purine ribonucleoside monophosphate biosynthetic process                     | 3/20             | 141/18493      | 0.003           | STAT3 TGFB1 PARP1     |
| GO:0042542 | response to hydrogen peroxide                                                | 3/20             | 141/18493      | 0.003           | JUN BCL2 IL6          |
| GO:0030098 | lymphocyte differentiation                                                   | 4/20             | 344/18493      | 0.003           | STAT3 TGFB1 BCL2 IL6  |
| GO:0030518 | intracellular steroid hormone receptor signaling pathway                     | 3/20             | 142/18493      | 0.003           | PHB SKP2 PARP1        |
| GO:0055123 | digestive system development                                                 | 3/20             | 143/18493      | 0.003           | TGFB1 SMAD3 BCL2      |

| <b>ID</b>  | <b>Description</b>                                                                     | <b>GeneRatio</b> | <b>BgRatio</b> | <b>p.adjust</b> | <b>geneID</b>          |
|------------|----------------------------------------------------------------------------------------|------------------|----------------|-----------------|------------------------|
| GO:0038111 | interleukin-7-mediated signaling pathway                                               | 2/20             | 30/18493       | 0.003           | STAT5A STAT3           |
| GO:1905476 | negative regulation of protein localization to membrane                                | 2/20             | 30/18493       | 0.003           | TGFB1 BCL2L1           |
| GO:0006959 | humoral immune response                                                                | 4/20             | 349/18493      | 0.003           | TFEB PHB BCL2 IL6      |
| GO:0050871 | positive regulation of B cell activation                                               | 3/20             | 144/18493      | 0.003           | TGFB1 BCL2 IL6         |
| GO:0009142 | nucleoside triphosphate biosynthetic process                                           | 3/20             | 145/18493      | 0.003           | STAT3 TGFB1 PARP1      |
| GO:0033687 | osteoblast proliferation                                                               | 2/20             | 31/18493       | 0.003           | SMAD3 BCL2             |
| GO:0045745 | positive regulation of G protein-coupled receptor signaling pathway                    | 2/20             | 31/18493       | 0.003           | PHB GSK3A              |
| GO:0098760 | response to interleukin-7                                                              | 2/20             | 31/18493       | 0.003           | STAT5A STAT3           |
| GO:0098761 | cellular response to interleukin-7                                                     | 2/20             | 31/18493       | 0.003           | STAT5A STAT3           |
| GO:1902230 | negative regulation of intrinsic apoptotic signaling pathway in response to DNA damage | 2/20             | 31/18493       | 0.003           | BCL2L1 BCL2            |
| GO:1904645 | response to amyloid-beta                                                               | 2/20             | 31/18493       | 0.003           | GSK3B PARP1            |
| GO:0007259 | JAK-STAT cascade                                                                       | 3/20             | 147/18493      | 0.003           | STAT5A STAT3 IL6       |
| GO:0043524 | negative regulation of neuron apoptotic process                                        | 3/20             | 147/18493      | 0.003           | JUN BCL2L1 BCL2        |
| GO:0010038 | response to metal ion                                                                  | 4/20             | 358/18493      | 0.003           | JUN PPP1CA BCL2 PARP1  |
| GO:0051384 | response to glucocorticoid                                                             | 3/20             | 149/18493      | 0.003           | TGFB1 BCL2 IL6         |
| GO:0048754 | branching morphogenesis of an epithelial tube                                          | 3/20             | 150/18493      | 0.004           | PPP1CA TGFB1 BCL2      |
| GO:0010574 | regulation of vascular endothelial growth factor production                            | 2/20             | 32/18493       | 0.004           | TGFB1 IL6              |
| GO:0097696 | STAT cascade                                                                           | 3/20             | 151/18493      | 0.004           | STAT5A STAT3 IL6       |
| GO:0016052 | carbohydrate catabolic process                                                         | 3/20             | 152/18493      | 0.004           | STAT3 PPP1CA GSK3A     |
| GO:0009156 | ribonucleoside monophosphate biosynthetic process                                      | 3/20             | 155/18493      | 0.004           | STAT3 TGFB1 PARP1      |
| GO:0010573 | vascular endothelial growth factor production                                          | 2/20             | 34/18493       | 0.004           | TGFB1 IL6              |
| GO:0043276 | anoikis                                                                                | 2/20             | 34/18493       | 0.004           | MCL1 BCL2              |
| GO:0042176 | regulation of protein catabolic process                                                | 4/20             | 375/18493      | 0.004           | PHB SMAD3 GSK3A GSK3B  |
| GO:0010614 | negative regulation of cardiac muscle hypertrophy                                      | 2/20             | 35/18493       | 0.004           | SMAD3 GSK3A            |
| GO:0030501 | positive regulation of bone mineralization                                             | 2/20             | 35/18493       | 0.004           | TGFB1 SMAD3            |
| GO:0014706 | striated muscle tissue development                                                     | 4/20             | 379/18493      | 0.004           | TGFB1 SMAD3 BCL2 GSK3A |
| GO:0060416 | response to growth hormone                                                             | 2/20             | 36/18493       | 0.004           | STAT5A STAT3           |



| <b>ID</b>  | <b>Description</b>                                                            | <b>GeneRatio</b> | <b>BgRatio</b> | <b>p.adjust</b> | <b>geneID</b>          |
|------------|-------------------------------------------------------------------------------|------------------|----------------|-----------------|------------------------|
| GO:0018108 | peptidyl-tyrosine phosphorylation                                             | 4/20             | 387/18493      | 0.004           | STAT5A STAT3 TGFB1 IL6 |
| GO:0010634 | positive regulation of epithelial cell migration                              | 3/20             | 165/18493      | 0.004           | STAT5A JUN TGFB1       |
| GO:0051100 | negative regulation of binding                                                | 3/20             | 165/18493      | 0.004           | JUN PPP1CA GSK3B       |
| GO:0018212 | peptidyl-tyrosine modification                                                | 4/20             | 390/18493      | 0.004           | STAT5A STAT3 TGFB1 IL6 |
| GO:0014741 | negative regulation of muscle hypertrophy                                     | 2/20             | 37/18493       | 0.004           | SMAD3 GSK3A            |
| GO:0009124 | nucleoside monophosphate biosynthetic process                                 | 3/20             | 167/18493      | 0.005           | STAT3 TGFB1 PARP1      |
| GO:0048660 | regulation of smooth muscle cell proliferation                                | 3/20             | 168/18493      | 0.005           | JUN SKP2 IL6           |
| GO:0060537 | muscle tissue development                                                     | 4/20             | 395/18493      | 0.005           | TGFB1 SMAD3 BCL2 GSK3A |
| GO:0000060 | protein import into nucleus, translocation                                    | 2/20             | 38/18493       | 0.005           | KPNB1 TGFB1            |
| GO:0045785 | positive regulation of cell adhesion                                          | 4/20             | 397/18493      | 0.005           | TGFB1 SMAD3 GSK3B IL6  |
| GO:0048659 | smooth muscle cell proliferation                                              | 3/20             | 170/18493      | 0.005           | JUN SKP2 IL6           |
| GO:0033146 | regulation of intracellular estrogen receptor signaling pathway               | 2/20             | 39/18493       | 0.005           | SKP2 PARP1             |
| GO:0043029 | T cell homeostasis                                                            | 2/20             | 39/18493       | 0.005           | TGFB1 BCL2             |
| GO:1902229 | regulation of intrinsic apoptotic signaling pathway in response to DNA damage | 2/20             | 39/18493       | 0.005           | BCL2L1 BCL2            |
| GO:1903053 | regulation of extracellular matrix organization                               | 2/20             | 39/18493       | 0.005           | TGFB1 SMAD3            |
| GO:0006417 | regulation of translation                                                     | 4/20             | 402/18493      | 0.005           | STAT3 PPP1CA NPM1 IL6  |
| GO:0007517 | muscle organ development                                                      | 4/20             | 403/18493      | 0.005           | TGFB1 SMAD3 BCL2 GSK3A |
| GO:0002285 | lymphocyte activation involved in immune response                             | 3/20             | 174/18493      | 0.005           | STAT3 TGFB1 IL6        |
| GO:0030099 | myeloid cell differentiation                                                  | 4/20             | 405/18493      | 0.005           | JUN STAT3 TGFB1 PARP1  |
| GO:0001936 | regulation of endothelial cell proliferation                                  | 3/20             | 175/18493      | 0.005           | STAT5A JUN STAT3       |
| GO:0070507 | regulation of microtubule cytoskeleton organization                           | 3/20             | 175/18493      | 0.005           | ATF5 GSK3B NPM1        |
| GO:0030225 | macrophage differentiation                                                    | 2/20             | 40/18493       | 0.005           | TGFB1 PARP1            |
| GO:0044275 | cellular carbohydrate catabolic process                                       | 2/20             | 40/18493       | 0.005           | PPP1CA GSK3A           |
| GO:0001933 | negative regulation of protein phosphorylation                                | 4/20             | 408/18493      | 0.005           | PHB JUN TGFB1 NPM1     |
| GO:1905475 | regulation of protein localization to membrane                                | 3/20             | 177/18493      | 0.005           | TGFB1 BCL2L1 BCL2      |
| GO:0051052 | regulation of DNA metabolic process                                           | 4/20             | 412/18493      | 0.005           | JUN TGFB1 NPM1 PARP1   |

| ID         | Description                                              | GeneRatio | BgRatio   | p.adjust | geneID                  |
|------------|----------------------------------------------------------|-----------|-----------|----------|-------------------------|
| GO:1901987 | regulation of cell cycle phase transition                | 4/20      | 412/18493 | 0.005    | TGFB1 ATF5 BCL2 NPM1    |
| GO:0006611 | protein export from nucleus                              | 3/20      | 180/18493 | 0.005    | TGFB1 GSK3B NPM1        |
| GO:0051099 | positive regulation of binding                           | 3/20      | 181/18493 | 0.005    | TGFB1 GSK3B PARP1       |
| GO:0042307 | positive regulation of protein import into nucleus       | 2/20      | 42/18493  | 0.005    | TGFB1 SMAD3             |
| GO:0051147 | regulation of muscle cell differentiation                | 3/20      | 182/18493 | 0.005    | TGFB1 BCL2 GSK3A        |
| GO:0061138 | morphogenesis of a branching epithelium                  | 3/20      | 182/18493 | 0.005    | PPP1CA TGFB1 BCL2       |
| GO:0050864 | regulation of B cell activation                          | 3/20      | 183/18493 | 0.005    | TGFB1 BCL2 IL6          |
| GO:1903708 | positive regulation of hemopoiesis                       | 3/20      | 183/18493 | 0.005    | JUN STAT3 TGFB1         |
| GO:0001819 | positive regulation of cytokine production               | 4/20      | 422/18493 | 0.005    | TGFB1 SMAD3 IRF3 IL6    |
| GO:0032386 | regulation of intracellular transport                    | 4/20      | 422/18493 | 0.005    | TGFB1 SMAD3 GSK3A GSK3B |
| GO:0007212 | dopamine receptor signaling pathway                      | 2/20      | 43/18493  | 0.006    | GSK3A GSK3B             |
| GO:0032965 | regulation of collagen biosynthetic process              | 2/20      | 43/18493  | 0.006    | TGFB1 IL6               |
| GO:0050731 | positive regulation of peptidyl-tyrosine phosphorylation | 3/20      | 186/18493 | 0.006    | STAT3 TGFB1 IL6         |
| GO:0048608 | reproductive structure development                       | 4/20      | 428/18493 | 0.006    | TFEB PHB BCL2L1 BCL2    |
| GO:0002639 | positive regulation of immunoglobulin production         | 2/20      | 44/18493  | 0.006    | TGFB1 IL6               |
| GO:0070169 | positive regulation of biomineral tissue development     | 2/20      | 44/18493  | 0.006    | TGFB1 SMAD3             |
| GO:1904591 | positive regulation of protein import                    | 2/20      | 44/18493  | 0.006    | TGFB1 SMAD3             |
| GO:0061458 | reproductive system development                          | 4/20      | 431/18493 | 0.006    | TFEB PHB BCL2L1 BCL2    |
| GO:0001935 | endothelial cell proliferation                           | 3/20      | 190/18493 | 0.006    | STAT5A JUN STAT3        |
| GO:1901654 | response to ketone                                       | 3/20      | 190/18493 | 0.006    | TGFB1 BCL2L1 PARP1      |
| GO:0043401 | steroid hormone mediated signaling pathway               | 3/20      | 191/18493 | 0.006    | PHB SKP2 PARP1          |
| GO:0030857 | negative regulation of epithelial cell differentiation   | 2/20      | 46/18493  | 0.006    | GSK3A GSK3B             |
| GO:0031103 | axon regeneration                                        | 2/20      | 46/18493  | 0.006    | JUN BCL2                |
| GO:0035196 | production of miRNAs involved in gene silencing by miRNA | 2/20      | 46/18493  | 0.006    | TGFB1 SMAD3             |
| GO:0051168 | nuclear export                                           | 3/20      | 194/18493 | 0.006    | TGFB1 GSK3B NPM1        |
| GO:0002067 | glandular epithelial cell differentiation                | 2/20      | 47/18493  | 0.006    | GSK3A GSK3B             |
| GO:0006953 | acute-phase response                                     | 2/20      | 47/18493  | 0.006    | STAT3 IL6               |
| GO:0150076 | neuroinflammatory response                               | 2/20      | 47/18493  | 0.006    | JUN IL6                 |

| <b>ID</b>  | <b>Description</b>                                          | <b>GeneRatio</b> | <b>BgRatio</b> | <b>p.adjust</b> | <b>geneID</b>               |
|------------|-------------------------------------------------------------|------------------|----------------|-----------------|-----------------------------|
| GO:0001763 | morphogenesis of a branching structure                      | 3/20             | 196/18493      | 0.006           | PPP1CA TGFB1 BCL2           |
| GO:0002573 | myeloid leukocyte differentiation                           | 3/20             | 197/18493      | 0.006           | JUN TGFB1 PARP1             |
| GO:0003254 | regulation of membrane depolarization                       | 2/20             | 48/18493       | 0.006           | BCL2 PARP1                  |
| GO:0010712 | regulation of collagen metabolic process                    | 2/20             | 48/18493       | 0.006           | TGFB1 IL6                   |
| GO:0043525 | positive regulation of neuron apoptotic process             | 2/20             | 48/18493       | 0.006           | JUN MCL1                    |
| GO:0098586 | cellular response to virus                                  | 2/20             | 48/18493       | 0.006           | IRF3 BCL2L1                 |
| GO:2000725 | regulation of cardiac muscle cell differentiation           | 2/20             | 48/18493       | 0.006           | TGFB1 GSK3A                 |
| GO:0071222 | cellular response to lipopolysaccharide                     | 3/20             | 199/18493      | 0.006           | TGFB1 IRF3 IL6              |
| GO:0043254 | regulation of protein complex assembly                      | 4/20             | 451/18493      | 0.007           | JUN TGFB1 GSK3B<br>PARP1    |
| GO:0010718 | positive regulation of epithelial to mesenchymal transition | 2/20             | 49/18493       | 0.007           | TGFB1 SMAD3                 |
| GO:0031050 | dsRNA processing                                            | 2/20             | 49/18493       | 0.007           | TGFB1 SMAD3                 |
| GO:0048546 | digestive tract morphogenesis                               | 2/20             | 49/18493       | 0.007           | SMAD3 BCL2                  |
| GO:0070918 | production of small RNA involved in gene silencing by RNA   | 2/20             | 49/18493       | 0.007           | TGFB1 SMAD3                 |
| GO:0006006 | glucose metabolic process                                   | 3/20             | 204/18493      | 0.007           | PPP1CA GSK3A<br>GSK3B       |
| GO:0032886 | regulation of microtubule-based process                     | 3/20             | 204/18493      | 0.007           | ATF5 GSK3B NPM1             |
| GO:0001954 | positive regulation of cell-matrix adhesion                 | 2/20             | 50/18493       | 0.007           | SMAD3 GSK3B                 |
| GO:0050670 | regulation of lymphocyte proliferation                      | 3/20             | 205/18493      | 0.007           | TGFB1 BCL2 IL6              |
| GO:0032944 | regulation of mononuclear cell proliferation                | 3/20             | 206/18493      | 0.007           | TGFB1 BCL2 IL6              |
| GO:0035303 | regulation of dephosphorylation                             | 3/20             | 206/18493      | 0.007           | TGFB1 SMAD3 GSK3B           |
| GO:0071219 | cellular response to molecule of bacterial origin           | 3/20             | 206/18493      | 0.007           | TGFB1 IRF3 IL6              |
| GO:0016055 | Wnt signaling pathway                                       | 4/20             | 463/18493      | 0.007           | PPP1CA SMAD3<br>GSK3A GSK3B |
| GO:2000677 | regulation of transcription regulatory region DNA binding   | 2/20             | 51/18493       | 0.007           | TGFB1 PARP1                 |
| GO:0198738 | cell-cell signaling by wnt                                  | 4/20             | 465/18493      | 0.007           | PPP1CA SMAD3<br>GSK3A GSK3B |
| GO:0006914 | autophagy                                                   | 4/20             | 466/18493      | 0.007           | TFEB MCL1 BCL2<br>GSK3A     |
| GO:0061919 | process utilizing autophagic mechanism                      | 4/20             | 466/18493      | 0.007           | TFEB MCL1 BCL2<br>GSK3A     |
| GO:0002699 | positive regulation of immune effector process              | 3/20             | 209/18493      | 0.007           | PHB TGFB1 IL6               |
| GO:0010810 | regulation of cell-substrate adhesion                       | 3/20             | 209/18493      | 0.007           | SMAD3 BCL2 GSK3B            |

| <b>ID</b>  | <b>Description</b>                                                            | <b>GeneRatio</b> | <b>BgRatio</b> | <b>p.adjust</b> | <b>geneID</b>               |
|------------|-------------------------------------------------------------------------------|------------------|----------------|-----------------|-----------------------------|
| GO:0002763 | positive regulation of myeloid leukocyte differentiation                      | 2/20             | 52/18493       | 0.007           | JUN TGFB1                   |
| GO:0032964 | collagen biosynthetic process                                                 | 2/20             | 52/18493       | 0.007           | TGFB1 IL6                   |
| GO:0048641 | regulation of skeletal muscle tissue development                              | 2/20             | 52/18493       | 0.007           | TGFB1 BCL2                  |
| GO:2001169 | regulation of ATP biosynthetic process                                        | 2/20             | 52/18493       | 0.007           | STAT3 PARP1                 |
| GO:0050920 | regulation of chemotaxis                                                      | 3/20             | 210/18493      | 0.007           | TGFB1 SMAD3 IL6             |
| GO:0002526 | acute inflammatory response                                                   | 3/20             | 211/18493      | 0.007           | PHB STAT3 IL6               |
| GO:0006091 | generation of precursor metabolites and energy                                | 4/20             | 471/18493      | 0.007           | STAT3 PPP1CA GSK3A<br>GSK3B |
| GO:0043331 | response to dsRNA                                                             | 2/20             | 53/18493       | 0.007           | IRF3 NPM1                   |
| GO:0001649 | osteoblast differentiation                                                    | 3/20             | 214/18493      | 0.007           | PHB SMAD3 IL6               |
| GO:0008406 | gonad development                                                             | 3/20             | 216/18493      | 0.008           | PHB BCL2L1 BCL2             |
| GO:0070663 | regulation of leukocyte proliferation                                         | 3/20             | 216/18493      | 0.008           | TGFB1 BCL2 IL6              |
| GO:0002009 | morphogenesis of an epithelium                                                | 4/20             | 479/18493      | 0.008           | PPP1CA TGFB1<br>SMAD3 BCL2  |
| GO:0043393 | regulation of protein binding                                                 | 3/20             | 217/18493      | 0.008           | PPP1CA BCL2 GSK3B           |
| GO:0044839 | cell cycle G2/M phase transition                                              | 3/20             | 218/18493      | 0.008           | ATF5 SKP2 NPM1              |
| GO:0031102 | neuron projection regeneration                                                | 2/20             | 55/18493       | 0.008           | JUN BCL2                    |
| GO:0048146 | positive regulation of fibroblast proliferation                               | 2/20             | 55/18493       | 0.008           | JUN TGFB1                   |
| GO:0051054 | positive regulation of DNA metabolic process                                  | 3/20             | 220/18493      | 0.008           | JUN TGFB1 PARP1             |
| GO:0031663 | lipopolysaccharide-mediated signaling pathway                                 | 2/20             | 56/18493       | 0.008           | TGFB1 IRF3                  |
| GO:0035306 | positive regulation of dephosphorylation                                      | 2/20             | 56/18493       | 0.008           | TGFB1 SMAD3                 |
| GO:0045843 | negative regulation of striated muscle tissue development                     | 2/20             | 56/18493       | 0.008           | TGFB1 GSK3A                 |
| GO:0046605 | regulation of centrosome cycle                                                | 2/20             | 56/18493       | 0.008           | ATF5 NPM1                   |
| GO:1903749 | positive regulation of establishment of protein localization to mitochondrion | 2/20             | 56/18493       | 0.008           | BCL2 GSK3A                  |
| GO:0007160 | cell-matrix adhesion                                                          | 3/20             | 222/18493      | 0.008           | SMAD3 BCL2 GSK3B            |
| GO:0045137 | development of primary sexual characteristics                                 | 3/20             | 222/18493      | 0.008           | PHB BCL2L1 BCL2             |
| GO:2001234 | negative regulation of apoptotic signaling pathway                            | 3/20             | 222/18493      | 0.008           | BCL2L1 MCL1 BCL2            |
| GO:0002066 | columnar/cuboidal epithelial cell development                                 | 2/20             | 57/18493       | 0.008           | GSK3A GSK3B                 |
| GO:0042093 | T-helper cell differentiation                                                 | 2/20             | 57/18493       | 0.008           | STAT3 IL6                   |
| GO:0048635 | negative regulation of muscle organ development                               | 2/20             | 57/18493       | 0.008           | TGFB1 GSK3A                 |

| <b>ID</b>  | <b>Description</b>                                                                     | <b>GeneRatio</b> | <b>BgRatio</b> | <b>p.adjust</b> | <b>geneID</b>      |
|------------|----------------------------------------------------------------------------------------|------------------|----------------|-----------------|--------------------|
| GO:0000302 | response to reactive oxygen species                                                    | 3/20             | 224/18493      | 0.008           | JUN BCL2 IL6       |
| GO:0030520 | intracellular estrogen receptor signaling pathway                                      | 2/20             | 58/18493       | 0.008           | SKP2 PARP1         |
| GO:0043388 | positive regulation of DNA binding                                                     | 2/20             | 58/18493       | 0.008           | TGFB1 PARP1        |
| GO:1901862 | negative regulation of muscle tissue development                                       | 2/20             | 58/18493       | 0.008           | TGFB1 GSK3A        |
| GO:2000378 | negative regulation of reactive oxygen species metabolic process                       | 2/20             | 58/18493       | 0.008           | STAT3 BCL2         |
| GO:0002294 | CD4-positive, alpha-beta T cell differentiation involved in immune response            | 2/20             | 59/18493       | 0.009           | STAT3 IL6          |
| GO:0001658 | branching involved in ureteric bud morphogenesis                                       | 2/20             | 60/18493       | 0.009           | TGFB1 BCL2         |
| GO:0002287 | alpha-beta T cell activation involved in immune response                               | 2/20             | 60/18493       | 0.009           | STAT3 IL6          |
| GO:0002293 | alpha-beta T cell differentiation involved in immune response                          | 2/20             | 60/18493       | 0.009           | STAT3 IL6          |
| GO:0090092 | regulation of transmembrane receptor protein serine/threonine kinase signaling pathway | 3/20             | 235/18493      | 0.009           | TGFB1 SMAD3 PARP1  |
| GO:0009152 | purine ribonucleotide biosynthetic process                                             | 3/20             | 239/18493      | 0.01            | STAT3 TGFB1 PARP1  |
| GO:0002637 | regulation of immunoglobulin production                                                | 2/20             | 63/18493       | 0.01            | TGFB1 IL6          |
| GO:0009755 | hormone-mediated signaling pathway                                                     | 3/20             | 240/18493      | 0.01            | PHB SKP2 PARP1     |
| GO:0002260 | lymphocyte homeostasis                                                                 | 2/20             | 64/18493       | 0.01            | TGFB1 BCL2         |
| GO:0042306 | regulation of protein import into nucleus                                              | 2/20             | 64/18493       | 0.01            | TGFB1 SMAD3        |
| GO:1905207 | regulation of cardiocyte differentiation                                               | 2/20             | 64/18493       | 0.01            | TGFB1 GSK3A        |
| GO:0019318 | hexose metabolic process                                                               | 3/20             | 244/18493      | 0.01            | PPP1CA GSK3A GSK3B |
| GO:0050730 | regulation of peptidyl-tyrosine phosphorylation                                        | 3/20             | 245/18493      | 0.01            | STAT3 TGFB1 IL6    |
| GO:0070374 | positive regulation of ERK1 and ERK2 cascade                                           | 3/20             | 245/18493      | 0.01            | PHB JUN TGFB1      |
| GO:0051926 | negative regulation of calcium ion transport                                           | 2/20             | 65/18493       | 0.01            | TGFB1 BCL2         |
| GO:0060675 | ureteric bud morphogenesis                                                             | 2/20             | 65/18493       | 0.01            | TGFB1 BCL2         |
| GO:1904888 | cranial skeletal system development                                                    | 2/20             | 65/18493       | 0.01            | TGFB1 SMAD3        |

# **PATHWAY ENRICHMENT:**

**1 HCOV-HOST\_SET**

# 1.1 KEGG PATHWAY ENRICHMENT

## BARPLOT

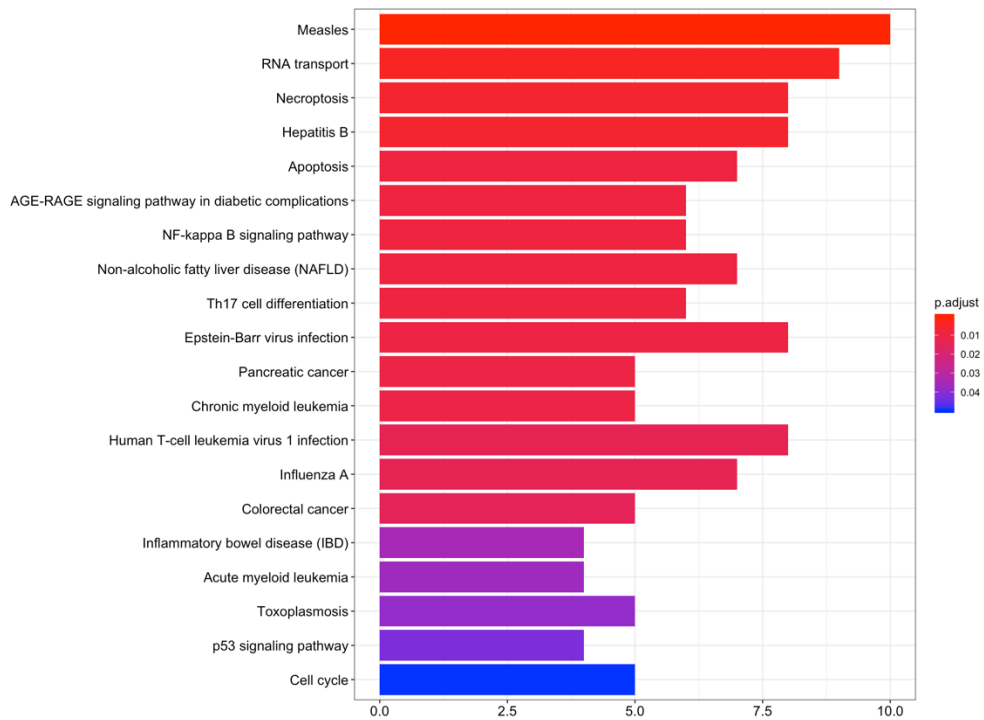

## NETPLOT

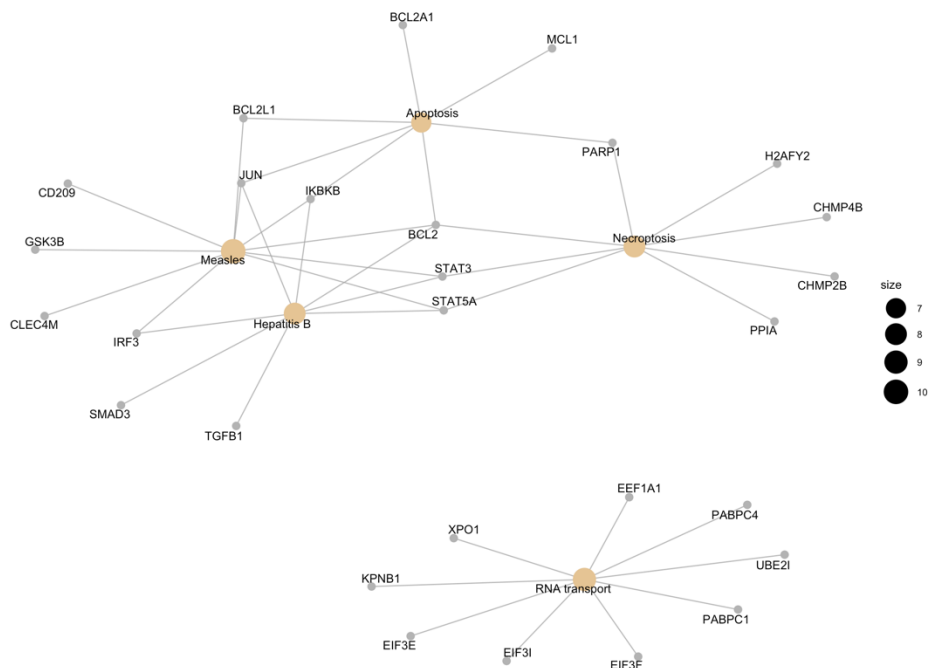

| ID       | Description                                             | GeneRatio | BgRatio  | p.adjust | geneID                                                        |
|----------|---------------------------------------------------------|-----------|----------|----------|---------------------------------------------------------------|
| hsa05162 | Measles                                                 | 10/76     | 138/8018 | 0        | STAT5A JUN STAT3 CD209 CLEC4M<br>IRF3 BCL2L1 BCL2 IKKBK GSK3B |
| hsa03013 | RNA transport                                           | 9/76      | 179/8018 | 0.004    | KPNB1 XPO1 EIF3E EIF3I EIF3F<br>PABPC1 PABPC4 EEF1A1 UBE2I    |
| hsa04217 | Necroptosis                                             | 8/76      | 159/8018 | 0.006    | STAT5A STAT3 PPIA BCL2 CHMP4B<br>PARP1 CHMP2B H2AFY2          |
| hsa05161 | Hepatitis B                                             | 8/76      | 162/8018 | 0.006    | STAT5A JUN STAT3 TGFB1 SMAD3<br>IRF3 BCL2 IKKBK               |
| hsa04210 | Apoptosis                                               | 7/76      | 136/8018 | 0.01     | JUN BCL2L1 MCL1 BCL2A1 BCL2<br>IKKBK PARP1                    |
| hsa04933 | AGE-RAGE signaling pathway in<br>diabetic complications | 6/76      | 100/8018 | 0.01     | STAT5A JUN STAT3 TGFB1 SMAD3<br>BCL2                          |
| hsa04064 | NF-kappa B signaling pathway                            | 6/76      | 104/8018 | 0.01     | BCL2L1 BCL2A1 BCL2 IKKBK PARP1<br>UBE2I                       |
| hsa04932 | Non-alcoholic fatty liver disease<br>(NAFLD)            | 7/76      | 149/8018 | 0.01     | JUN TGFB1 COX2 IKKBK GSK3A<br>GSK3B NDUFA10                   |
| hsa04659 | Th17 cell differentiation                               | 6/76      | 107/8018 | 0.01     | STAT5A JUN STAT3 TGFB1 SMAD3<br>IKKBK                         |
| hsa05169 | Epstein-Barr virus infection                            | 8/76      | 201/8018 | 0.01     | PSMC2 JUN STAT3 IRF3 BCL2 SKP2<br>IKKBK PSMD1                 |
| hsa05212 | Pancreatic cancer                                       | 5/76      | 76/8018  | 0.01     | STAT3 TGFB1 SMAD3 BCL2L1 IKKBK                                |
| hsa05220 | Chronic myeloid leukemia                                | 5/76      | 76/8018  | 0.01     | STAT5A TGFB1 SMAD3 BCL2L1<br>IKKBK                            |
| hsa05166 | Human T-cell leukemia virus 1 infection                 | 8/76      | 219/8018 | 0.013    | STAT5A JUN XPO1 TGFB1 SMAD3<br>BCL2L1 IKKBK CHEK2             |
| hsa05164 | Influenza A                                             | 7/76      | 170/8018 | 0.013    | XPO1 IRF3 KPNA2 TMRSS2 IKKBK<br>DNAJB1 TPSAB1                 |
| hsa05210 | Colorectal cancer                                       | 5/76      | 86/8018  | 0.015    | JUN TGFB1 SMAD3 BCL2 GSK3B                                    |
| hsa05321 | Inflammatory bowel disease (IBD)                        | 4/76      | 65/8018  | 0.035    | JUN STAT3 TGFB1 SMAD3                                         |
| hsa05221 | Acute myeloid leukemia                                  | 4/76      | 67/8018  | 0.036    | STAT5A STAT3 BCL2A1 IKKBK                                     |
| hsa05145 | Toxoplasmosis                                           | 5/76      | 112/8018 | 0.039    | STAT3 TGFB1 BCL2L1 BCL2 IKKBK                                 |
| hsa04115 | p53 signaling pathway                                   | 4/76      | 72/8018  | 0.042    | BCL2L1 BCL2 RRM2 CHEK2                                        |
| hsa04110 | Cell cycle                                              | 5/76      | 124/8018 | 0.05     | TGFB1 SMAD3 SKP2 GSK3B CHEK2                                  |
| hsa01521 | EGFR tyrosine kinase inhibitor<br>resistance            | 4/76      | 79/8018  | 0.05     | STAT3 BCL2L1 BCL2 GSK3B                                       |
| hsa03018 | RNA degradation                                         | 4/76      | 79/8018  | 0.05     | HSPD1 HSPA9 PABPC1 PABPC4                                     |
| hsa05131 | Shigellosis                                             | 7/76      | 236/8018 | 0.05     | JUN IRF3 BCL2L1 BCL2 IKKBK<br>GSK3A GSK3B                     |
| hsa05152 | Tuberculosis                                            | 6/76      | 180/8018 | 0.05     | TGFB1 CD209 CLEC4M BCL2 HSPD1<br>HSPA9                        |





| ID     | Description                                                        | GeneRatio | BgRatio  | p.adjust | geneID                                             |
|--------|--------------------------------------------------------------------|-----------|----------|----------|----------------------------------------------------|
| WP3872 | Regulation of Apoptosis by Parathyroid Hormone-related Protein     | 7/70      | 22/6249  | 0        | BCL2L1 BCL2L2 MCL1<br>BCL2A1 BCL2 GSK3A GSK3B      |
| WP4298 | Viral Acute Myocarditis                                            | 8/70      | 85/6249  | 0        | STAT3 TGFB1 BCL2L1 BCL2<br>GSK3B PABPC1 PARP1 CAV1 |
| WP127  | IL-5 Signaling Pathway                                             | 6/70      | 40/6249  | 0        | STAT5A JUN STAT3 BCL2<br>GSK3A GSK3B               |
| WP286  | IL-3 Signaling Pathway                                             | 6/70      | 49/6249  | 0.001    | STAT5A JUN STAT3 TGFB1<br>BCL2L1 BCL2              |
| WP3646 | Hepatitis C and Hepatocellular Carcinoma                           | 6/70      | 51/6249  | 0.001    | JUN STAT3 TGFB1 SMAD3<br>BCL2L1 RRM2               |
| WP254  | Apoptosis                                                          | 7/70      | 86/6249  | 0.001    | JUN IRF3 BCL2L1 BCL2L2<br>MCL1 BCL2 IKKBK          |
| WP1772 | Apoptosis Modulation and Signaling                                 | 7/70      | 94/6249  | 0.002    | JUN BCL2L1 BCL2L2 MCL1<br>BCL2A1 BCL2 IKKBK        |
| WP205  | IL-7 Signaling Pathway                                             | 4/70      | 25/6249  | 0.004    | STAT5A STAT3 BCL2L1<br>GSK3B                       |
| WP2034 | Leptin signaling pathway                                           | 6/70      | 76/6249  | 0.004    | STAT3 BCL2L1 KPNA4 IKKBK<br>GSK3A GSK3B            |
| WP107  | Translation Factors                                                | 5/70      | 54/6249  | 0.006    | EIF3E EIF3I EIF3F PABPC1<br>EEF1A1                 |
| WP560  | TGF-beta Receptor Signaling                                        | 5/70      | 58/6249  | 0.008    | JUN STAT3 TGFB1 SMAD3<br>FKBP1A                    |
| WP138  | Androgen receptor signaling pathway                                | 6/70      | 91/6249  | 0.009    | JUN STAT3 SMAD3 GSK3B<br>CAV1 UBE2I                |
| WP2324 | AGE/RAGE pathway                                                   | 5/70      | 66/6249  | 0.013    | STAT5A JUN STAT3 SMAD3<br>IKKBK                    |
| WP49   | IL-2 Signaling Pathway                                             | 4/70      | 42/6249  | 0.017    | STAT5A JUN STAT3 BCL2                              |
| WP4216 | Chromosomal and microsatellite instability in colorectal cancer    | 5/70      | 74/6249  | 0.018    | JUN TGFB1 SMAD3 BCL2<br>GSK3B                      |
| WP2332 | Interleukin-11 Signaling Pathway                                   | 4/70      | 44/6249  | 0.018    | STAT3 TGFB1 BCL2 IKKBK                             |
| WP2037 | Prolactin Signaling Pathway                                        | 5/70      | 76/6249  | 0.018    | STAT5A JUN STAT3 PPIA<br>GSK3B                     |
| WP3657 | Hematopoietic Stem Cell Gene Regulation by GABP alpha/beta Complex | 3/70      | 22/6249  | 0.02     | BCL2L1 MCL1 BCL2                                   |
| WP712  | Estrogen signaling pathway                                         | 3/70      | 23/6249  | 0.022    | JUN BCL2 IKKBK                                     |
| WP3611 | Photodynamic therapy-induced AP-1 survival signaling.              | 4/70      | 51/6249  | 0.025    | JUN BCL2L1 MCL1 BCL2                               |
| WP4263 | Pancreatic adenocarcinoma pathway                                  | 5/70      | 89/6249  | 0.029    | STAT3 TGFB1 SMAD3 BCL2L1<br>IKKBK                  |
| WP4217 | Ebola Virus Pathway on Host                                        | 6/70      | 129/6249 | 0.029    | CLEC4G CD209 CLEC4M IRF3<br>PRKRA CAV1             |
| WP366  | TGF-beta Signaling Pathway                                         | 6/70      | 133/6249 | 0.031    | JUN TGFB1 SMAD3 HGS<br>CAV1 UBE2I                  |

| <b>ID</b> | <b>Description</b>                                    | <b>GeneRatio</b> | <b>BgRatio</b> | <b>p.adjust</b> | <b>geneID</b>                               |
|-----------|-------------------------------------------------------|------------------|----------------|-----------------|---------------------------------------------|
| WP411     | mRNA Processing                                       | 6/70             | 133/6249       | 0.031           | HNRNPA1 PTBP1 HNRNPA2B1<br>SRP54 NONO DDX1  |
| WP3972    | PDGFR-beta pathway                                    | 3/70             | 29/6249        | 0.033           | STAT5A JUN STAT3                            |
| WP3888    | VEGFA-VEGFR2 Signaling Pathway                        | 8/70             | 238/6249       | 0.037           | JUN STAT3 BCL2L1 BCL2<br>GSK3B NCL HGS CAV1 |
| WP2112    | IL17 signaling pathway                                | 3/70             | 31/6249        | 0.037           | STAT3 IKBKB GSK3B                           |
| WP615     | Senescence and Autophagy in Cancer                    | 5/70             | 106/6249       | 0.047           | JUN TGFB1 SMAD3 BCL2<br>GSK3B               |
| WP3617    | Photodynamic therapy-induced NF-kB survival signaling | 3/70             | 35/6249        | 0.048           | BCL2L2 BCL2A1 IKBKB                         |

# 2 HCOV-CLUSTER\_SET

## 2.1 KEGG PATHWAY ENRICHMENT

### BARPLOT

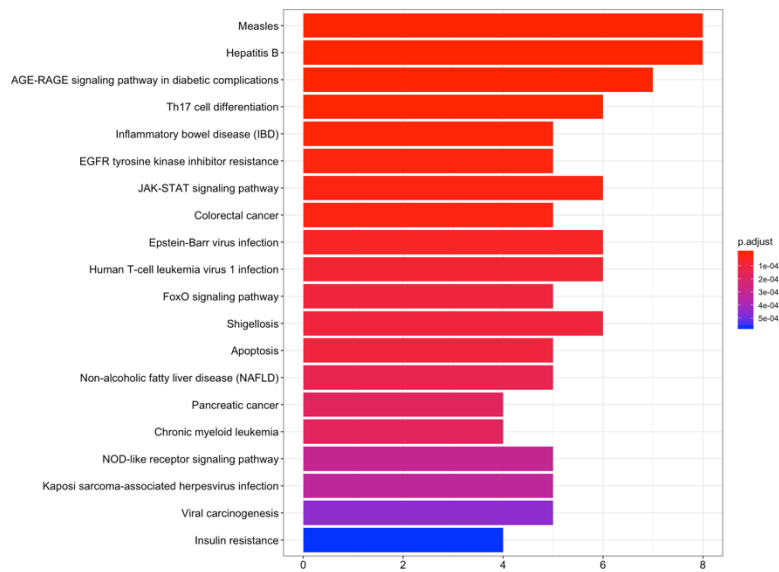

### NETPLOT

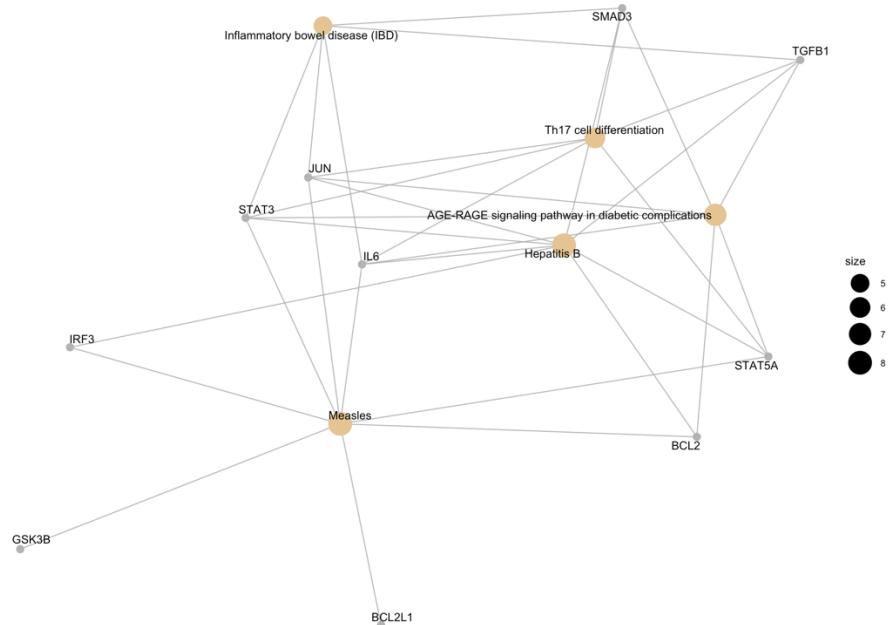

| ID       | Description                                          | GeneRatio | BgRatio  | p.adjust | geneID                                         |
|----------|------------------------------------------------------|-----------|----------|----------|------------------------------------------------|
| hsa05162 | Measles                                              | 8/18      | 138/8018 | 0        | STAT5A JUN STAT3 IRF3<br>BCL2L1 BCL2 GSK3B IL6 |
| hsa05161 | Hepatitis B                                          | 8/18      | 162/8018 | 0        | STAT5A JUN STAT3 TGFB1<br>SMAD3 IRF3 BCL2 IL6  |
| hsa04933 | AGE-RAGE signaling pathway in diabetic complications | 7/18      | 100/8018 | 0        | STAT5A JUN STAT3 TGFB1<br>SMAD3 BCL2 IL6       |
| hsa04659 | Th17 cell differentiation                            | 6/18      | 107/8018 | 0        | STAT5A JUN STAT3 TGFB1<br>SMAD3 IL6            |
| hsa05321 | Inflammatory bowel disease (IBD)                     | 5/18      | 65/8018  | 0        | JUN STAT3 TGFB1 SMAD3 IL6                      |
| hsa01521 | EGFR tyrosine kinase inhibitor resistance            | 5/18      | 79/8018  | 0        | STAT3 BCL2L1 BCL2 GSK3B IL6                    |
| hsa04630 | JAK-STAT signaling pathway                           | 6/18      | 162/8018 | 0        | STAT5A STAT3 BCL2L1 MCL1<br>BCL2 IL6           |
| hsa05210 | Colorectal cancer                                    | 5/18      | 86/8018  | 0        | JUN TGFB1 SMAD3 BCL2<br>GSK3B                  |
| hsa05169 | Epstein-Barr virus infection                         | 6/18      | 201/8018 | 0        | JUN STAT3 IRF3 BCL2 SKP2 IL6                   |
| hsa05166 | Human T-cell leukemia virus 1 infection              | 6/18      | 219/8018 | 0        | STAT5A JUN TGFB1 SMAD3<br>BCL2L1 IL6           |
| hsa04068 | FoxO signaling pathway                               | 5/18      | 131/8018 | 0        | STAT3 TGFB1 SMAD3 SKP2 IL6                     |
| hsa05131 | Shigellosis                                          | 6/18      | 236/8018 | 0        | JUN IRF3 BCL2L1 BCL2 GSK3A<br>GSK3B            |
| hsa04210 | Apoptosis                                            | 5/18      | 136/8018 | 0        | JUN BCL2L1 MCL1 BCL2 PARP1                     |
| hsa04932 | Non-alcoholic fatty liver disease (NAFLD)            | 5/18      | 149/8018 | 0        | JUN TGFB1 GSK3A GSK3B IL6                      |
| hsa05212 | Pancreatic cancer                                    | 4/18      | 76/8018  | 0        | STAT3 TGFB1 SMAD3 BCL2L1                       |
| hsa05220 | Chronic myeloid leukemia                             | 4/18      | 76/8018  | 0        | STAT5A TGFB1 SMAD3 BCL2L1                      |
| hsa04621 | NOD-like receptor signaling pathway                  | 5/18      | 181/8018 | 0        | JUN IRF3 BCL2L1 BCL2 IL6                       |
| hsa05167 | Kaposi sarcoma-associated herpesvirus infection      | 5/18      | 186/8018 | 0        | JUN STAT3 IRF3 GSK3B IL6                       |
| hsa05203 | Viral carcinogenesis                                 | 5/18      | 201/8018 | 0        | STAT5A JUN STAT3 IRF3 SKP2                     |
| hsa04931 | Insulin resistance                                   | 4/18      | 108/8018 | 0.001    | STAT3 PPP1CA GSK3B IL6                         |
| hsa05145 | Toxoplasmosis                                        | 4/18      | 112/8018 | 0.001    | STAT3 TGFB1 BCL2L1 BCL2                        |
| hsa05135 | Yersinia infection                                   | 4/18      | 120/8018 | 0.001    | JUN IRF3 GSK3B IL6                             |
| hsa04110 | Cell cycle                                           | 4/18      | 124/8018 | 0.001    | TGFB1 SMAD3 SKP2 GSK3B                         |
| hsa05226 | Gastric cancer                                       | 4/18      | 149/8018 | 0.002    | TGFB1 SMAD3 BCL2 GSK3B                         |
| hsa04390 | Hippo signaling pathway                              | 4/18      | 157/8018 | 0.002    | PPP1CA TGFB1 SMAD3 GSK3B                       |
| hsa04217 | Necroptosis                                          | 4/18      | 159/8018 | 0.002    | STAT5A STAT3 BCL2 PARP1                        |
| hsa04218 | Cellular senescence                                  | 4/18      | 160/8018 | 0.002    | PPP1CA TGFB1 SMAD3 IL6                         |

| ID       | Description                                              | GeneRatio | BgRatio  | p.adjust | geneID                      |
|----------|----------------------------------------------------------|-----------|----------|----------|-----------------------------|
| hsa04137 | Mitophagy - animal                                       | 3/18      | 65/8018  | 0.002    | TFEB JUN BCL2L1             |
| hsa05225 | Hepatocellular carcinoma                                 | 4/18      | 168/8018 | 0.002    | TGFB1 SMAD3 BCL2L1 GSK3B    |
| hsa04917 | Prolactin signaling pathway                              | 3/18      | 70/8018  | 0.002    | STAT5A STAT3 GSK3B          |
| hsa05133 | Pertussis                                                | 3/18      | 76/8018  | 0.003    | JUN IRF3 IL6                |
| hsa04012 | ErbB signaling pathway                                   | 3/18      | 85/8018  | 0.004    | STAT5A JUN GSK3B            |
| hsa04510 | Focal adhesion                                           | 4/18      | 199/8018 | 0.004    | JUN PPP1CA BCL2 GSK3B       |
| hsa04151 | PI3K-Akt signaling pathway                               | 5/18      | 354/8018 | 0.004    | BCL2L1 MCL1 BCL2 GSK3B IL6  |
| hsa05222 | Small cell lung cancer                                   | 3/18      | 92/8018  | 0.004    | BCL2L1 BCL2 SKP2            |
| hsa05170 | Human immunodeficiency virus 1 infection                 | 4/18      | 212/8018 | 0.004    | JUN IRF3 BCL2L1 BCL2        |
| hsa05323 | Rheumatoid arthritis                                     | 3/18      | 93/8018  | 0.004    | JUN TGFB1 IL6               |
| hsa04657 | IL-17 signaling pathway                                  | 3/18      | 94/8018  | 0.004    | JUN GSK3B IL6               |
| hsa05163 | Human cytomegalovirus infection                          | 4/18      | 225/8018 | 0.005    | STAT3 IRF3 GSK3B IL6        |
| hsa05142 | Chagas disease (American trypanosomiasis)                | 3/18      | 102/8018 | 0.005    | JUN TGFB1 IL6               |
| hsa04064 | NF-kappa B signaling pathway                             | 3/18      | 104/8018 | 0.005    | BCL2L1 BCL2 PARP1           |
| hsa04620 | Toll-like receptor signaling pathway                     | 3/18      | 104/8018 | 0.005    | JUN IRF3 IL6                |
| hsa04066 | HIF-1 signaling pathway                                  | 3/18      | 109/8018 | 0.006    | STAT3 BCL2 IL6              |
| hsa04722 | Neurotrophin signaling pathway                           | 3/18      | 119/8018 | 0.007    | JUN BCL2 GSK3B              |
| hsa04935 | Growth hormone synthesis, secretion and action           | 3/18      | 119/8018 | 0.007    | STAT5A STAT3 GSK3B          |
| hsa04215 | Apoptosis - multiple species                             | 2/18      | 32/8018  | 0.007    | BCL2L1 BCL2                 |
| hsa04728 | Dopaminergic synapse                                     | 3/18      | 132/8018 | 0.009    | PPP1CA GSK3A GSK3B          |
| hsa04550 | Signaling pathways regulating pluripotency of stem cells | 3/18      | 142/8018 | 0.01     | STAT3 SMAD3 GSK3B           |
| hsa05168 | Herpes simplex virus 1 infection                         | 5/18      | 491/8018 | 0.01     | PPP1CA IRF3 BCL2L1 BCL2 IL6 |
| hsa05160 | Hepatitis C                                              | 3/18      | 155/8018 | 0.013    | STAT3 IRF3 GSK3B            |
| hsa04310 | Wnt signaling pathway                                    | 3/18      | 160/8018 | 0.014    | JUN SMAD3 GSK3B             |
| hsa04672 | Intestinal immune network for IgA production             | 2/18      | 49/8018  | 0.014    | TGFB1 IL6                   |
| hsa04340 | Hedgehog signaling pathway                               | 2/18      | 50/8018  | 0.014    | BCL2 GSK3B                  |
| hsa05144 | Malaria                                                  | 2/18      | 50/8018  | 0.014    | TGFB1 IL6                   |
| hsa05014 | Amyotrophic lateral sclerosis (ALS)                      | 2/18      | 57/8018  | 0.017    | BCL2L1 BCL2                 |
| hsa05152 | Tuberculosis                                             | 3/18      | 180/8018 | 0.017    | TGFB1 BCL2 IL6              |

| <b>ID</b> | <b>Description</b>                                     | <b>GeneRatio</b> | <b>BgRatio</b> | <b>p.adjust</b> | <b>geneID</b>      |
|-----------|--------------------------------------------------------|------------------|----------------|-----------------|--------------------|
| hsa04062  | Chemokine signaling pathway                            | 3/18             | 189/8018       | 0.02            | STAT3 GSK3A GSK3B  |
| hsa04623  | Cytosolic DNA-sensing pathway                          | 2/18             | 63/8018        | 0.02            | IRF3 IL6           |
| hsa05223  | Non-small cell lung cancer                             | 2/18             | 66/8018        | 0.022           | STAT5A STAT3       |
| hsa05221  | Acute myeloid leukemia                                 | 2/18             | 67/8018        | 0.022           | STAT5A STAT3       |
| hsa05205  | Proteoglycans in cancer                                | 3/18             | 204/8018       | 0.022           | STAT3 PPP1CA TGFB1 |
| hsa05031  | Amphetamine addiction                                  | 2/18             | 69/8018        | 0.022           | JUN PPP1CA         |
| hsa05211  | Renal cell carcinoma                                   | 2/18             | 69/8018        | 0.022           | JUN TGFB1          |
| hsa04115  | p53 signaling pathway                                  | 2/18             | 72/8018        | 0.024           | BCL2L1 BCL2        |
| hsa05132  | Salmonella infection                                   | 3/18             | 214/8018       | 0.024           | JUN BCL2 IL6       |
| hsa01524  | Platinum drug resistance                               | 2/18             | 73/8018        | 0.024           | BCL2L1 BCL2        |
| hsa05140  | Leishmaniasis                                          | 2/18             | 77/8018        | 0.026           | JUN TGFB1          |
| hsa04662  | B cell receptor signaling pathway                      | 2/18             | 82/8018        | 0.029           | JUN GSK3B          |
| hsa05235  | PD-L1 expression and PD-1 checkpoint pathway in cancer | 2/18             | 89/8018        | 0.033           | JUN STAT3          |
| hsa05410  | Hypertrophic cardiomyopathy (HCM)                      | 2/18             | 90/8018        | 0.033           | TGFB1 IL6          |
| hsa04658  | Th1 and Th2 cell differentiation                       | 2/18             | 92/8018        | 0.034           | STAT5A JUN         |
| hsa04350  | TGF-beta signaling pathway                             | 2/18             | 94/8018        | 0.035           | TGFB1 SMAD3        |
| hsa05215  | Prostate cancer                                        | 2/18             | 97/8018        | 0.037           | BCL2 GSK3B         |
| hsa01522  | Endocrine resistance                                   | 2/18             | 98/8018        | 0.037           | JUN BCL2           |
| hsa05146  | Amoebiasis                                             | 2/18             | 102/8018       | 0.04            | TGFB1 IL6          |
| hsa04625  | C-type lectin receptor signaling pathway               | 2/18             | 104/8018       | 0.04            | JUN IL6            |
| hsa04660  | T cell receptor signaling pathway                      | 2/18             | 104/8018       | 0.04            | JUN GSK3B          |
| hsa04928  | Parathyroid hormone synthesis, secretion and action    | 2/18             | 106/8018       | 0.041           | BCL2 NACA          |
| hsa04668  | TNF signaling pathway                                  | 2/18             | 112/8018       | 0.045           | JUN IL6            |

## 2.2 WIKI PATHWAY

# BARPLOT

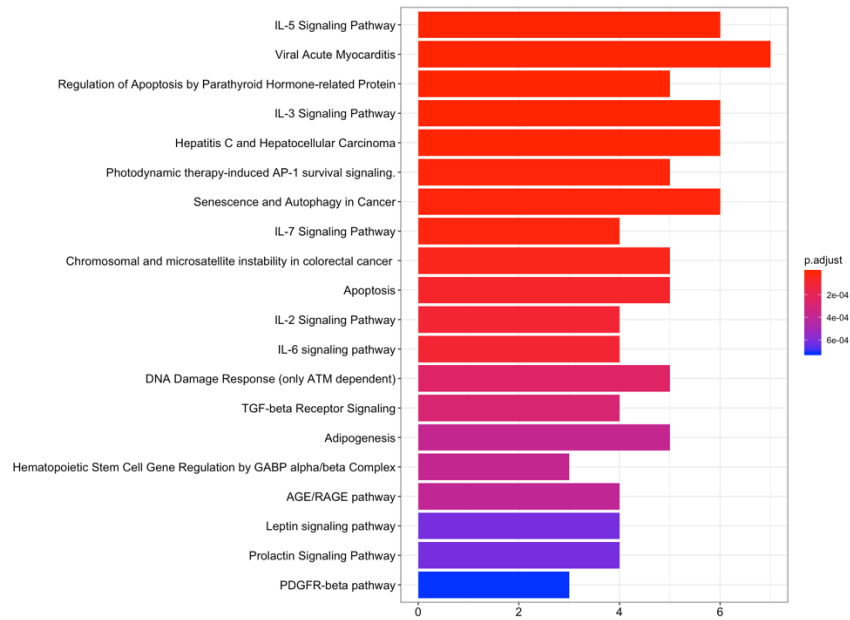

# NETPLOT

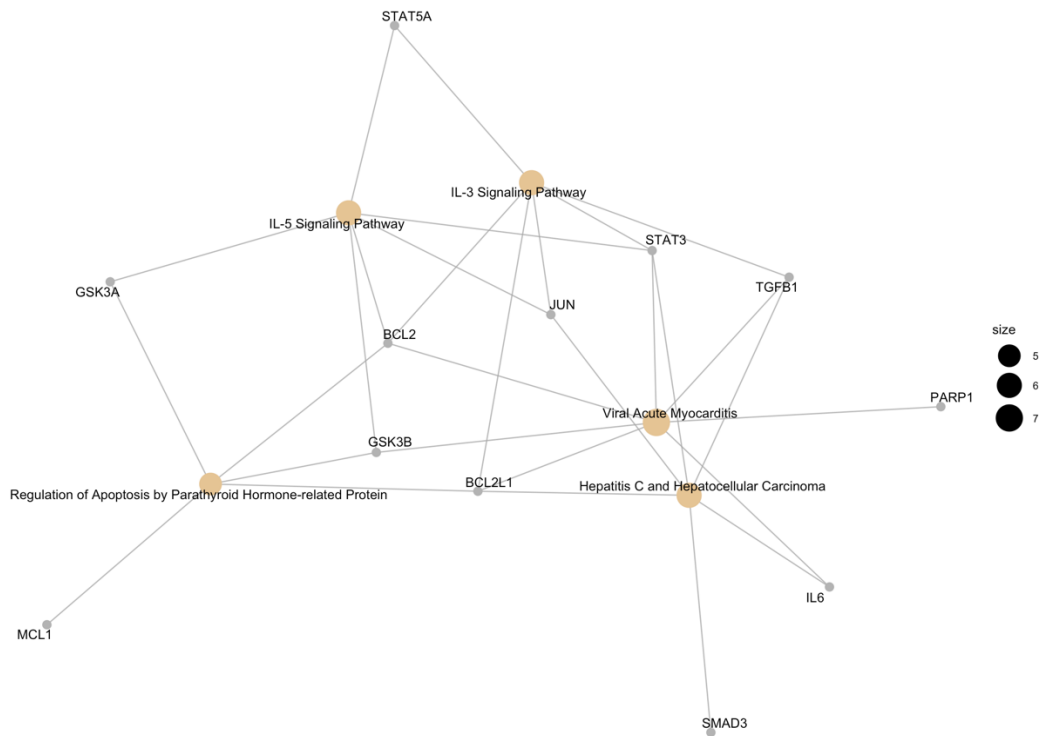



| <b>ID</b> | <b>Description</b>                                                 | <b>GeneRatio</b> | <b>BgRatio</b> | <b>p.adjust</b> | <b>geneID</b>                                 |
|-----------|--------------------------------------------------------------------|------------------|----------------|-----------------|-----------------------------------------------|
| WP127     | IL-5 Signaling Pathway                                             | 6/19             | 40/6249        | 0               | STAT5A JUN STAT3<br>BCL2 GSK3A GSK3B          |
| WP4298    | Viral Acute Myocarditis                                            | 7/19             | 85/6249        | 0               | STAT3 TGFB1 BCL2L1<br>BCL2 GSK3B PARP1<br>IL6 |
| WP3872    | Regulation of Apoptosis by Parathyroid Hormone-related Protein     | 5/19             | 22/6249        | 0               | BCL2L1 MCL1 BCL2<br>GSK3A GSK3B               |
| WP286     | IL-3 Signaling Pathway                                             | 6/19             | 49/6249        | 0               | STAT5A JUN STAT3<br>TGFB1 BCL2L1 BCL2         |
| WP3646    | Hepatitis C and Hepatocellular Carcinoma                           | 6/19             | 51/6249        | 0               | JUN STAT3 TGFB1<br>SMAD3 BCL2L1 IL6           |
| WP3611    | Photodynamic therapy-induced AP-1 survival signaling.              | 5/19             | 51/6249        | 0               | JUN BCL2L1 MCL1<br>BCL2 IL6                   |
| WP615     | Senescence and Autophagy in Cancer                                 | 6/19             | 106/6249       | 0               | JUN TGFB1 SMAD3<br>BCL2 GSK3B IL6             |
| WP205     | IL-7 Signaling Pathway                                             | 4/19             | 25/6249        | 0               | STAT5A STAT3<br>BCL2L1 GSK3B                  |
| WP4216    | Chromosomal and microsatellite instability in colorectal cancer    | 5/19             | 74/6249        | 0               | JUN TGFB1 SMAD3<br>BCL2 GSK3B                 |
| WP254     | Apoptosis                                                          | 5/19             | 86/6249        | 0               | JUN IRF3 BCL2L1<br>MCL1 BCL2                  |
| WP49      | IL-2 Signaling Pathway                                             | 4/19             | 42/6249        | 0               | STAT5A JUN STAT3<br>BCL2                      |
| WP364     | IL-6 signaling pathway                                             | 4/19             | 43/6249        | 0               | STAT3 BCL2L1 GSK3B<br>IL6                     |
| WP710     | DNA Damage Response (only ATM dependent)                           | 5/19             | 115/6249       | 0               | JUN TGFB1 SMAD3<br>BCL2 GSK3B                 |
| WP560     | TGF-beta Receptor Signaling                                        | 4/19             | 58/6249        | 0               | JUN STAT3 TGFB1<br>SMAD3                      |
| WP236     | Adipogenesis                                                       | 5/19             | 131/6249       | 0               | STAT5A STAT3 TGFB1<br>SMAD3 IL6               |
| WP3657    | Hematopoietic Stem Cell Gene Regulation by GABP alpha/beta Complex | 3/19             | 22/6249        | 0               | BCL2L1 MCL1 BCL2                              |
| WP2324    | AGE/RAGE pathway                                                   | 4/19             | 66/6249        | 0               | STAT5A JUN STAT3<br>SMAD3                     |
| WP2034    | Leptin signaling pathway                                           | 4/19             | 76/6249        | 0.001           | STAT3 BCL2L1 GSK3A<br>GSK3B                   |
| WP2037    | Prolactin Signaling Pathway                                        | 4/19             | 76/6249        | 0.001           | STAT5A JUN STAT3<br>GSK3B                     |
| WP3972    | PDGFR-beta pathway                                                 | 3/19             | 29/6249        | 0.001           | STAT5A JUN STAT3                              |
| WP4263    | Pancreatic adenocarcinoma pathway                                  | 4/19             | 89/6249        | 0.001           | STAT3 TGFB1 SMAD3<br>BCL2L1                   |
| WP138     | Androgen receptor signaling pathway                                | 4/19             | 91/6249        | 0.001           | JUN STAT3 SMAD3<br>GSK3B                      |

| <b>ID</b> | <b>Description</b>                                                                     | <b>GeneRatio</b> | <b>BgRatio</b> | <b>p.adjust</b> | <b>geneID</b>                  |
|-----------|----------------------------------------------------------------------------------------|------------------|----------------|-----------------|--------------------------------|
| WP2355    | Corticotropin-releasing hormone signaling pathway                                      | 4/19             | 93/6249        | 0.001           | TGFB1 BCL2 GSK3B<br>PARP1      |
| WP1772    | Apoptosis Modulation and Signaling                                                     | 4/19             | 94/6249        | 0.001           | JUN BCL2L1 MCL1<br>BCL2        |
| WP2036    | TNF related weak inducer of apoptosis (TWEAK) Signaling Pathway                        | 3/19             | 42/6249        | 0.002           | JUN GSK3B IL6                  |
| WP2332    | Interleukin-11 Signaling Pathway                                                       | 3/19             | 44/6249        | 0.002           | STAT3 TGFB1 BCL2               |
| WP314     | Fas Ligand (FasL) pathway and Stress induction of Heat Shock Proteins (HSP) regulation | 3/19             | 44/6249        | 0.002           | JUN BCL2 PARP1                 |
| WP3594    | Circadian rythm related genes                                                          | 5/19             | 207/6249       | 0.002           | JUN PPP1CA ATF5<br>GSK3B IL6   |
| WP2203    | Thymic Stromal LymphoPoietin (TSLP) Signaling Pathway                                  | 3/19             | 47/6249        | 0.002           | STAT5A STAT3 IL6               |
| WP179     | Cell Cycle                                                                             | 4/19             | 122/6249       | 0.002           | TGFB1 SMAD3 SKP2<br>GSK3B      |
| WP673     | ErbB Signaling Pathway                                                                 | 3/19             | 54/6249        | 0.003           | STAT5A JUN GSK3B               |
| WP1559    | TFs Regulate miRNAs related to cardiac hypertrophy                                     | 2/19             | 12/6249        | 0.003           | STAT3 TGFB1                    |
| WP3888    | VEGFA-VEGFR2 Signaling Pathway                                                         | 5/19             | 238/6249       | 0.003           | JUN STAT3 BCL2L1<br>BCL2 GSK3B |
| WP2881    | Estrogen Receptor Pathway                                                              | 2/19             | 13/6249        | 0.003           | JUN STAT3                      |
| WP304     | Kit receptor signaling pathway                                                         | 3/19             | 60/6249        | 0.004           | STAT5A STAT3 BCL2              |
| WP2380    | Brain-Derived Neurotrophic Factor (BDNF) signaling pathway                             | 4/19             | 144/6249       | 0.004           | STAT5A JUN STAT3<br>GSK3B      |
| WP1984    | Integrated Breast Cancer Pathway                                                       | 4/19             | 154/6249       | 0.005           | PHB JUN BCL2 GSK3A             |
| WP3680    | Association Between Physico-Chemical Features and Toxicity Associated Pathways         | 3/19             | 68/6249        | 0.005           | STAT5A JUN GSK3B               |
| WP3874    | Canonical and Non-Canonical TGF-B signaling                                            | 2/19             | 17/6249        | 0.005           | TGFB1 SMAD3                    |
| WP3859    | TGF-B Signaling in Thyroid Cells for Epithelial-Mesenchymal Transition                 | 2/19             | 18/6249        | 0.006           | TGFB1 SMAD3                    |
| WP22      | IL-9 Signaling Pathway                                                                 | 2/19             | 19/6249        | 0.006           | STAT5A STAT3                   |
| WP3287    | Overview of nanoparticle effects                                                       | 2/19             | 19/6249        | 0.006           | BCL2 IL6                       |
| WP2507    | Nanomaterial induced apoptosis                                                         | 2/19             | 21/6249        | 0.007           | BCL2L1 MCL1                    |
| WP712     | Estrogen signaling pathway                                                             | 2/19             | 23/6249        | 0.008           | JUN BCL2                       |
| WP69      | T-Cell antigen Receptor (TCR) Signaling Pathway                                        | 3/19             | 91/6249        | 0.009           | JUN TGFB1 IL6                  |
| WP1528    | Physiological and Pathological Hypertrophy of the Heart                                | 2/19             | 25/6249        | 0.009           | JUN STAT3                      |
| WP231     | TNF alpha Signaling Pathway                                                            | 3/19             | 94/6249        | 0.01            | JUN BCL2L1 IL6                 |
| WP581     | EPO Receptor Signaling                                                                 | 2/19             | 26/6249        | 0.01            | STAT5A STAT3                   |

| <b>ID</b> | <b>Description</b>                                                             | <b>GeneRatio</b> | <b>BgRatio</b> | <b>p.adjust</b> | <b>geneID</b>              |
|-----------|--------------------------------------------------------------------------------|------------------|----------------|-----------------|----------------------------|
| WP306     | Focal Adhesion                                                                 | 4/19             | 202/6249       | 0.01            | JUN PPP1CA BCL2 GSK3B      |
| WP530     | Cytokines and Inflammatory Response                                            | 2/19             | 27/6249        | 0.01            | TGFB1 IL6                  |
| WP23      | B Cell Receptor Signaling Pathway                                              | 3/19             | 98/6249        | 0.01            | JUN GSK3A GSK3B            |
| WP4172    | PI3K-Akt Signaling Pathway                                                     | 5/19             | 345/6249       | 0.01            | BCL2L1 MCL1 BCL2 GSK3B IL6 |
| WP4300    | Extracellular vesicles in the crosstalk of cardiac cells                       | 2/19             | 28/6249        | 0.01            | STAT3 IL6                  |
| WP1544    | MicroRNAs in cardiomyocyte hypertrophy                                         | 3/19             | 102/6249       | 0.01            | STAT3 TGFB1 GSK3B          |
| WP2583    | T-Cell Receptor and Co-stimulatory Signaling                                   | 2/19             | 29/6249        | 0.01            | GSK3A GSK3B                |
| WP75      | Toll-like Receptor Signaling Pathway                                           | 3/19             | 103/6249       | 0.01            | JUN IRF3 IL6               |
| WP2855    | Dopaminergic Neurogenesis                                                      | 2/19             | 30/6249        | 0.01            | STAT3 TGFB1                |
| WP2870    | Extracellular vesicle-mediated signaling in recipient cells                    | 2/19             | 30/6249        | 0.01            | TGFB1 SMAD3                |
| WP3844    | PI3K-AKT-mTOR signaling pathway and therapeutic opportunities                  | 2/19             | 30/6249        | 0.01            | TFEB GSK3B                 |
| WP3851    | TLR4 Signaling and Tolerance                                                   | 2/19             | 30/6249        | 0.01            | IRF3 IL6                   |
| WP2112    | IL17 signaling pathway                                                         | 2/19             | 31/6249        | 0.011           | STAT3 GSK3B                |
| WP3850    | Factors and pathways affecting insulin-like growth factor (IGF1)-Akt signaling | 2/19             | 31/6249        | 0.011           | SMAD3 GSK3B                |
| WP4149    | White fat cell differentiation                                                 | 2/19             | 33/6249        | 0.012           | STAT5A IRF3                |
| WP313     | Signaling of Hepatocyte Growth Factor Receptor                                 | 2/19             | 34/6249        | 0.013           | JUN STAT3                  |
| WP4241    | Type 2 papillary renal cell carcinoma                                          | 2/19             | 36/6249        | 0.014           | TFEB TGFB1                 |
| WP3931    | ESC Pluripotency Pathways                                                      | 3/19             | 119/6249       | 0.014           | JUN STAT3 GSK3B            |
| WP3614    | Photodynamic therapy-induced HIF-1 survival signaling                          | 2/19             | 37/6249        | 0.014           | BCL2L1 MCL1                |
| WP3995    | Prion disease pathway                                                          | 2/19             | 37/6249        | 0.014           | STAT3 BCL2                 |
| WP2447    | Amyotrophic lateral sclerosis (ALS)                                            | 2/19             | 38/6249        | 0.014           | BCL2L1 BCL2                |
| WP4136    | Fibrin Complement Receptor 3 Signaling Pathway                                 | 2/19             | 38/6249        | 0.014           | IRF3 IL6                   |
| WP2526    | PDGF Pathway                                                                   | 2/19             | 39/6249        | 0.015           | JUN STAT3                  |
| WP500     | Glycogen Metabolism                                                            | 2/19             | 40/6249        | 0.015           | GSK3A GSK3B                |
| WP366     | TGF-beta Signaling Pathway                                                     | 3/19             | 133/6249       | 0.017           | JUN TGFB1 SMAD3            |
| WP1971    | Integrated Cancer Pathway                                                      | 2/19             | 46/6249        | 0.02            | SMAD3 BCL2                 |
| WP1449    | Regulation of toll-like receptor signaling pathway                             | 3/19             | 145/6249       | 0.02            | JUN IRF3 IL6               |
| WP2848    | Differentiation Pathway                                                        | 2/19             | 48/6249        | 0.02            | TGFB1 IL6                  |
| WP2873    | Aryl Hydrocarbon Receptor Pathway                                              | 2/19             | 48/6249        | 0.02            | JUN TGFB1                  |

| <b>ID</b> | <b>Description</b>                                                           | <b>GeneRatio</b> | <b>BgRatio</b> | <b>p.adjust</b> | <b>geneID</b>     |
|-----------|------------------------------------------------------------------------------|------------------|----------------|-----------------|-------------------|
| WP2038    | Regulation of Microtubule Cytoskeleton                                       | 2/19             | 49/6249        | 0.021           | STAT3 GSK3B       |
| WP2406    | Cardiac Progenitor Differentiation                                           | 2/19             | 53/6249        | 0.024           | TGFB1 GSK3B       |
| WP363     | Wnt Signaling Pathway                                                        | 2/19             | 53/6249        | 0.024           | GSK3A GSK3B       |
| WP4262    | Breast cancer pathway                                                        | 3/19             | 157/6249       | 0.024           | JUN GSK3B PARP1   |
| WP3286    | Copper homeostasis                                                           | 2/19             | 54/6249        | 0.024           | JUN GSK3B         |
| WP289     | Myometrial Relaxation and Contraction Pathways                               | 3/19             | 158/6249       | 0.024           | JUN ATF5 IL6      |
| WP395     | IL-4 Signaling Pathway                                                       | 2/19             | 55/6249        | 0.024           | STAT5A STAT3      |
| WP585     | Interferon type I signaling pathways                                         | 2/19             | 55/6249        | 0.024           | STAT5A STAT3      |
| WP481     | Insulin Signaling                                                            | 3/19             | 161/6249       | 0.024           | JUN GSK3A GSK3B   |
| WP4239    | Epithelial to mesenchymal transition in colorectal cancer                    | 3/19             | 164/6249       | 0.025           | TGFB1 SMAD3 GSK3B |
| WP437     | EGF/EGFR Signaling Pathway                                                   | 3/19             | 164/6249       | 0.025           | STAT5A JUN STAT3  |
| WP2795    | Cardiac Hypertrophic Response                                                | 2/19             | 57/6249        | 0.025           | TGFB1 GSK3B       |
| WP3981    | miRNA regulation of prostate cancer signaling pathways                       | 2/19             | 59/6249        | 0.026           | BCL2 GSK3B        |
| WP4205    | MET in type 1 papillary renal cell carcinoma                                 | 2/19             | 59/6249        | 0.026           | JUN STAT3         |
| WP3863    | T-Cell antigen Receptor (TCR) pathway during Staphylococcus aureus infection | 2/19             | 62/6249        | 0.028           | JUN GSK3B         |
| WP2849    | Hematopoietic Stem Cell Differentiation                                      | 2/19             | 63/6249        | 0.028           | STAT5A IL6        |
| WP3624    | Lung fibrosis                                                                | 2/19             | 63/6249        | 0.028           | TGFB1 IL6         |
| WP61      | Notch Signaling Pathway                                                      | 2/19             | 63/6249        | 0.028           | STAT3 GSK3B       |
| WP4255    | Non-small cell lung cancer                                                   | 2/19             | 66/6249        | 0.03            | STAT5A STAT3      |
| WP2032    | Human Thyroid Stimulating Hormone (TSH) signaling pathway                    | 2/19             | 68/6249        | 0.032           | JUN STAT3         |
| WP3303    | RAC1/PAK1/p38/MMP2 Pathway                                                   | 2/19             | 69/6249        | 0.032           | STAT5A STAT3      |
| WP1982    | Sterol Regulatory Element-Binding Proteins (SREBP) signalling                | 2/19             | 73/6249        | 0.035           | KPNB1 GSK3A       |
| WP4018    | Pathways in clear cell renal cell carcinoma                                  | 2/19             | 87/6249        | 0.049           | STAT3 TGFB1       |
| WP2840    | Hair Follicle Development: Cytodifferentiation (Part 3 of 3)                 | 2/19             | 88/6249        | 0.049           | JUN TGFB1         |

# CLUSTER ANALYSIS

## 1 CLUSTER COMPARISON

### GO

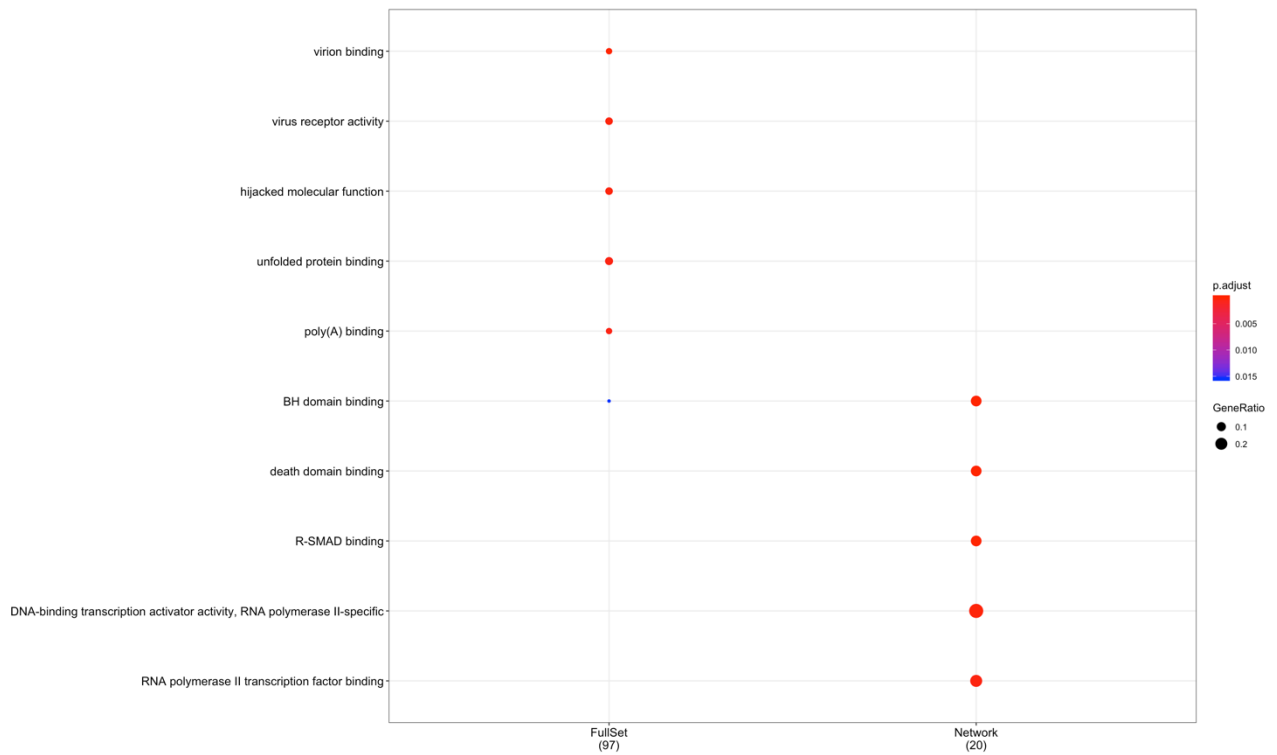

# KEGG PATHWAY

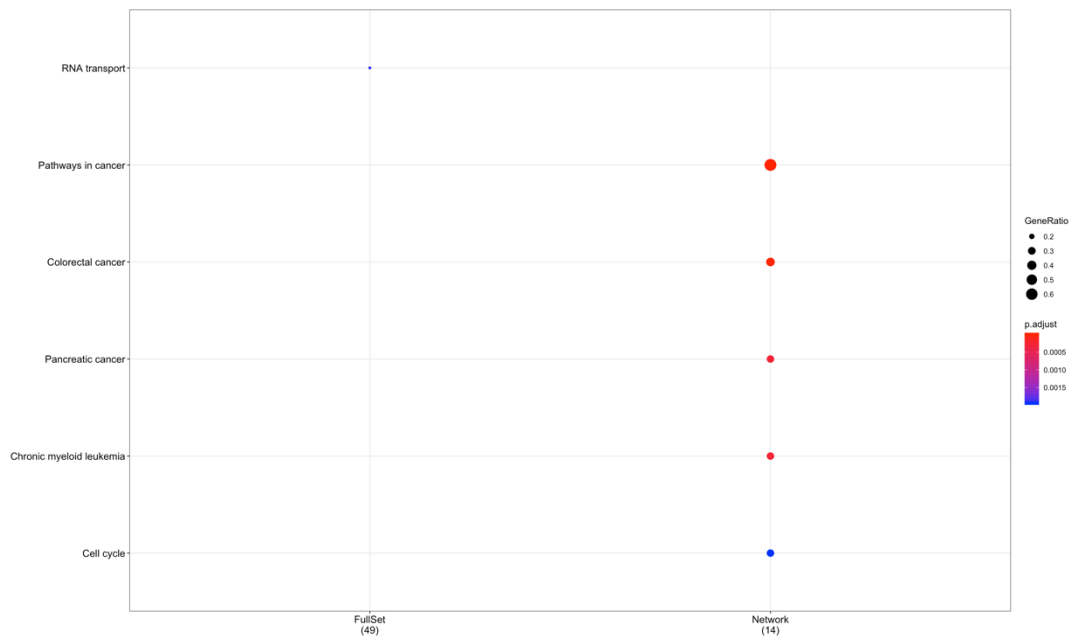

# GO.LOCATION

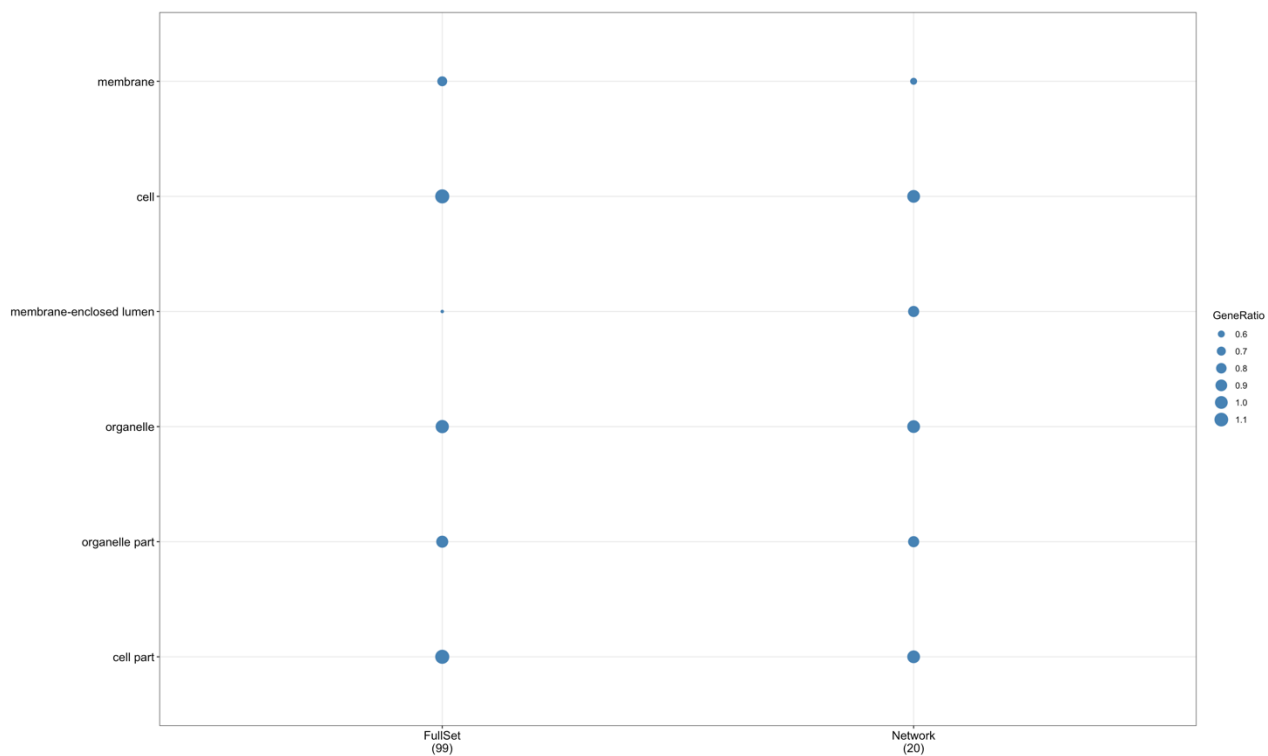

# 2 TABLES

## 2.1 GO

| Cluster | group   | ID         | Description                                   | GeneRatio | BgRatio   | p.adjust | geneID                                                           |
|---------|---------|------------|-----------------------------------------------|-----------|-----------|----------|------------------------------------------------------------------|
| FullSet | FullSet | GO:0046790 | virion binding                                | 4/97      | 10/17632  | 0        | 30835 10332<br>5478 302                                          |
| FullSet | FullSet | GO:0001618 | virus receptor activity                       | 6/97      | 74/17632  | 0        | 59272 339390<br>30835 10332<br>290 1803                          |
| FullSet | FullSet | GO:0104005 | hijacked molecular function                   | 6/97      | 74/17632  | 0        | 59272 339390<br>30835 10332<br>290 1803                          |
| FullSet | FullSet | GO:0051082 | unfolded protein binding                      | 7/97      | 127/17632 | 0        | 5478 3337<br>3329 3313<br>9360 10465<br>5204                     |
| FullSet | FullSet | GO:0008143 | poly(A) binding                               | 4/97      | 24/17632  | 0.001    | 10492 26986<br>8761 1653                                         |
| FullSet | FullSet | GO:0003727 | single-stranded RNA binding                   | 6/97      | 90/17632  | 0.001    | 3178 10492<br>5725 26986<br>8761 1653                            |
| FullSet | FullSet | GO:0070717 | poly-purine tract binding                     | 4/97      | 30/17632  | 0.001    | 10492 26986<br>8761 1653                                         |
| FullSet | FullSet | GO:0033218 | amide binding                                 | 10/97     | 348/17632 | 0.001    | 91452 30835<br>10332 3838<br>5478 290 3329<br>6729 9360<br>10465 |
| FullSet | FullSet | GO:0098505 | G-rich strand telomeric DNA binding           | 3/97      | 11/17632  | 0.001    | 3178 3181<br>7013                                                |
| FullSet | FullSet | GO:0042277 | peptide binding                               | 9/97      | 285/17632 | 0.001    | 30835 10332<br>3838 5478 290<br>3329 6729<br>9360 10465          |
| FullSet | FullSet | GO:0043047 | single-stranded telomeric DNA binding         | 3/97      | 13/17632  | 0.001    | 3178 3181<br>7013                                                |
| FullSet | FullSet | GO:0003755 | peptidyl-prolyl cis-trans isomerase activity  | 4/97      | 37/17632  | 0.001    | 5478 2280<br>9360 10465                                          |
| FullSet | FullSet | GO:0042162 | telomeric DNA binding                         | 4/97      | 38/17632  | 0.001    | 3178 3181<br>4691 7013                                           |
| FullSet | FullSet | GO:0098847 | sequence-specific single stranded DNA binding | 3/97      | 15/17632  | 0.001    | 3178 3181<br>7013                                                |
| FullSet | FullSet | GO:0045296 | cadherin binding                              | 9/97      | 323/17632 | 0.001    | 11344 10652<br>6811 302 3337<br>3646 128866<br>51429 25978       |
| FullSet | FullSet | GO:0016859 | cis-trans isomerase activity                  | 4/97      | 41/17632  | 0.001    | 5478 2280<br>9360 10465                                          |

| Cluster | group   | ID         | Description                                 | GeneRatio | BgRatio   | p.adjust | geneID                                                             |
|---------|---------|------------|---------------------------------------------|-----------|-----------|----------|--------------------------------------------------------------------|
| FullSet | FullSet | GO:0016018 | cyclosporin A binding                       | 3/97      | 19/17632  | 0.003    | 5478 9360<br>10465                                                 |
| FullSet | FullSet | GO:0140142 | nucleocytoplasmic<br>carrier activity       | 3/97      | 19/17632  | 0.003    | 7514 3838<br>3840                                                  |
| FullSet | FullSet | GO:0003729 | mRNA binding                                | 10/97     | 463/17632 | 0.004    | 3178 3181<br>220988 23521<br>26986 8761<br>10146 9908<br>4691 1655 |
| FullSet | FullSet | GO:0050839 | cell adhesion molecule<br>binding           | 10/97     | 486/17632 | 0.005    | 11344 10652<br>6811 928 302<br>3337 3646<br>128866 51429<br>25978  |
| FullSet | FullSet | GO:0036002 | pre-mRNA binding                            | 4/97      | 62/17632  | 0.005    | 3178 5725<br>3181 1655                                             |
| FullSet | FullSet | GO:0005484 | SNAP receptor activity                      | 3/97      | 30/17632  | 0.008    | 10652 6811<br>116841                                               |
| FullSet | FullSet | GO:0008187 | poly-pyrimidine tract<br>binding            | 3/97      | 33/17632  | 0.01     | 5725 26986<br>8761                                                 |
| FullSet | FullSet | GO:0003730 | mRNA 3'-UTR binding                         | 4/97      | 80/17632  | 0.013    | 3181 26986<br>8761 1655                                            |
| FullSet | FullSet | GO:0051400 | BH domain binding                           | 2/97      | 10/17632  | 0.015    | 599 597                                                            |
| FullSet | FullSet | GO:0061608 | nuclear import signal<br>receptor activity  | 2/97      | 10/17632  | 0.015    | 3838 3840                                                          |
| FullSet | FullSet | GO:0044389 | ubiquitin-like protein<br>ligase binding    | 7/97      | 301/17632 | 0.016    | 3329 3313<br>5707 51429<br>9146 7917<br>11200                      |
| FullSet | FullSet | GO:0008135 | translation factor<br>activity, RNA binding | 4/97      | 89/17632  | 0.016    | 3646 8668<br>8665 1915                                             |
| FullSet | FullSet | GO:0140104 | molecular carrier<br>activity               | 3/97      | 43/17632  | 0.018    | 7514 3838<br>3840                                                  |
| FullSet | FullSet | GO:0008494 | translation activator<br>activity           | 2/97      | 13/17632  | 0.023    | 26986 57409                                                        |
| FullSet | FullSet | GO:0003724 | RNA helicase activity                       | 3/97      | 48/17632  | 0.023    | 10146 1653<br>1655                                                 |
| FullSet | FullSet | GO:0003697 | single-stranded DNA<br>binding              | 4/97      | 105/17632 | 0.026    | 3178 3181<br>3329 7013                                             |
| FullSet | FullSet | GO:0003743 | translation initiation<br>factor activity   | 3/97      | 51/17632  | 0.026    | 3646 8668<br>8665                                                  |
| FullSet | FullSet | GO:0016887 | ATPase activity                             | 8/97      | 445/17632 | 0.028    | 5701 3329<br>3313 3832<br>10146 1653<br>1655 9550                  |
| FullSet | FullSet | GO:0042623 | ATPase activity,<br>coupled                 | 7/97      | 357/17632 | 0.031    | 5701 3313<br>3832 10146<br>1653 1655<br>9550                       |



| Cluster | group   | ID         | Description                                                              | GeneRatio | BgRatio   | p.adjust | geneID                          |
|---------|---------|------------|--------------------------------------------------------------------------|-----------|-----------|----------|---------------------------------|
| FullSet | FullSet | GO:0048306 | calcium-dependent protein binding                                        | 3/97      | 62/17632  | 0.041    | 10332 302 1655                  |
| FullSet | FullSet | GO:0031625 | ubiquitin protein ligase binding                                         | 6/97      | 286/17632 | 0.041    | 3329 3313 5707 51429 7917 11200 |
| FullSet | FullSet | GO:0002020 | protease binding                                                         | 4/97      | 125/17632 | 0.041    | 1803 302 3329 7917              |
| FullSet | FullSet | GO:0043021 | ribonucleoprotein complex binding                                        | 4/97      | 128/17632 | 0.043    | 6729 10465 7917 1655            |
| FullSet | FullSet | GO:0005537 | mannose binding                                                          | 2/97      | 22/17632  | 0.049    | 30835 10332                     |
| Network | Network | GO:0051400 | BH domain binding                                                        | 3/20      | 10/17632  | 0        | 598 4170 596                    |
| Network | Network | GO:0070513 | death domain binding                                                     | 3/20      | 10/17632  | 0        | 598 4170 596                    |
| Network | Network | GO:0070412 | R-SMAD binding                                                           | 3/20      | 23/17632  | 0        | 3725 4088 142                   |
| Network | Network | GO:0001228 | DNA-binding transcription activator activity, RNA polymerase II-specific | 6/20      | 449/17632 | 0        | 3725 6774 4088 22809 3661 142   |
| Network | Network | GO:0001085 | RNA polymerase II transcription factor binding                           | 4/20      | 140/17632 | 0        | 3725 6774 4088 2932             |
| Network | Network | GO:0019902 | phosphatase binding                                                      | 4/20      | 178/17632 | 0.001    | 6774 5499 4088 596              |
| Network | Network | GO:0033613 | activating transcription factor binding                                  | 3/20      | 76/17632  | 0.001    | 3725 4088 4869                  |
| Network | Network | GO:0034236 | protein kinase A catalytic subunit binding                               | 2/20      | 13/17632  | 0.001    | 2931 2932                       |
| Network | Network | GO:0046332 | SMAD binding                                                             | 3/20      | 80/17632  | 0.001    | 3725 4088 142                   |
| Network | Network | GO:0035259 | glucocorticoid receptor binding                                          | 2/20      | 14/17632  | 0.001    | 6774 4088                       |
| Network | Network | GO:0050321 | tau-protein kinase activity                                              | 2/20      | 15/17632  | 0.001    | 2931 2932                       |
| Network | Network | GO:0035258 | steroid hormone receptor binding                                         | 3/20      | 90/17632  | 0.001    | 6774 4088 142                   |
| Network | Network | GO:0031625 | ubiquitin protein ligase binding                                         | 4/20      | 286/17632 | 0.003    | 3725 4088 596 2932              |
| Network | Network | GO:0044389 | ubiquitin-like protein ligase binding                                    | 4/20      | 301/17632 | 0.003    | 3725 4088 596 2932              |
| Network | Network | GO:0019903 | protein phosphatase binding                                              | 3/20      | 133/17632 | 0.003    | 6774 5499 596                   |
| Network | Network | GO:0051059 | NF-kappaB binding                                                        | 2/20      | 28/17632  | 0.003    | 2932 4869                       |
| Network | Network | GO:0035257 | nuclear hormone receptor binding                                         | 3/20      | 152/17632 | 0.005    | 6774 4088 142                   |

| Cluster | group   | ID         | Description                                                                                      | GeneRatio | BgRatio   | p.adjust | geneID         |
|---------|---------|------------|--------------------------------------------------------------------------------------------------|-----------|-----------|----------|----------------|
| Network | Network | GO:0001102 | RNA polymerase II activating transcription factor binding                                        | 2/20      | 44/17632  | 0.007    | 3725 4088      |
| Network | Network | GO:0051427 | hormone receptor binding                                                                         | 3/20      | 185/17632 | 0.007    | 6774 4088 142  |
| Network | Network | GO:0051018 | protein kinase A binding                                                                         | 2/20      | 48/17632  | 0.008    | 2931 2932      |
| Network | Network | GO:0005160 | transforming growth factor beta receptor binding                                                 | 2/20      | 51/17632  | 0.009    | 7040 4088      |
| Network | Network | GO:0005126 | cytokine receptor binding                                                                        | 3/20      | 281/17632 | 0.02     | 6774 7040 4088 |
| Network | Network | GO:0008013 | beta-catenin binding                                                                             | 2/20      | 82/17632  | 0.02     | 4088 2932      |
| Network | Network | GO:0001077 | proximal promoter DNA-binding transcription activator activity, RNA polymerase II-specific       | 3/20      | 298/17632 | 0.022    | 3725 6774 3661 |
| Network | Network | GO:0008565 | protein transporter activity                                                                     | 2/20      | 88/17632  | 0.022    | 3837 4170      |
| Network | Network | GO:0047485 | protein N-terminus binding                                                                       | 2/20      | 107/17632 | 0.03     | 7040 142       |
| Network | Network | GO:0042826 | histone deacetylase binding                                                                      | 2/20      | 112/17632 | 0.032    | 5245 142       |
| Network | Network | GO:0031490 | chromatin DNA binding                                                                            | 2/20      | 119/17632 | 0.035    | 6774 4088      |
| Network | Network | GO:0002020 | protease binding                                                                                 | 2/20      | 125/17632 | 0.037    | 596 2932       |
| Network | Network | GO:0043021 | ribonucleoprotein complex binding                                                                | 2/20      | 128/17632 | 0.037    | 5499 4869      |
| Network | Network | GO:0035326 | enhancer binding                                                                                 | 2/20      | 133/17632 | 0.039    | 3725 4088      |
| Network | Network | GO:0005072 | transforming growth factor beta receptor, cytoplasmic mediator activity                          | 1/20      | 10/17632  | 0.042    | 4088           |
| Network | Network | GO:0030957 | Tat protein binding                                                                              | 1/20      | 10/17632  | 0.042    | 4869           |
| Network | Network | GO:0034713 | type I transforming growth factor beta receptor binding                                          | 1/20      | 11/17632  | 0.045    | 7040           |
| Network | Network | GO:0000982 | transcription factor activity, RNA polymerase II proximal promoter sequence-specific DNA binding | 3/20      | 447/17632 | 0.045    | 3725 6774 3661 |
| Network | Network | GO:0034452 | dynactin binding                                                                                 | 1/20      | 12/17632  | 0.045    | 2932           |
| Network | Network | GO:0070410 | co-SMAD binding                                                                                  | 1/20      | 12/17632  | 0.045    | 4088           |
| Network | Network | GO:0043023 | ribosomal large subunit binding                                                                  | 1/20      | 13/17632  | 0.047    | 4869           |

| Cluster | group   | ID         | Description                   | GeneRatio | BgRatio  | p.adjust | geneID |
|---------|---------|------------|-------------------------------|-----------|----------|----------|--------|
| Network | Network | GO:0001846 | opsonin binding               | 1/20      | 14/17632 | 0.048    | 5245   |
| Network | Network | GO:0035497 | cAMP response element binding | 1/20      | 14/17632 | 0.048    | 3725   |

## 2.2 KEGG

| Cluster | group   | ID       | Description                               | GeneRatio | BgRatio  | p.adjust | geneID                                              |
|---------|---------|----------|-------------------------------------------|-----------|----------|----------|-----------------------------------------------------|
| FullSet | FullSet | hsa03013 | RNA transport                             | 8/49      | 152/5894 | 0.002    | 7514 3646<br>8668 8665<br>26986 8761<br>1915 7329   |
| Network | Network | hsa05200 | Pathways in cancer                        | 9/14      | 327/5894 | 0        | 6776 3725<br>6774 7040<br>4088 598 596<br>6502 2932 |
| Network | Network | hsa05210 | Colorectal cancer                         | 5/14      | 62/5894  | 0        | 3725 7040<br>4088 596 2932                          |
| Network | Network | hsa05212 | Pancreatic cancer                         | 4/14      | 70/5894  | 0        | 6774 7040<br>4088 598                               |
| Network | Network | hsa05220 | Chronic myeloid leukemia                  | 4/14      | 73/5894  | 0        | 6776 7040<br>4088 598                               |
| Network | Network | hsa04110 | Cell cycle                                | 4/14      | 128/5894 | 0.002    | 7040 4088<br>6502 2932                              |
| Network | Network | hsa05145 | Toxoplasmosis                             | 4/14      | 133/5894 | 0.002    | 6774 7040 598<br>596                                |
| Network | Network | hsa05222 | Small cell lung cancer                    | 3/14      | 85/5894  | 0.006    | 598 596 6502                                        |
| Network | Network | hsa04510 | Focal adhesion                            | 4/14      | 200/5894 | 0.006    | 3725 5499 596<br>2932                               |
| Network | Network | hsa04012 | ErbB signaling pathway                    | 3/14      | 87/5894  | 0.006    | 6776 3725<br>2932                                   |
| Network | Network | hsa05142 | Chagas disease (American trypanosomiasis) | 3/14      | 104/5894 | 0.009    | 3725 7040<br>4088                                   |
| Network | Network | hsa04722 | Neurotrophin signaling pathway            | 3/14      | 127/5894 | 0.015    | 3725 596 2932                                       |
| Network | Network | hsa05160 | Hepatitis C                               | 3/14      | 135/5894 | 0.017    | 6774 3661<br>2932                                   |
| Network | Network | hsa04310 | Wnt signaling pathway                     | 3/14      | 151/5894 | 0.021    | 3725 4088<br>2932                                   |
| Network | Network | hsa04630 | Jak-STAT signaling pathway                | 3/14      | 155/5894 | 0.021    | 6776 6774 598                                       |
| Network | Network | hsa05014 | Amyotrophic lateral sclerosis (ALS)       | 2/14      | 54/5894  | 0.026    | 598 596                                             |
| Network | Network | hsa05221 | Acute myeloid leukemia                    | 2/14      | 58/5894  | 0.028    | 6776 6774                                           |

| Cluster | group   | ID       | Description                       | GeneRatio | BgRatio  | p.adjust | geneID         |
|---------|---------|----------|-----------------------------------|-----------|----------|----------|----------------|
| Network | Network | hsa04062 | Chemokine signaling pathway       | 3/14      | 189/5894 | 0.03     | 6774 2931 2932 |
| Network | Network | hsa05211 | Renal cell carcinoma              | 2/14      | 70/5894  | 0.036    | 3725 7040      |
| Network | Network | hsa05140 | Leishmaniasis                     | 2/14      | 73/5894  | 0.037    | 3725 7040      |
| Network | Network | hsa04662 | B cell receptor signaling pathway | 2/14      | 75/5894  | 0.037    | 3725 2932      |
| Network | Network | hsa04350 | TGF-beta signaling pathway        | 2/14      | 85/5894  | 0.044    | 7040 4088      |
| Network | Network | hsa04210 | Apoptosis                         | 2/14      | 89/5894  | 0.044    | 598 596        |
| Network | Network | hsa05215 | Prostate cancer                   | 2/14      | 89/5894  | 0.044    | 596 2932       |
| Network | Network | hsa05323 | Rheumatoid arthritis              | 2/14      | 92/5894  | 0.045    | 3725 7040      |

## 2.3 GO LOCATION

| Cluster | group   | ID         | Description             | GeneRatio | geneID                                                                                                                                                                                                                                                                                                                                                                                                                                                                                                                                                                                                                |
|---------|---------|------------|-------------------------|-----------|-----------------------------------------------------------------------------------------------------------------------------------------------------------------------------------------------------------------------------------------------------------------------------------------------------------------------------------------------------------------------------------------------------------------------------------------------------------------------------------------------------------------------------------------------------------------------------------------------------------------------|
| FullSet | FullSet | GO:0016020 | membrane                | 75/99     | 23256 5701 10652 6811 91452 92521 7514 4539 4513 3178 59272 339390 30835 10332 3838 6441 5478 599 597 3840 8575 928 7113 3551 290 1803 10492 5725 634 302 3181 3329 9276 23521 3646 4836 128866 8665 8665 8729 3832 5707 51429 4841 26986 6143 4691 1653 408050 408050 2280 4140 9146 7917 7917 7917 7917 7917 7917 7917 7917 819 25978 116841 81926 4705 4705 79001 81887 6224 10540 1655 1915 857 6449 9550                                                                                                                                                                                                         |
| FullSet | FullSet | GO:0005576 | extracellular region    | 53/99     | 5701 11344 10875 3178 59272 30835 10332 6441 5478 928 7113 290 1803 5725 634 302 3181 3337 3329 3313 3646 8668 128866 5707 51429 26986 4691 4140 9146 7917 7917 7917 7917 7917 23564 23564 23564 23564 23564 23564 25978 7177 710 5683 55506 6224 10540 1655 1915 9550                                                                                                                                                                                                                                                                                                                                                |
| FullSet | FullSet | GO:0005623 | cell                    | 113/99    | 689 23256 5701 11344 10652 6811 51187 91452 92521 10875 7514 4539 4513 3178 59272 339390 30835 10332 3838 6441 5478 599 597 3840 8575 928 7113 3551 290 85437 1803 10492 5725 634 302 3181 220988 50 3337 3329 3313 9276 23521 3646 8668 4836 128866 8665 8665 8729 6241 3832 5707 6729 84955 51429 4841 26986 8761 10146 9908 6143 4691 1653 23429 23429 408050 408050 2280 9360 4140 10465 11123 9146 7917 7917 7917 7917 7917 7917 7917 23564 23564 23564 23564 23564 23564 819 25978 116841 23609 710 5683 81926 5204 57409 4705 4705 79001 81887 55506 6224 11200 7013 10540 1655 119710 1915 857 7329 6449 9550 |
| FullSet | FullSet | GO:0009295 | nucleoid                | 1/99      | 3313                                                                                                                                                                                                                                                                                                                                                                                                                                                                                                                                                                                                                  |
| FullSet | FullSet | GO:0030054 | cell junction           | 12/99     | 5478 928 1803 634 302 3313 23521 26986 10146 6143 81926 857                                                                                                                                                                                                                                                                                                                                                                                                                                                                                                                                                           |
| FullSet | FullSet | GO:0031974 | membrane-enclosed lumen | 53/99     | 5701 51187 91452 10875 7514 3178 3838 5478 3840 8575 85437 10492 5725 302 3181 220988 50 3337 3329 3313 23521 3646 8729 5707 6729 84955 4841 4691 1653 23429 23429 9360 10465 7917 7917 7917 7917 7917 7917 7917 710 5683 57409 4705 4705 81887 55506 6224 11200 7013 1655 1915 7329                                                                                                                                                                                                                                                                                                                                  |

| Cluster | group   | ID         | Description                | GeneRatio | geneID                                                                                                                                                                                                                                                                                                                                                                                                                                                                                                                                                                                                                 |
|---------|---------|------------|----------------------------|-----------|------------------------------------------------------------------------------------------------------------------------------------------------------------------------------------------------------------------------------------------------------------------------------------------------------------------------------------------------------------------------------------------------------------------------------------------------------------------------------------------------------------------------------------------------------------------------------------------------------------------------|
| FullSet | FullSet | GO:0032991 | protein-containing complex | 70/99     | 5701 10652 6811 51187 92521 10875 7514 4539 4513 3178 6441 5478 599 8575 3551 85437 10492 634 302 3181 220988 3329 9276 23521 3646 8668 128866 8665 8665 3832 5707 6729 4841 26986 8761 10146 9908 6143 4691 1653 23429 23429 2280 10465 9146 7917 7917 7917 7917 7917 7917 7917 25978 116841 7681 5683 5204 4705 4705 81887 55506 6224 7013 10540 1655 1915 857 7329 6449 9550                                                                                                                                                                                                                                        |
| FullSet | FullSet | GO:0043226 | organelle                  | 104/99    | 689 23256 5701 11344 10652 6811 51187 91452 92521 10875 7514 4539 4513 3178 59272 3838 6441 5478 599 597 3840 8575 928 7113 3551 290 85437 1803 10492 5725 634 302 3181 220988 50 3337 3329 3313 9276 23521 3646 8668 4836 128866 8729 3832 5707 6729 84955 51429 4841 26986 8761 10146 6143 4691 1653 23429 23429 408050 408050 2280 9360 4140 10465 9146 7917 7917 7917 7917 7917 7917 7917 7917 23564 23564 23564 23564 23564 23564 23564 819 25978 116841 710 5683 81926 5204 57409 4705 4705 79001 81887 55506 6224 11200 7013 10540 1655 119710 1915 857 7329 6449 9550                                          |
| FullSet | FullSet | GO:0044215 | other organism             | 3/99      | 7514 30835 10332                                                                                                                                                                                                                                                                                                                                                                                                                                                                                                                                                                                                       |
| FullSet | FullSet | GO:0044217 | other organism part        | 3/99      | 7514 30835 10332                                                                                                                                                                                                                                                                                                                                                                                                                                                                                                                                                                                                       |
| FullSet | FullSet | GO:0044421 | extracellular region part  | 49/99     | 11344 10875 3178 59272 6441 5478 928 7113 290 1803 5725 634 302 3181 3337 3329 3313 3646 8668 128866 51429 26986 4691 4140 9146 7917 7917 7917 7917 7917 7917 7917 23564 23564 23564 23564 23564 23564 23564 25978 7177 710 5683 55506 6224 10540 1655 1915 9550                                                                                                                                                                                                                                                                                                                                                       |
| FullSet | FullSet | GO:0044422 | organelle part             | 92/99     | 23256 5701 11344 10652 6811 51187 91452 92521 10875 7514 4539 4513 3178 3838 6441 5478 599 597 3840 8575 928 290 85437 1803 10492 5725 634 302 3181 220988 50 3337 3329 3313 9276 23521 3646 128866 8729 3832 5707 6729 84955 51429 4841 26986 6143 4691 1653 23429 23429 408050 408050 2280 9360 10465 9146 7917 7917 7917 7917 7917 7917 23564 23564 23564 23564 23564 23564 23564 25978 116841 710 5683 81926 57409 4705 4705 79001 81887 55506 6224 11200 7013 10540 1655 1915 857 7329 6449 9550                                                                                                                  |
| FullSet | FullSet | GO:0044425 | membrane part              | 39/99     | 23256 10652 6811 91452 7514 4539 4513 59272 339390 30835 10332 3838 6441 928 7113 3551 290 1803 634 302 3329 9276 4836 128866 51429 408050 408050 2280 819 25978 116841 81926 4705 4705 79001 1915 857 6449 9550                                                                                                                                                                                                                                                                                                                                                                                                       |
| FullSet | FullSet | GO:0044456 | synapse part               | 8/99      | 5701 3838 220988 3337 25978 116841 81926 6449                                                                                                                                                                                                                                                                                                                                                                                                                                                                                                                                                                          |
| FullSet | FullSet | GO:0044464 | cell part                  | 113/99    | 689 23256 5701 11344 10652 6811 51187 91452 92521 10875 7514 4539 4513 3178 59272 339390 30835 10332 3838 6441 5478 599 597 3840 8575 928 7113 3551 290 85437 1803 10492 5725 634 302 3181 220988 50 3337 3329 3313 9276 23521 3646 8668 4836 128866 8665 8665 8729 6241 3832 5707 6729 84955 51429 4841 26986 8761 10146 9908 6143 4691 1653 23429 23429 408050 408050 2280 9360 4140 10465 11123 9146 7917 7917 7917 7917 7917 7917 23564 23564 23564 23564 23564 23564 23564 819 25978 116841 23609 710 5683 81926 5204 57409 4705 4705 79001 81887 55506 6224 11200 7013 10540 1655 119710 1915 857 7329 6449 9550 |
| FullSet | FullSet | GO:0045202 | synapse                    | 11/99     | 5701 3838 220988 3337 6143 25978 116841 81926 6224 7329 6449                                                                                                                                                                                                                                                                                                                                                                                                                                                                                                                                                           |
| FullSet | FullSet | GO:0099080 | supramolecular complex     | 5/99      | 11344 92521 3832 2280 10540                                                                                                                                                                                                                                                                                                                                                                                                                                                                                                                                                                                            |
| Network | Network | GO:0016020 | membrane                   | 12/20     | 3837 5245 6774 5499 7040 4088 598 4170 596 2932 4869 142                                                                                                                                                                                                                                                                                                                                                                                                                                                                                                                                                               |
| Network | Network | GO:0005576 | extracellular region       | 4/20      | 3837 5245 5499 7040                                                                                                                                                                                                                                                                                                                                                                                                                                                                                                                                                                                                    |

| Cluster | group   | ID         | Description                | GeneRatio | geneID                                                                                               |
|---------|---------|------------|----------------------------|-----------|------------------------------------------------------------------------------------------------------|
| Network | Network | GO:0005623 | cell                       | 20/20     | 7942 3837 6776 5245 3725 6774 5499 7040 4088 22809 3661<br>598 4170 596 6502 4666 2931 2932 4869 142 |
| Network | Network | GO:0030054 | cell junction              | 3/20      | 5499 598 4869                                                                                        |
| Network | Network | GO:0031974 | membrane-enclosed lumen    | 17/20     | 3837 6776 5245 3725 6774 5499 7040 4088 22809 3661 598<br>4170 596 6502 2932 4869 142                |
| Network | Network | GO:0032991 | protein-containing complex | 15/20     | 3837 3725 6774 5499 4088 22809 598 4170 596 6502 4666<br>2931 2932 4869 142                          |
| Network | Network | GO:0043226 | organelle                  | 20/20     | 7942 3837 6776 5245 3725 6774 5499 7040 4088 22809 3661<br>598 4170 596 6502 4666 2931 2932 4869 142 |
| Network | Network | GO:0044215 | other organism             | 1/20      | 3837                                                                                                 |
| Network | Network | GO:0044217 | other organism part        | 1/20      | 3837                                                                                                 |
| Network | Network | GO:0044421 | extracellular region part  | 4/20      | 3837 5245 5499 7040                                                                                  |
| Network | Network | GO:0044422 | organelle part             | 17/20     | 3837 6776 5245 3725 6774 5499 7040 4088 22809 3661 598<br>4170 596 6502 2932 4869 142                |
| Network | Network | GO:0044425 | membrane part              | 4/20      | 5245 598 4170 596                                                                                    |
| Network | Network | GO:0044456 | synapse part               | 6/20      | 5245 6774 5499 598 2931 2932                                                                         |
| Network | Network | GO:0044464 | cell part                  | 20/20     | 7942 3837 6776 5245 3725 6774 5499 7040 4088 22809 3661<br>598 4170 596 6502 4666 2931 2932 4869 142 |
| Network | Network | GO:0045202 | synapse                    | 6/20      | 5245 6774 5499 598 2931 2932                                                                         |
